# Supplementary material
Source: publisher figshare collection journal article supplement (https://tandf.figshare.com/ndownloader/files/17927036)
Supplement: Supplementary file 1 [file 17927036]

x2	x3	x4	x5	x6	x7	x10	x11	x12	x13	x14	x1.1	x1.2	x1.3	x8.1	x8.2	x8.3	x8.4	x8.5	x8.6	x9.1	x9.2	x9.3	x9.4	x9.5	y
1	0	0	0	100	1	120	54.2	1258	1470	1	0	1	0	0	0	0	0	1	0	0	0	0	1	0	8998
1	0	0	0	234	1	138	38.8	310.3	882	1	0	1	0	0	0	0	0	0	1	0	0	0	1	0	2825
0	1	0	0	110	2	120	45	742.6	1176	4	0	1	0	0	0	0	0	0	1	0	0	0	0	1	2996
0	0	1	0	148	1	130	58.2	813.6	1043	1	0	1	0	0	0	0	0	1	0	0	0	0	1	0	5707
1	0	0	0	171	1	120	33	299.1	1037	1	0	1	0	0	0	0	0	1	0	0	0	0	1	0	3321
0	0	1	0	246	1	130	65	1162	1433	1	0	1	0	0	0	0	0	1	0	0	0	0	1	0	7407
1	0	0	0	45	1	130	42	376.9	588	1	0	1	0	0	0	0	0	0	1	0	0	0	1	0	3240
0	0	1	0	206	1	120	60	940.5	1471	1	0	0	1	0	0	0	0	1	0	0	0	0	1	0	6800
0	1	0	0	187	1	120	29	252.3	588	2	0	0	1	1	0	0	0	0	0	1	0	0	0	0	1000
1	0	0	0	66	1	130	42	376.9	588	1	0	1	0	0	0	0	0	0	1	0	0	0	1	0	7020
0	1	0	0	45	1	120	47	465.9	1065	1	0	1	0	0	0	0	0	1	0	0	0	0	1	0	7250
0	0	1	0	267	1	120	60	940.5	1471	1	0	0	1	0	0	0	0	1	0	0	0	0	1	0	1470
0	1	0	0	246	1	130	53.6	924.3	919	1	0	0	1	0	0	0	0	0	1	0	0	0	1	0	6400
1	0	0	0	102	1	120	54.2	1258	1470	1	0	1	0	0	0	0	0	1	0	0	0	0	1	0	5401
1	0	0	0	96	1	120	64.8	996	1470	1	0	1	0	0	0	0	0	1	0	0	0	0	1	0	8060
0	1	0	0	58	1	120	42.7	338.9	588	1	0	1	0	0	0	0	0	0	1	0	0	0	1	0	3254
0	1	0	0	148	1	140	61.2	916.3	478	1	0	0	1	1	0	0	0	0	0	1	0	0	0	0	2000
0	0	0	1	286	1	120	84.9	2382	2648	4	0	0	1	0	0	0	0	1	0	0	0	0	1	0	8500
1	0	0	0	39	1	130	64.8	970.2	1341	1	0	1	0	0	0	0	0	0	1	0	0	0	1	0	5160
0	0	1	0	89	1	135	80.3	1598	2207	1	0	0	1	0	0	0	0	1	0	0	0	0	1	0	8250
0	0	1	0	276	1	140	52.8	491.4	1212	1	0	1	0	0	0	0	0	1	0	0	0	0	1	0	2694
0	1	0	0	132	1	140	60.3	896.7	883	1	0	0	1	1	0	0	0	0	0	1	0	0	0	0	1775
0	1	0	0	62	1	120	45	742.6	1176	1	0	1	0	0	0	0	0	1	0	0	0	0	1	0	1700
1	0	0	0	251	1	138	38.8	310.3	882	1	0	1	0	0	0	0	0	0	1	0	0	0	1	0	1775
1	0	0	0	168	1	120	42	376.9	588	1	0	1	0	0	1	0	0	0	0	0	0	0	1	0	5020
0	0	1	0	95	1	120	29	264.4	698	1	0	1	0	0	0	0	0	1	0	0	0	0	1	0	3565
0	1	0	0	33	2	125	46	664.9	1877	1	0	1	0	0	0	0	0	1	0	0	0	0	0	1	900
0	1	0	0	79	1	120	45	742.6	1176	1	0	1	0	0	0	0	0	1	0	0	0	0	1	0	892
1	0	0	0	245	1	120	45	539.6	882	1	0	1	0	0	0	0	0	1	0	0	0	0	1	0	3590
1	0	0	0	52	1	130	42	376.9	588	1	0	1	0	0	0	0	0	0	1	0	0	0	1	0	4880
0	0	1	0	57	1	130	42	376.9	588	1	0	1	0	0	0	0	0	1	0	0	0	0	1	0	4940
0	0	1	0	46	1	120	42.7	338.9	588	1	0	1	0	0	0	0	0	1	0	0	0	0	1	0	3743
0	0	0	1	129	1	130	71.1	1256	699	2	0	0	1	1	0	0	0	0	0	0	1	0	0	0	3240
0	0	1	0	152	2	120	43.1	494.5	845	2	0	1	0	0	0	0	0	1	0	0	0	0	0	1	0
1	0	0	0	28	1	130	42	376.9	588	1	0	1	0	0	0	0	0	0	1	0	0	0	1	0	3080
1	0	0	0	130	1	130	40.5	438.6	882	1	0	1	0	0	0	0	0	1	0	0	0	0	1	0	2970
0	0	1	0	227	1	130	65	1162	1433	1	0	1	0	0	0	0	0	1	0	0	0	0	1	0	8198
1	0	0	0	230	1	140	37.7	415.7	882	1	0	1	0	0	0	0	0	1	0	0	0	0	1	0	2960
0	0	1	0	273	1	130	64.6	811.5	1471	1	0	0	1	0	0	0	0	1	0	0	0	0	1	0	4420
1	0	0	0	264	1	140	37.7	415.7	882	1	0	1	0	0	0	0	0	1	0	0	0	0	1	0	3294
0	1	0	0	97	1	130	65	1162	1433	1	0	1	0	0	0	0	0	1	0	0	0	0	1	0	2079
0	1	0	0	97	1	130	45	742.6	1176	1	0	1	0	0	0	0	0	1	0	0	0	0	1	0	1420
0	0	1	0	313	1	120	39.5	372.5	735	1	0	1	0	0	0	0	0	1	0	0	0	0	1	0	3324
0	0	1	0	50	1	130	38.8	310.3	882	1	0	1	0	0	0	0	0	1	0	0	0	0	1	0	3365
1	0	0	0	23	1	130	42	376.9	588	1	0	1	0	0	0	0	0	0	1	0	0	0	1	0	7160
0	0	1	0	48	1	130	42	376.9	588	2	0	1	0	0	0	0	0	1	0	0	0	0	1	0	5380
0	0	1	0	279	1	120	84.9	2382	2648	1	0	0	1	0	0	0	0	1	0	0	0	0	1	0	7800
0	0	1	0	138	1	120	38.3	360	588	1	0	1	0	0	0	0	0	1	0	0	0	0	1	0	8055
0	1	0	0	234	1	130	80.3	1598	2207	1	0	0	1	0	0	0	0	1	0	0	0	0	1	0	7700
0	0	1	0	153	1	120	43	358.1	588	1	0	1	0	0	0	0	0	1	0	0	0	0	1	0	7935
0	0	1	0	141	2	120	46	666.5	1139	1	0	1	0	0	0	0	0	1	0	0	0	0	0	1	16000
0	1	0	0	280	1	135	60	993.4	1433	1	0	1	0	0	0	0	0	1	0	0	0	0	1	0	3461
0	0	1	0	225	1	130	65	1162	1433	1	0	1	0	0	0	0	0	1	0	0	0	0	1	0	6367
1	0	0	0	146	1	125	56.6	705.6	1300	1	0	1	0	0	0	0	0	0	1	0	0	0	1	0	6685
0	1	0	0	287	1	140	61.2	916.3	478	1	0	0	1	1	0	0	0	0	0	1	0	0	0	0	755
0	1	0	0	292	1	140	29	252.3	588	1	0	0	1	1	0	0	0	0	0	1	0	0	0	0	5880
1	0	0	0	100	1	120	43	358.1	588	1	0	1	0	0	0	0	0	0	1	0	0	0	1	0	5304
0	1	0	0	59	1	120	47	465.9	1065	1	0	1	0	0	0	0	0	1	0	0	0	0	1	0	5100
0	1	0	0	78	2	125	46	664.9	1877	2	0	1	0	0	0	0	0	1	0	0	0	0	0	1	400
0	0	1	0	73	1	130	84.9	2382	2648	1	0	0	1	0	0	0	0	0	1	0	0	0	1	0	2100
1	0	0	0	25	1	130	64.8	1106	1470	1	0	1	0	0	0	0	0	0	1	0	0	0	1	0	2080
1	0	0	0	207	1	120	45	539.6	882	1	0	1	0	0	0	0	0	1	0	0	0	0	1	0	3063
0	0	0	1	132	1	130	71.1	1256	699	3	0	0	1	1	0	0	0	0	0	0	1	0	0	0	4515
0	1	0	0	25	2	130	46	664.9	1877	1	0	1	0	0	0	0	0	1	0	0	0	0	0	1	1000
1	0	0	0	65	1	120	54.2	1258	1470	1	0	1	0	0	0	0	0	1	0	0	0	0	1	0	3091
1	0	0	0	43	1	130	67	1493	1470	1	0	1	0	0	0	0	0	0	1	0	0	0	1	0	9882
0	0	0	1	144	2	120	45	742.6	1176	3	0	1	0	0	0	0	0	0	1	0	0	0	0	1	0
0	0	1	0	148	1	120	29	264.4	698	1	0	1	0	0	0	0	0	1	0	0	0	0	1	0	8090
0	1	0	0	52	2	120	46	664.9	1877	1	0	1	0	0	0	0	0	1	0	0	0	0	0	1	1260
0	0	1	0	99	1	130	43	358.1	588	1	0	1	0	0	0	0	0	1	0	0	0	0	1	0	15213
1	0	0	0	86	1	120	29	264.4	698	1	0	1	0	0	0	0	0	1	0	0	0	0	1	0	2200
0	1	0	0	85	1	120	47.1	538.7	1300	1	0	1	0	0	0	0	0	0	1	0	0	0	1	0	9210
1	0	0	0	325	1	138	38.8	310.3	882	1	0	1	0	0	0	0	0	0	1	0	0	0	1	0	2025
0	1	0	0	29	1	120	45	742.6	1176	1	0	1	0	0	0	0	0	1	0	0	0	0	1	0	5940
1	0	0	0	42	1	130	58.2	813.6	1043	1	0	1	0	0	0	0	0	0	1	0	0	0	1	0	12750
0	1	0	0	331	1	120	60	940.5	1471	1	0	0	1	0	0	0	0	1	0	0	0	0	1	0	20450
0	0	1	0	151	1	120	43	358.1	588	1	0	1	0	0	0	0	0	1	0	0	0	0	1	0	7401
0	0	1	0	188	1	120	60	940.5	1471	1	0	0	1	0	0	0	0	1	0	0	0	0	1	0	4740
0	0	0	1	70	1	130	53.6	924.3	919	1	0	0	1	0	0	0	0	0	1	0	0	0	1	0	12100
0	0	1	0	261	1	120	38.3	360	588	1	0	1	0	0	0	0	0	1	0	0	0	0	1	0	5474
1	0	0	0	176	1	120	47	465.9	1065	1	0	1	0	0	0	0	0	1	0	0	0	0	1	0	2667
0	0	1	0	255	1	120	60	940.5	1471	1	0	0	1	0	0	0	0	1	0	0	0	0	1	0	460
0	0	0	1	157	2	120	46	664.7	1877	1	0	1	0	0	0	1	0	0	0	0	0	0	1	0	1000
1	0	0	0	93	1	120	39.5	372.5	735	1	0	1	0	0	0	0	0	1	0	0	0	0	1	0	1736
0	1	0	0	264	1	140	61.2	916.3	478	1	0	0	1	1	0	0	0	0	0	1	0	0	0	0	440
0	1	0	0	71	1	150	29	252.3	588	1	0	0	1	1	0	0	0	0	0	0	1	0	0	0	2100
1	0	0	0	130	2	120	45	742.6	1176	1	0	1	0	0	0	0	0	0	1	0	0	0	0	1	4878
0	0	1	0	107	1	120	38.3	360	588	1	0	1	0	0	0	0	0	1	0	0	0	0	1	0	3899
1	0	0	0	102	1	120	37.2	388.2	588	1	0	1	0	0	0	0	0	0	1	0	0	0	1	0	5525
0	1	0	0	249	1	140	61.2	916.3	478	1	0	0	1	1	0	0	0	0	0	0	1	0	0	0	695
1	0	0	0	63	1	125	63.5	1075	1189	2	0	1	0	0	0	0	0	0	1	0	0	0	1	0	0
0	0	1	0	119	1	120	38.3	360	588	1	0	1	0	0	0	0	0	1	0	0	0	0	1	0	4008
0	1	0	0	101	1	130	38.8	310.3	882	1	0	1	0	0	0	0	0	1	0	0	0	0	1	0	816
0	1	0	0	116	1	120	54.2	1258	1470	1	0	1	0	0	0	0	0	1	0	0	0	0	1	0	8162
1	0	0	0	95	1	120	43	358.1	588	2	0	1	0	0	0	0	0	0	1	0	0	0	1	0	0
0	1	0	0	123	1	130	58.2	813.6	1043	1	0	1	0	0	0	0	0	1	0	0	0	0	1	0	5645
0	0	1	0	133	1	120	38.3	360	588	1	0	1	0	0	0	0	0	1	0	0	0	0	1	0	12282
0	1	0	0	67	1	120	29	264.4	698	4	0	1	0	0	0	0	0	1	0	0	0	0	1	0	3080
1	0	0	0	62	1	130	42	376.9	588	1	0	1	0	0	0	0	0	0	1	0	0	0	1	0	7270
0	0	1	0	173	1	120	42	376.9	588	1	0	1	0	0	1	0	0	0	0	0	0	0	1	0	4568
0	1	0	0	169	2	120	46	664.9	1877	1	0	1	0	0	0	0	0	1	0	0	0	0	0	1	3946
0	1	0	0	71	1	130	45	742.6	1176	1	0	1	0	0	0	0	0	1	0	0	0	0	1	0	6000
1	0	0	0	120	2	150	46	664.9	1877	1	0	1	0	0	0	0	0	0	1	0	0	0	0	1	4144
1	0	0	0	129	2	150	46	664.9	1877	1	0	1	0	0	0	0	0	0	1	0	0	0	0	1	2598
1	0	0	0	128	1	120	50	620.1	1164	1	0	1	0	0	0	0	0	1	0	0	0	0	1	0	3549
1	0	0	0	301	1	120	39.5	372.5	735	1	0	1	0	0	0	0	0	1	0	0	0	0	1	0	1064
0	1	0	0	134	2	120	46	666.5	1139	1	0	1	0	0	0	0	0	0	1	0	0	0	0	1	300
1	0	0	0	232	1	120	39.5	372.5	735	1	0	1	0	0	0	0	0	1	0	0	0	0	1	0	2162
1	0	0	0	33	1	120	50	620.1	1164	1	0	1	0	0	0	0	0	1	0	0	0	0	1	0	5666
1	0	0	0	68	1	130	67	1493	1470	1	0	1	0	0	0	0	0	0	1	0	0	0	1	0	4912
0	1	0	0	293	1	110	29	252.3	588	1	0	0	1	1	0	0	0	0	0	0	1	0	0	0	1000
0	0	1	0	226	1	120	38.8	310.3	882	1	0	1	0	0	0	0	0	1	0	0	0	0	1	0	3995
0	1	0	0	91	1	125	56.6	705.6	1300	1	0	1	0	0	0	0	0	0	1	0	0	0	1	0	3060
0	0	1	0	85	1	120	45	742.6	1176	1	0	1	0	0	0	0	0	1	0	0	0	0	1	0	44600
0	0	1	0	142	1	120	38.3	360	588	1	0	1	0	0	0	0	0	1	0	0	0	0	1	0	11362
1	0	0	0	249	1	140	37.7	415.7	882	1	0	1	0	0	0	0	0	1	0	0	0	0	1	0	4600
1	0	0	0	222	1	120	45	539.6	882	1	0	1	0	0	0	0	0	1	0	0	0	0	1	0	4142
1	0	0	0	69	1	125	63.5	1075	1189	1	0	1	0	0	0	0	0	0	1	0	0	0	1	0	5120
0	0	1	0	49	1	130	42	376.9	588	1	0	1	0	0	0	0	0	1	0	0	0	0	1	0	4500
0	0	1	0	54	1	120	64.8	970.2	1341	1	0	1	0	0	0	0	0	1	0	0	0	0	1	0	5025
0	0	1	0	215	1	120	42.7	338.9	588	1	0	1	0	0	0	0	0	0	1	0	0	0	1	0	3886
1	0	0	0	12	1	130	64.8	1106	1470	1	0	1	0	0	0	0	0	0	1	0	0	0	1	0	554
0	0	1	0	252	1	120	60	940.5	1471	1	0	0	1	0	0	0	0	1	0	0	0	0	1	0	880
0	0	1	0	261	1	120	42.7	338.9	588	1	0	1	0	0	0	0	0	0	1	0	0	0	1	0	4964
0	0	1	0	325	1	134	29	264.4	698	1	0	1	0	0	0	0	0	0	1	0	0	0	1	0	2560
0	0	1	0	189	1	120	64.8	996	1470	1	0	1	0	0	0	0	0	1	0	0	0	0	1	0	8260
1	0	0	0	110	1	120	64.8	970.2	1341	1	0	1	0	0	0	0	0	0	1	0	0	0	1	0	5430
0	1	0	0	175	2	120	46	664.9	1877	1	0	1	0	0	0	0	0	1	0	0	0	0	0	1	3275
1	0	0	0	56	1	130	60	993.4	1433	1	0	1	0	0	0	0	0	0	1	0	0	0	1	0	19694
0	0	1	0	71	1	130	65	1162	1433	1	0	1	0	0	0	0	0	1	0	0	0	0	1	0	4736
1	0	0	0	364	1	120	47	465.9	1065	1	0	1	0	0	0	0	0	1	0	0	0	0	1	0	1700
0	1	0	0	288	1	130	80.3	1513	2207	1	0	0	1	0	0	0	0	1	0	0	0	0	1	0	35115
0	1	0	0	228	1	130	80.3	1513	2207	1	0	0	1	0	0	0	0	1	0	0	0	0	1	0	16270
0	0	1	0	271	1	120	67.2	1089	1078	1	0	1	0	0	0	0	0	0	1	0	0	0	1	0	5838
1	0	0	0	90	1	130	40.5	438.6	882	1	0	1	0	0	0	0	0	1	0	0	0	0	1	0	3412
0	0	1	0	228	1	120	39.1	320.4	771	1	0	1	0	0	0	0	0	1	0	0	0	0	1	0	4644
0	1	0	0	31	1	140	40.5	438.6	882	1	0	1	0	0	0	0	0	1	0	0	0	0	1	0	3618
0	1	0	0	134	1	140	60.3	896.7	883	1	0	0	1	1	0	0	0	0	0	1	0	0	0	0	2700
0	1	0	0	165	1	140	61.2	916.3	478	2	0	0	1	1	0	0	0	0	0	1	0	0	0	0	0
0	0	1	0	90	1	120	43	358.1	588	1	0	1	0	0	0	0	0	0	1	0	0	0	1	0	8078
1	0	0	0	302	1	120	50	620.1	1164	1	0	1	0	0	0	0	0	1	0	0	0	0	1	0	3481
1	0	0	0	120	1	130	40.5	438.6	882	1	0	1	0	0	0	0	0	1	0	0	0	0	1	0	5230
0	0	1	0	41	1	130	84.9	2382	2648	1	0	0	1	0	0	0	0	0	1	0	0	0	1	0	11600
0	0	1	0	28	1	120	42.7	338.9	588	1	0	1	0	0	0	0	0	1	0	0	0	0	1	0	3840
0	0	1	0	154	1	120	29	264.4	698	1	0	1	0	0	0	0	0	1	0	0	0	0	1	0	5645
0	0	1	0	158	2	120	46	664.7	1877	1	0	1	0	0	0	1	0	0	0	0	0	0	1	0	4700
1	0	0	0	120	1	120	64.8	970.2	1341	1	0	1	0	0	0	0	0	0	1	0	0	0	1	0	7330
0	1	0	0	114	2	150	46	664.9	1877	1	0	1	0	0	0	0	0	0	1	0	0	0	0	1	2880
0	1	0	0	163	1	120	50	620.1	1164	1	0	1	0	0	0	0	0	1	0	0	0	0	1	0	2114
0	1	0	0	252	1	135	60	993.4	1433	1	0	1	0	0	0	0	0	1	0	0	0	0	1	0	69
1	0	0	0	59	1	130	67	1493	1470	1	0	1	0	0	0	0	0	0	1	0	0	0	1	0	22108
0	1	0	0	246	1	130	80.3	1598	2207	1	0	0	1	0	0	0	0	1	0	0	0	0	1	0	6350
0	1	0	0	281	1	130	64.6	811.5	1471	1	0	0	1	0	0	0	0	1	0	0	0	0	1	0	3490
0	0	1	0	303	1	140	52.8	491.4	1212	1	0	1	0	0	0	0	0	1	0	0	0	0	1	0	5219
1	0	0	0	32	1	130	29	264.4	698	1	0	1	0	0	0	0	0	0	1	0	0	0	1	0	3605
0	0	1	0	85	1	120	39.5	372.5	735	1	0	1	0	0	0	0	0	1	0	0	0	0	1	0	11357
0	1	0	0	296	1	130	64.6	811.5	1471	1	0	0	1	0	0	0	0	1	0	0	0	0	1	0	12660
1	0	0	0	34	1	130	64.8	996	1470	1	0	1	0	0	0	0	0	1	0	0	0	0	1	0	6955
1	0	0	0	24	1	130	64.8	996	1470	1	0	1	0	0	0	0	0	1	0	0	0	0	1	0	4424
0	0	1	0	182	2	120	46	614	918	5	0	1	0	0	0	0	0	1	0	0	0	0	0	1	0
0	1	0	0	314	1	110	29	252.3	588	1	0	0	1	1	0	0	0	0	0	0	1	0	0	0	3000
1	0	0	0	124	2	120	53	929.4	1470	1	0	1	0	0	0	0	0	0	1	0	0	0	0	1	3444
0	1	0	0	65	1	120	29	264.4	698	4	0	1	0	0	0	0	0	1	0	0	0	0	1	0	0
1	0	0	0	117	1	120	64.8	970.2	1341	1	0	1	0	0	0	0	0	0	1	0	0	0	1	0	3700
0	0	0	1	77	1	130	53.6	924.3	919	1	0	0	1	0	0	0	0	0	1	0	0	0	1	0	5700
0	1	0	0	97	1	130	38.8	310.3	882	1	0	1	0	0	0	0	0	1	0	0	0	0	1	0	1887
1	0	0	0	126	2	130	53	669.3	1470	1	0	1	0	0	0	0	0	0	1	0	0	0	0	1	4835
1	0	0	0	321	1	120	50	620.1	1164	1	0	1	0	0	0	0	0	1	0	0	0	0	1	0	3030
1	0	0	0	60	1	120	37.2	388.2	588	1	0	1	0	0	0	0	0	0	1	0	0	0	1	0	4935
1	0	0	0	72	1	125	63.5	1075	1189	2	0	1	0	0	0	0	0	0	1	0	0	0	1	0	6400
1	0	0	0	298	1	120	50	620.1	1164	1	0	1	0	0	0	0	0	1	0	0	0	0	1	0	3743
1	0	0	0	221	1	120	45	539.6	882	1	0	1	0	0	0	0	0	1	0	0	0	0	1	0	3122
0	0	0	1	72	1	130	53.6	924.3	919	1	0	0	1	0	0	0	0	0	1	0	0	0	1	0	6800
1	0	0	0	214	1	120	45	539.6	882	1	0	1	0	0	0	0	0	1	0	0	0	0	1	0	6249
1	0	0	0	118	1	120	47	465.9	1065	1	0	1	0	0	0	0	0	1	0	0	0	0	1	0	5100
0	0	1	0	73	1	130	38.8	310.3	882	1	0	1	0	0	0	0	0	1	0	0	0	0	1	0	7819
1	0	0	0	87	1	140	52.8	491.4	1212	1	0	1	0	0	0	0	0	1	0	0	0	0	1	0	3888
0	0	1	0	173	1	120	29	264.4	698	1	0	1	0	0	0	0	0	1	0	0	0	0	1	0	3147
0	0	0	1	274	1	130	64.6	811.5	1471	1	0	0	1	0	0	0	0	1	0	0	0	0	1	0	36830
0	1	0	0	143	1	135	42	471	808	1	0	1	0	0	0	0	1	0	0	0	0	0	0	1	3020
0	0	1	0	250	1	130	65	1162	1433	1	0	1	0	0	0	0	0	1	0	0	0	0	1	0	7755
0	0	0	1	97	1	130	53.6	924.3	919	1	0	0	1	0	0	0	0	1	0	0	0	0	1	0	9400
0	0	1	0	180	1	120	29	264.4	698	1	0	1	0	0	0	0	0	1	0	0	0	0	1	0	3800
1	0	0	0	121	2	130	53	669.3	1470	1	0	1	0	0	0	0	0	0	1	0	0	0	0	1	4168
0	1	0	0	121	2	120	46	614	918	1	0	1	0	0	0	0	0	0	1	0	0	0	0	1	9000
1	0	0	0	32	1	125	63.5	1075	1189	1	0	1	0	0	0	0	0	0	1	0	0	0	1	0	8260
0	0	1	0	216	1	120	84.9	2382	2648	1	0	0	1	0	0	0	0	1	0	0	0	0	1	0	8300
0	0	1	0	137	1	120	39.1	320.4	771	1	0	1	0	0	0	0	0	0	1	0	0	0	1	0	6348
0	0	1	0	69	1	120	84.9	2382	2648	1	0	0	1	0	0	0	0	1	0	0	0	0	1	0	13800
1	0	0	0	141	2	120	46	664.7	1877	1	0	1	0	0	0	1	0	0	0	0	0	0	1	0	2358
1	0	0	0	307	1	138	38.8	310.3	882	1	0	1	0	0	0	0	0	0	1	0	0	0	1	0	2700
1	0	0	0	75	2	130	46	664.9	1877	1	0	1	0	0	0	0	0	1	0	0	0	0	0	1	5620
0	1	0	0	63	1	120	45	742.6	1176	1	0	1	0	0	0	0	0	1	0	0	0	0	1	0	600
0	1	0	0	155	1	140	60.3	896.7	883	1	0	0	1	1	0	0	0	0	0	1	0	0	0	0	2470
0	0	1	0	44	1	130	84.9	2382	2648	1	0	0	1	0	0	0	0	0	1	0	0	0	1	0	23400
1	0	0	0	38	1	130	60	993.4	1433	1	0	1	0	0	0	0	0	0	1	0	0	0	1	0	8736
1	0	0	0	54	1	125	63.5	1075	1189	1	0	1	0	0	0	0	0	0	1	0	0	0	1	0	25240
0	0	1	0	216	1	130	64.8	970.2	1341	1	0	1	0	0	0	0	0	1	0	0	0	0	1	0	7230
1	0	0	0	217	1	130	33	299.1	1037	1	0	1	0	0	0	0	0	1	0	0	0	0	1	0	1281
0	0	1	0	32	1	130	84.9	2382	2648	1	0	0	1	0	0	0	0	0	1	0	0	0	1	0	16100
0	0	1	0	258	1	120	39.5	372.5	735	1	0	1	0	0	0	0	0	1	0	0	0	0	1	0	3712
1	0	0	0	260	1	130	50	620.1	1164	2	0	1	0	0	0	0	0	0	1	0	0	0	1	0	0
0	0	1	0	86	1	130	84.9	2382	2648	1	0	0	1	0	0	0	0	0	1	0	0	0	1	0	8800
0	1	0	0	250	2	130	42	434.5	882	1	0	1	0	0	0	1	0	0	0	0	0	0	0	1	5000
1	0	1	0	193	1	120	64.8	1106	1470	1	0	1	0	0	0	0	0	1	0	0	0	0	1	0	1623
0	0	1	0	244	1	120	60	940.5	1471	1	0	0	1	0	0	0	0	1	0	0	0	0	1	0	22450
1	0	0	0	79	1	120	29	264.4	698	1	0	1	0	0	0	0	0	1	0	0	0	0	1	0	3440
1	0	0	0	142	1	120	42	376.9	588	1	0	1	0	0	1	0	0	0	0	0	0	0	1	0	2270
0	0	0	1	265	1	130	53.6	924.3	919	1	0	0	1	0	0	0	0	0	1	0	0	0	1	0	13000
1	0	0	0	208	1	120	38.8	310.3	882	1	0	1	0	0	0	0	0	1	0	0	0	0	1	0	3280
0	1	0	0	59	2	130	46	664.9	1877	1	0	1	0	0	0	0	0	1	0	0	0	0	0	1	208
1	0	0	0	101	1	120	47	465.9	1065	1	0	1	0	0	0	0	0	1	0	0	0	0	1	0	7900
0	1	0	0	253	1	130	80.3	1513	2207	2	0	0	1	0	0	0	0	1	0	0	0	0	1	0	0
1	0	0	0	74	2	125	46	664.9	1877	1	0	1	0	0	0	0	0	1	0	0	0	0	0	1	5580
1	0	0	0	160	1	120	54.2	1258	1470	1	0	1	0	0	0	0	0	1	0	0	0	0	1	0	4356
0	0	0	1	96	1	130	53.6	924.3	919	1	0	0	1	0	0	0	0	1	0	0	0	0	1	0	12970
1	0	0	0	19	1	120	47	465.9	1065	1	0	1	0	0	0	0	0	1	0	0	0	0	1	0	6160
0	1	0	0	92	1	120	45	742.6	1176	1	0	1	0	0	0	0	0	1	0	0	0	0	1	0	368
0	0	1	0	50	1	120	64.8	970.2	1341	1	0	1	0	0	0	0	0	1	0	0	0	0	1	0	7445
0	0	1	0	310	1	120	39.5	372.5	735	1	0	1	0	0	0	0	0	1	0	0	0	0	1	0	4004
1	0	0	0	88	1	130	65	1162	1433	1	0	1	0	0	0	0	0	1	0	0	0	0	1	0	6831
1	0	0	0	338	1	120	50	620.1	1164	1	0	1	0	0	0	0	0	1	0	0	0	0	1	0	4889
0	0	1	0	317	1	120	60	940.5	1471	1	0	0	1	0	0	0	0	1	0	0	0	0	1	0	850
1	0	0	0	161	1	120	64.8	996	1470	1	0	1	0	0	0	0	0	1	0	0	0	0	1	0	4193
1	0	0	0	151	1	120	47	465.9	1065	1	0	1	0	0	0	0	0	0	1	0	0	0	1	0	4549
1	1	0	0	85	1	120	39.1	320.4	771	1	0	1	0	0	0	0	0	0	1	0	0	0	1	0	3234
0	0	1	0	192	1	130	33	299.1	1037	1	0	1	0	0	0	0	0	1	0	0	0	0	1	0	4265
0	1	0	0	105	1	130	53.6	924.3	919	6	0	0	1	0	0	0	0	0	1	0	0	0	1	0	0
0	0	1	0	141	1	120	29	264.4	698	1	0	1	0	0	0	0	0	1	0	0	0	0	1	0	8620
0	0	1	0	224	1	130	80.3	1598	2207	1	0	0	1	0	0	0	0	1	0	0	0	0	1	0	2500
0	0	0	1	106	1	130	53.6	924.3	919	1	0	0	1	0	0	0	0	1	0	0	0	0	1	0	10950
0	0	1	0	283	1	120	39.5	372.5	735	1	0	1	0	0	0	0	0	1	0	0	0	0	1	0	3632
0	1	0	0	172	1	140	61.2	916.3	478	2	0	0	1	1	0	0	0	0	0	1	0	0	0	0	0
1	0	0	0	102	1	125	63.5	1075	1189	1	0	1	0	0	0	0	0	0	1	0	0	0	1	0	9980
0	1	0	0	74	2	120	46	664.9	1877	1	0	1	0	0	0	0	0	1	0	0	0	0	0	1	1630
0	0	1	0	289	1	130	80.3	1598	2207	1	0	0	1	0	0	0	0	1	0	0	0	0	1	0	13000
1	0	0	0	239	1	138	38.8	310.3	882	1	0	1	0	0	0	0	0	0	1	0	0	0	1	0	3375
0	0	0	1	59	1	136	39.5	372.5	735	1	0	1	0	0	0	0	0	1	0	0	0	0	1	0	3667
0	1	0	0	117	1	140	61.2	916.3	478	2	0	0	1	1	0	0	0	0	0	1	0	0	0	0	160
0	0	1	0	222	1	120	42.7	338.9	588	1	0	1	0	0	0	0	0	0	1	0	0	0	1	0	2945
1	0	0	0	318	1	140	37.7	415.7	882	1	0	1	0	0	0	0	0	1	0	0	0	0	1	0	2606
1	0	0	0	85	1	130	64.8	970.2	1341	1	0	1	0	0	0	0	0	0	1	0	0	0	1	0	4170
0	0	1	0	212	1	130	65	1162	1433	1	0	1	0	0	0	0	0	1	0	0	0	0	1	0	4524
0	0	1	0	305	1	120	60	940.5	1471	1	0	0	1	0	0	0	0	1	0	0	0	0	1	0	620
0	0	1	0	147	1	120	43	358.1	588	1	0	1	0	0	0	0	0	1	0	0	0	0	1	0	14637
1	0	0	0	29	1	130	64.8	970.2	1341	2	0	1	0	0	0	0	0	0	1	0	0	0	1	0	11400
1	0	0	0	16	1	120	47	465.9	1065	1	0	1	0	0	0	0	0	1	0	0	0	0	1	0	4800
1	0	0	0	57	1	130	58.2	813.6	1043	1	0	1	0	0	0	0	0	0	1	0	0	0	1	0	17300
1	0	0	0	21	1	120	64.8	970.2	1341	1	0	1	0	0	0	0	0	1	0	0	0	0	1	0	9280
1	0	0	0	110	1	130	40.5	438.6	882	1	0	1	0	0	0	0	0	1	0	0	0	0	1	0	2140
0	0	1	0	171	2	120	46	666.5	1139	2	0	1	0	0	0	0	0	1	0	0	0	0	0	1	6000
0	1	0	0	97	1	120	47	465.9	1065	1	0	1	0	0	0	0	0	1	0	0	0	0	1	0	5500
0	0	1	0	255	2	130	42	434.5	882	1	0	1	0	0	0	1	0	0	0	0	0	0	0	1	12600
1	0	0	0	57	2	130	46	664.9	1877	1	0	1	0	0	0	0	0	1	0	0	0	0	0	1	870
0	1	0	0	87	1	130	53.6	924.3	919	2	0	0	1	0	0	0	0	0	1	0	0	0	1	0	0
0	1	0	0	149	1	140	60.3	896.7	883	1	0	0	1	1	0	0	0	0	0	1	0	0	0	0	665
0	0	1	0	149	1	130	63.5	1075	1189	1	0	1	0	0	0	0	0	1	0	0	0	0	1	0	12060
1	0	0	0	136	1	120	50	620.1	1164	1	0	1	0	0	0	0	0	1	0	0	0	0	1	0	4593
1	0	0	0	50	1	130	64.8	970.2	1341	1	0	1	0	0	0	0	0	0	1	0	0	0	1	0	18860
0	0	1	0	322	1	120	60	940.5	1471	1	0	0	1	0	0	0	0	1	0	0	0	0	1	0	400
0	0	1	0	228	1	120	64.8	1106	1470	1	0	1	0	0	0	0	0	1	0	0	0	0	1	0	7470
0	1	0	0	60	1	130	29	264.4	698	1	0	1	0	0	0	0	0	0	1	0	0	0	1	0	4760
0	1	0	0	231	2	130	42	434.5	882	1	0	1	0	0	0	1	0	0	0	0	0	0	0	1	700
0	1	0	0	159	2	120	46	664.9	1877	2	0	1	0	0	0	0	0	1	0	0	0	0	0	1	4066
0	1	0	0	292	2	130	42	434.5	882	1	0	1	0	0	0	1	0	0	0	0	0	0	0	1	600
1	0	0	0	47	1	120	50	620.1	1164	1	0	1	0	0	0	0	0	1	0	0	0	0	1	0	1490
1	1	0	0	30	1	130	39.1	320.4	771	1	0	1	0	0	0	0	0	0	1	0	0	0	1	0	2531
1	0	0	0	16	1	130	64.8	996	1470	1	0	1	0	0	0	0	0	1	0	0	0	0	1	0	7570
0	0	1	0	90	1	120	42.7	338.9	588	1	0	1	0	0	0	0	0	1	0	0	0	0	1	0	3348
1	0	0	0	90	2	130	46	664.9	1877	1	0	1	0	0	0	0	0	1	0	0	0	0	0	1	600
0	0	1	0	208	1	130	65	1162	1433	1	0	1	0	0	0	0	0	1	0	0	0	0	1	0	5808
0	0	1	0	233	1	130	65	1162	1433	1	0	1	0	0	0	0	0	1	0	0	0	0	1	0	5634
1	0	0	0	126	1	125	56.6	705.6	1300	1	0	1	0	0	0	0	0	0	1	0	0	0	1	0	4985
1	0	0	0	43	1	125	63.5	1075	1189	1	0	1	0	0	0	0	0	0	1	0	0	0	1	0	14000
0	0	1	0	327	1	134	29	264.4	698	1	0	1	0	0	0	0	0	0	1	0	0	0	1	0	3000
0	1	0	0	279	1	135	60	993.4	1433	1	0	1	0	0	0	0	0	1	0	0	0	0	1	0	4111
0	1	0	0	142	1	135	42	471	808	1	0	1	0	0	0	0	1	0	0	0	0	0	0	1	5018
0	0	1	0	107	1	135	80.3	1598	2207	1	0	0	1	0	0	0	0	1	0	0	0	0	1	0	3650
0	0	0	1	146	2	120	46	664.9	1877	1	0	1	0	0	0	0	0	1	0	0	0	0	0	1	1662
0	1	0	0	188	1	142	44.8	756	1103	1	1	0	0	0	0	0	0	1	0	0	0	0	1	0	2075
0	0	1	0	175	2	120	46	666.5	1139	1	0	1	0	0	0	0	0	1	0	0	0	0	0	1	4000
0	0	1	0	222	1	130	80.3	1598	2207	1	0	0	1	0	0	0	0	1	0	0	0	0	1	0	2650
1	0	0	0	148	1	120	42	376.9	588	1	0	1	0	0	1	0	0	0	0	0	0	0	1	0	3980
1	0	0	0	240	1	120	45	539.6	882	1	0	1	0	0	0	0	0	1	0	0	0	0	1	0	1714
0	1	0	0	94	2	120	46	664.9	1877	1	0	1	0	0	0	0	0	1	0	0	0	0	0	1	3755
0	0	1	0	76	1	140	52.8	491.4	1212	1	0	1	0	0	0	0	0	1	0	0	0	0	1	0	8948
0	0	1	1	89	1	120	84.9	2382	2648	1	0	0	1	0	0	0	0	1	0	0	0	0	1	0	7300
0	0	1	0	78	1	130	42	376.9	588	1	0	1	0	0	0	0	0	1	0	0	0	1	0	0	6990
0	1	0	0	120	2	130	46	664.9	1877	1	0	1	0	0	0	0	0	0	1	0	0	0	0	1	2747
0	1	0	0	170	2	120	46	664.9	1877	1	0	1	0	0	0	0	0	1	0	0	0	0	0	1	2736
1	0	0	0	22	1	130	64.8	1106	1470	1	0	1	0	0	0	0	0	0	1	0	0	0	1	0	4896
0	0	0	1	74	1	120	42.7	338.9	588	1	0	1	0	0	0	0	0	1	0	0	0	0	1	0	3059
0	0	1	0	257	1	140	52.8	491.4	1212	1	0	1	0	0	0	0	0	1	0	0	0	0	1	0	5300
1	0	0	0	198	1	140	37.7	415.7	882	1	0	1	0	0	0	0	0	1	0	0	0	0	1	0	2960
1	0	0	0	159	1	120	29	264.4	698	1	0	1	0	0	0	0	0	1	0	0	0	0	1	0	2480
1	0	0	0	77	1	120	37.2	388.2	588	1	0	1	0	0	0	0	0	0	1	0	0	0	1	0	3725
1	0	0	0	161	1	120	54.2	1258	1470	1	0	1	0	0	0	0	0	1	0	0	0	0	1	0	4136
0	0	1	0	258	1	120	38.3	360	588	1	0	1	0	0	0	0	0	1	0	0	0	0	1	0	414
1	0	0	0	147	1	120	50	620.1	1164	1	0	1	0	0	0	0	0	1	0	0	0	0	1	0	2465
0	1	0	0	17	1	140	40.5	438.6	882	1	0	1	0	0	0	0	0	1	0	0	0	0	1	0	1052
0	0	0	1	157	1	120	37.2	388.2	588	1	0	1	0	0	0	0	0	0	1	0	0	0	1	0	4900
1	0	0	0	182	1	120	45	539.6	882	2	0	1	0	0	0	0	0	1	0	0	0	0	1	0	0
0	0	0	1	77	1	130	53.6	924.3	919	1	0	0	1	0	0	0	0	1	0	0	0	0	1	0	15800
0	0	1	0	264	1	130	65	1162	1433	1	0	1	0	0	0	0	0	1	0	0	0	0	1	0	8193
1	0	0	0	42	1	130	64.8	996	1470	1	0	1	0	0	0	0	0	1	0	0	0	0	1	0	6478
1	0	0	0	171	1	120	64.8	996	1470	1	0	1	0	0	0	0	0	1	0	0	0	0	1	0	4375
1	0	0	0	52	1	120	50	620.1	1164	1	0	1	0	0	0	0	0	1	0	0	0	0	1	0	4195
1	0	0	0	41	1	130	42	376.9	588	1	0	1	0	0	0	0	0	1	0	0	0	0	1	0	3330
0	1	0	0	295	2	130	42	434.5	882	2	0	1	0	0	0	1	0	0	0	0	0	0	0	1	0
0	1	0	0	69	1	130	64.8	996	1470	1	0	1	0	0	0	0	0	1	0	0	0	0	1	0	3530
1	0	0	0	125	1	120	47	465.9	1065	1	0	1	0	0	0	0	0	1	0	0	0	0	1	0	6700
0	1	0	0	180	2	120	46	664.9	1877	2	0	1	0	0	0	0	0	1	0	0	0	0	0	1	0
1	0	0	0	218	1	130	33	299.1	1037	1	0	1	0	0	0	0	0	1	0	0	0	0	1	0	3457
0	1	0	0	36	2	125	46	664.9	1877	1	0	1	0	0	0	0	0	1	0	0	0	0	0	1	9000
1	0	0	0	260	1	140	37.7	415.7	882	1	0	1	0	0	0	0	0	1	0	0	0	0	1	0	2517
0	1	0	0	225	1	130	80.3	1598	2207	1	0	0	1	0	0	0	0	1	0	0	0	0	1	0	9215
0	1	0	0	258	1	130	80.3	1513	2207	1	0	0	1	0	0	0	0	1	0	0	0	0	1	0	11095
0	0	1	0	269	1	120	43	358.1	588	1	0	1	0	0	0	0	0	1	0	0	0	0	1	0	3312
1	0	0	0	169	1	120	64.8	996	1470	1	0	1	0	0	0	0	0	1	0	0	0	0	1	0	4425
0	0	1	0	80	1	130	84.9	2382	2648	1	0	0	1	0	0	0	0	0	1	0	0	0	1	0	3000
0	1	0	0	291	1	140	60.3	896.7	883	1	0	0	1	1	0	0	0	0	0	1	0	0	0	0	5707
0	0	1	0	228	1	120	42.7	338.9	588	1	0	1	0	0	0	0	0	0	1	0	0	0	1	0	3667
0	1	0	0	78	1	120	47	465.9	1065	1	0	1	0	0	0	0	0	1	0	0	0	0	1	0	5800
0	1	0	0	182	1	142	44.8	756	1103	1	1	0	0	0	0	0	0	1	0	0	0	0	1	0	2918
0	1	0	0	251	2	130	42	434.5	882	1	0	1	0	0	0	1	0	0	0	0	0	0	0	1	500
1	0	0	0	9	1	130	60	993.4	1433	1	0	1	0	0	0	0	0	0	1	0	0	0	1	0	4201
1	0	0	0	8	1	130	60	993.4	1433	1	0	1	0	0	0	0	0	0	1	0	0	0	1	0	4168
0	1	0	0	111	2	120	45	742.6	1176	1	0	1	0	0	0	0	0	0	1	0	0	0	0	1	3036
1	0	0	0	70	1	120	54.2	1258	1470	1	0	1	0	0	0	0	0	1	0	0	0	0	1	0	3586
0	0	1	0	228	1	125	56.6	705.6	1300	1	0	1	0	0	0	0	0	1	0	0	0	0	1	0	4655
0	0	1	0	148	1	135	80.3	1598	2207	1	0	0	1	0	0	0	0	1	0	0	0	0	1	0	8950
0	1	0	0	53	1	130	45	742.6	1176	1	0	1	0	0	0	0	0	1	0	0	0	0	1	0	1190
0	0	1	0	271	1	120	38.3	360	588	1	0	1	0	0	0	0	0	1	0	0	0	0	1	0	3208
0	1	0	0	272	1	140	61.2	916.3	478	1	0	0	1	1	0	0	0	0	0	1	0	0	0	0	400
0	1	0	0	286	1	130	80.3	1513	2207	1	0	0	1	0	0	0	0	1	0	0	0	0	1	0	8290
1	0	0	0	31	1	125	63.5	1075	1189	1	0	1	0	0	0	0	0	0	1	0	0	0	1	0	6360
0	0	1	0	66	1	130	65	1162	1433	1	0	1	0	0	0	0	0	1	0	0	0	0	1	0	4061
0	1	0	0	125	2	120	46	614	918	1	0	1	0	0	0	1	0	0	0	0	0	0	0	1	1000
0	0	1	0	206	1	120	38.3	360	588	1	0	1	0	0	0	0	0	1	0	0	0	0	1	0	3808
1	0	0	0	280	1	140	37.7	415.7	882	1	0	1	0	0	0	0	0	1	0	0	0	0	1	0	1302
1	0	0	0	59	1	130	64.8	1106	1470	1	0	1	0	0	0	0	0	0	1	0	0	0	1	0	21380
0	1	0	0	35	1	120	47	465.9	1065	1	0	1	0	0	0	0	0	1	0	0	0	0	1	0	3370
0	1	0	0	250	1	140	61.2	916.3	478	1	0	0	1	1	0	0	0	0	0	0	1	0	0	0	1045
0	0	1	0	66	1	120	84.9	2382	2648	1	0	0	1	0	0	0	0	1	0	0	0	0	1	0	6300
1	0	0	0	57	1	130	64.8	1106	1470	1	0	1	0	0	0	0	0	0	1	0	0	0	1	0	12355
1	0	0	0	180	1	120	33	299.1	1037	1	0	1	0	0	0	0	0	1	0	0	0	0	1	0	3250
0	0	1	0	141	1	135	80.3	1598	2207	1	0	0	1	0	0	0	0	1	0	0	0	0	1	0	6450
0	0	0	1	67	1	136	39.5	372.5	735	1	0	1	0	0	0	0	0	1	0	0	0	0	1	0	4854
0	0	1	0	272	1	140	52.8	491.4	1212	1	0	1	0	0	0	0	0	1	0	0	0	0	1	0	8738
1	0	0	0	4	1	130	64.8	996	1470	1	0	1	0	0	0	0	0	1	0	0	0	0	1	0	8532
0	1	0	0	46	1	120	47	465.9	1065	1	0	1	0	0	0	0	0	1	0	0	0	0	1	0	3325
1	0	0	0	131	1	120	64.8	996	1470	1	0	1	0	0	0	0	0	1	0	0	0	0	1	0	4190
1	0	0	0	107	1	120	54.2	1258	1470	1	0	1	0	0	0	0	0	1	0	0	0	0	1	0	6556
0	0	1	0	107	1	120	47	465.9	1065	1	0	1	0	0	0	0	0	1	0	0	0	0	1	0	3600
0	0	1	0	145	1	135	80.3	1598	2207	1	0	0	1	0	0	0	0	1	0	0	0	0	1	0	8200
0	1	0	0	65	1	120	47	465.9	1065	1	0	1	0	0	0	0	0	1	0	0	0	0	1	0	5950
1	0	0	0	353	1	120	47	465.9	1065	1	0	1	0	0	0	0	0	1	0	0	0	0	1	0	4900
0	0	1	0	203	1	130	33	299.1	1037	1	0	1	0	0	0	0	0	1	0	0	0	0	1	0	3162
0	1	0	0	196	1	120	45	539.6	882	1	0	1	0	0	0	0	0	1	0	0	0	0	1	0	2928
0	0	0	1	175	1	120	45	539.6	882	1	0	1	0	0	0	0	0	1	0	0	0	0	1	0	5698
0	1	0	0	20	1	140	40.5	438.6	882	1	0	1	0	0	0	0	0	1	0	0	0	0	1	0	1749
1	0	0	0	39	1	120	50	620.1	1164	1	0	1	0	0	0	0	0	1	0	0	0	0	1	0	5652
0	0	1	0	49	1	120	42.7	338.9	588	1	0	1	0	0	0	0	0	1	0	0	0	0	1	0	3307
0	1	0	0	244	1	130	80.3	1513	2207	1	0	0	1	0	0	0	0	1	0	0	0	0	1	0	6190
0	1	0	0	298	1	110	29	252.3	588	2	0	0	1	1	0	0	0	0	0	0	1	0	0	0	0
1	0	0	0	75	1	130	64.8	996	1470	1	0	1	0	0	0	0	0	1	0	0	0	0	1	0	1941
1	0	0	0	305	1	120	50	620.1	1164	1	0	1	0	0	0	0	0	1	0	0	0	0	1	0	2324
0	1	0	0	85	1	140	60.3	896.7	883	1	0	0	1	1	0	0	0	0	0	1	0	0	0	0	4725
0	1	0	0	236	1	130	80.3	1513	2207	1	0	0	1	0	0	0	0	1	0	0	0	0	1	0	23020
0	1	0	0	117	1	120	64.8	996	1470	1	0	1	0	0	0	0	0	1	0	0	0	0	1	0	3930
0	1	0	0	59	2	125	46	664.9	1877	1	0	1	0	0	0	0	0	1	0	0	0	0	0	1	160
0	1	0	0	92	2	120	46	664.9	1877	1	0	1	0	0	0	0	0	1	0	0	0	0	0	1	4554
0	0	1	0	74	1	130	38.8	310.3	882	1	0	1	0	0	0	0	0	1	0	0	0	0	1	0	6060
1	0	0	0	97	1	120	29	264.4	698	1	0	1	0	0	0	0	0	1	0	0	0	0	1	0	4640
1	0	0	0	40	1	130	39.1	320.4	771	1	0	1	0	0	0	0	0	0	1	0	0	0	1	0	3852
0	1	0	0	91	1	120	50	620.1	1164	2	0	1	0	0	0	0	0	1	0	0	0	0	1	0	0
1	0	0	0	42	1	130	64.8	970.2	1341	1	0	1	0	0	0	0	0	0	1	0	0	0	1	0	20700
1	0	0	0	75	1	130	58.2	813.6	1043	1	0	1	0	0	0	0	0	0	1	0	0	0	1	0	5903
0	0	1	0	151	2	120	46	614	918	9	0	1	0	0	0	0	0	1	0	0	0	0	0	1	0
0	1	0	0	237	2	130	42	434.5	882	1	0	1	0	0	0	1	0	0	0	0	0	0	0	1	1200
1	0	0	0	77	1	120	50	620.1	1164	1	0	1	0	0	0	0	0	1	0	0	0	0	1	0	1944
0	1	0	0	160	1	140	60.3	896.7	883	1	0	0	1	1	0	0	0	0	0	1	0	0	0	0	3295
0	0	1	0	157	2	120	46	666.5	1139	1	0	1	0	0	0	0	0	1	0	0	0	0	0	1	2000
0	0	1	0	162	1	120	38.3	360	588	1	0	1	0	0	0	0	0	1	0	0	0	0	1	0	3110
0	0	1	0	273	1	120	58.2	813.6	1043	1	0	1	0	0	0	0	0	1	0	0	0	0	1	0	7440
0	1	0	0	112	1	120	50	620.1	1164	1	0	1	0	0	0	0	0	1	0	0	0	0	1	0	4209
0	0	1	0	133	1	130	58.2	813.6	1043	1	0	1	0	0	0	0	0	1	0	0	0	0	1	0	5472
1	0	0	0	238	1	120	39.5	372.5	735	1	0	1	0	0	0	0	0	1	0	0	0	0	1	0	4248
0	0	1	0	191	1	120	64.8	996	1470	1	0	1	0	0	0	0	0	1	0	0	0	0	1	0	4215
1	0	0	0	82	1	130	67	1493	1470	1	0	1	0	0	0	0	0	0	1	0	0	0	1	0	4864
0	1	0	0	339	1	120	60	940.5	1471	1	0	0	1	0	0	0	0	1	0	0	0	0	1	0	2420
1	0	0	0	141	1	120	64.8	996	1470	1	0	1	0	0	0	0	0	1	0	0	0	0	1	0	7030
0	0	1	0	146	2	120	46	664.7	1877	1	0	1	0	0	0	1	0	0	0	0	0	0	1	0	6112
0	0	1	0	112	1	135	80.3	1598	2207	1	0	0	1	0	0	0	0	1	0	0	0	0	1	0	5300
0	0	1	0	218	1	120	84.9	2382	2648	1	0	0	1	0	0	0	0	1	0	0	0	0	1	0	9600
1	0	0	0	52	1	120	37.2	388.2	588	1	0	1	0	0	0	0	0	0	1	0	0	0	1	0	640
0	1	0	0	110	2	120	45	742.6	1176	1	0	1	0	0	0	0	0	0	1	0	0	0	0	1	828
0	1	0	0	245	2	130	42	434.5	882	1	0	1	0	0	0	1	0	0	0	0	0	0	0	1	500
1	0	0	0	361	1	120	47	465.9	1065	1	0	1	0	0	0	0	0	1	0	0	0	0	1	0	2600
1	0	0	0	138	1	130	38.8	310.3	882	1	0	1	0	0	0	0	0	1	0	0	0	0	1	0	2371
0	1	0	0	123	2	125	43.1	494.5	845	2	0	1	0	0	0	0	1	0	0	0	0	0	0	1	0
1	0	0	0	105	1	120	64.8	996	1470	1	0	1	0	0	0	0	0	1	0	0	0	0	1	0	3555
0	0	1	0	181	2	120	46	666.5	1139	1	0	1	0	0	0	0	0	1	0	0	0	0	0	1	4000
1	0	0	0	18	1	130	60	993.4	1433	1	0	1	0	0	0	0	0	0	1	0	0	0	1	0	6565
0	0	1	0	263	1	120	60	940.5	1471	1	0	0	1	0	0	0	0	1	0	0	0	0	1	0	460
1	0	0	0	35	1	125	63.5	1075	1189	1	0	1	0	0	0	0	0	0	1	0	0	0	1	0	19331
0	0	1	0	129	1	130	63.5	1075	1189	1	0	1	0	0	0	0	0	1	0	0	0	0	1	0	8400
0	0	1	0	172	1	120	42	376.9	588	1	0	1	0	0	1	0	0	0	0	0	0	0	1	0	5432
1	0	1	0	124	1	120	39.1	320.4	771	1	0	1	0	0	0	0	0	0	1	0	0	0	1	0	6246
1	0	0	0	142	1	120	64.8	970.2	1341	1	0	1	0	0	0	0	0	0	1	0	0	0	1	0	5400
1	0	0	0	102	1	130	65	1162	1433	1	0	1	0	0	0	0	0	1	0	0	0	0	1	0	4338
0	1	0	0	54	1	120	45	742.6	1176	1	0	1	0	0	0	0	0	1	0	0	0	0	1	0	2704
0	1	0	0	33	1	120	47	465.9	1065	1	0	1	0	0	0	0	0	1	0	0	0	0	1	0	5200
1	0	0	0	36	1	130	64.8	1106	1470	1	0	1	0	0	0	0	0	0	1	0	0	0	1	0	2707
1	0	0	0	118	1	120	64.8	970.2	1341	1	0	1	0	0	0	0	0	0	1	0	0	0	1	0	6450
1	0	0	0	90	1	130	38.8	310.3	882	1	0	1	0	0	0	0	0	1	0	0	0	0	1	0	4564
0	0	1	0	196	1	120	38.3	360	588	1	0	1	0	0	0	0	0	1	0	0	0	0	1	0	2464
1	0	0	0	241	1	140	37.7	415.7	882	1	0	1	0	0	0	0	0	1	0	0	0	0	1	0	2082
1	0	0	0	77	1	130	64.8	970.2	1341	1	0	1	0	0	0	0	0	0	1	0	0	0	1	0	4000
1	0	0	0	153	1	120	64.8	996	1470	1	0	1	0	0	0	0	0	1	0	0	0	0	1	0	6096
0	0	1	0	145	2	120	46	664.7	1877	1	0	1	0	0	0	1	0	0	0	0	0	0	1	0	9702
0	1	0	0	56	1	130	29	264.4	698	1	0	1	0	0	0	0	0	0	1	0	0	0	1	0	3525
1	0	0	0	74	1	120	29	264.4	698	1	0	1	0	0	0	0	0	1	0	0	0	0	1	0	2120
1	0	0	0	135	1	130	40.5	438.6	882	1	0	1	0	0	0	0	0	1	0	0	0	0	1	0	2640
0	1	0	0	67	1	120	45	742.6	1176	1	0	1	0	0	0	0	0	1	0	0	0	0	1	0	1470
0	0	1	1	147	1	120	45	539.6	882	1	0	1	0	0	0	0	0	1	0	0	0	0	1	0	1547
1	0	0	0	157	1	120	54.2	1258	1470	1	0	1	0	0	0	0	0	1	0	0	0	0	1	0	7062
1	0	0	0	197	1	120	45	539.6	882	1	0	1	0	0	0	0	0	1	0	0	0	0	1	0	2039
1	0	0	0	138	2	120	46	664.7	1877	1	0	1	0	0	0	1	0	0	0	0	0	0	1	0	2573
1	0	0	0	70	1	120	38.3	360	588	1	0	1	0	0	0	0	0	1	0	0	0	0	1	0	1438
1	0	0	0	48	1	130	42	376.9	588	1	0	1	0	0	0	0	0	0	1	0	0	0	1	0	7990
1	0	0	0	122	1	120	50	620.1	1164	5	0	1	0	0	0	0	0	1	0	0	0	0	1	0	0
0	0	1	0	276	1	130	80.3	1598	2207	1	0	0	1	0	0	0	0	1	0	0	0	0	1	0	11100
0	0	1	0	149	1	135	80.3	1598	2207	1	0	0	1	0	0	0	0	1	0	0	0	0	1	0	7850
0	1	0	0	284	1	140	61.2	916.3	478	1	0	0	1	1	0	0	0	0	0	1	0	0	0	0	655
0	0	1	0	232	1	120	42.7	338.9	588	1	0	1	0	0	0	0	0	0	1	0	0	0	1	0	3883
1	0	0	0	300	1	120	50	620.1	1164	1	0	1	0	0	0	0	0	1	0	0	0	0	1	0	2431
1	0	0	0	47	1	125	63.5	1075	1189	1	0	1	0	0	0	0	0	0	1	0	0	0	1	0	21500
1	0	0	0	130	2	120	45	742.6	1176	1	0	1	0	0	0	0	0	0	1	0	0	0	0	1	3320
0	1	0	0	165	2	120	46	664.9	1877	1	0	1	0	0	0	0	0	1	0	0	0	0	0	1	570
0	0	1	0	225	1	120	39.1	320.4	771	1	0	1	0	0	0	0	0	1	0	0	0	0	1	0	4932
0	0	1	0	286	1	120	39.5	372.5	735	1	0	1	0	0	0	0	0	1	0	0	0	0	1	0	6032
1	0	0	0	199	1	120	45	539.6	882	1	0	1	0	0	0	0	0	1	0	0	0	0	1	0	2652
1	0	0	0	43	1	130	58.2	813.6	1043	1	0	1	0	0	0	0	0	0	1	0	0	0	1	0	28930
1	0	0	0	22	1	140	40.5	438.6	882	1	0	1	0	0	0	0	0	1	0	0	0	0	1	0	1782
0	1	0	0	240	1	130	80.3	1513	2207	1	0	0	1	0	0	0	0	1	0	0	0	0	1	0	6660
1	0	0	0	32	1	130	64.8	970.2	1341	1	0	1	0	0	0	0	0	0	1	0	0	0	1	0	11910
1	0	0	0	105	1	130	64.8	970.2	1341	1	0	1	0	0	0	0	0	0	1	0	0	0	1	0	5120
0	1	0	0	115	1	120	37.2	388.2	588	1	0	1	0	0	0	0	0	0	1	0	0	0	1	0	4750
1	0	0	0	154	1	120	64.8	996	1470	1	0	1	0	0	0	0	0	1	0	0	0	0	1	0	3630
1	0	0	0	54	1	120	37.2	388.2	588	1	0	1	0	0	0	0	0	0	1	0	0	0	1	0	2640
0	0	1	0	285	1	120	38.3	360	588	1	0	1	0	0	0	0	0	1	0	0	0	0	1	0	345
1	0	0	0	319	1	134	38.3	360	588	1	0	1	0	0	0	0	0	0	1	0	0	0	1	0	1831
0	0	1	0	116	1	130	58.2	813.6	1043	1	0	1	0	0	0	0	0	1	0	0	0	0	1	0	4710
1	0	0	0	135	1	120	64.8	970.2	1341	1	0	1	0	0	0	0	0	0	1	0	0	0	1	0	6050
1	0	0	0	97	1	120	37.2	388.2	588	1	0	1	0	0	0	0	0	0	1	0	0	0	1	0	5725
1	0	0	0	46	1	130	58.2	813.6	1043	1	0	1	0	0	0	0	0	0	1	0	0	0	1	0	19656
0	0	1	0	167	2	120	46	666.5	1139	2	0	1	0	0	0	0	0	1	0	0	0	0	0	1	4000
0	0	1	0	72	1	130	84.9	2382	2648	1	0	0	1	0	0	0	0	0	1	0	0	0	1	0	7700
0	0	1	0	78	1	135	80.3	1598	2207	1	0	0	1	0	0	0	0	1	0	0	0	0	1	0	7700
1	0	0	0	140	1	120	50	620.1	1164	1	0	1	0	0	0	0	0	1	0	0	0	0	1	0	4294
1	0	0	0	88	1	130	42	376.9	588	1	0	1	0	0	0	0	0	1	0	0	0	1	0	0	6080
0	1	0	0	86	1	140	60.3	896.7	883	1	0	0	1	1	0	0	0	0	0	1	0	0	0	0	4225
0	0	1	0	90	1	120	29	264.4	698	1	0	1	0	0	0	0	0	1	0	0	0	0	1	0	8960
1	0	0	0	56	1	125	63.5	1075	1189	1	0	1	0	0	0	0	0	0	1	0	0	0	1	0	32980
0	0	1	0	188	1	120	33	299.1	1037	1	0	1	0	0	0	0	0	1	0	0	0	0	1	0	3225
0	1	0	0	172	2	120	46	664.9	1877	2	0	1	0	0	0	0	0	1	0	0	0	0	0	1	0
1	0	0	0	67	1	130	42	376.9	588	1	0	1	0	0	0	0	0	0	1	0	0	0	1	0	6140
0	1	0	0	116	2	130	46	664.9	1877	1	0	1	0	0	0	0	0	0	1	0	0	0	0	1	2159
0	1	0	0	28	1	130	42	376.9	588	1	0	1	0	0	0	0	0	1	0	0	0	0	1	0	1250
0	0	1	0	33	1	120	64.8	970.2	1341	1	0	1	0	0	0	0	0	1	0	0	0	0	1	0	10345
1	0	0	0	102	1	125	56.6	705.6	1300	1	0	1	0	0	0	0	0	0	1	0	0	0	1	0	5260
1	0	0	0	53	1	125	63.5	1075	1189	1	0	1	0	0	0	0	0	0	1	0	0	0	1	0	27760
1	0	0	0	86	1	130	64.8	970.2	1341	1	0	1	0	0	0	0	0	0	1	0	0	0	1	0	3280
1	0	0	0	58	1	125	63.5	1075	1189	1	0	1	0	0	0	0	0	0	1	0	0	0	1	0	17500
0	0	1	0	89	1	120	38.3	360	588	1	0	1	0	0	0	0	0	1	0	0	0	0	1	0	4324
0	0	1	0	315	1	120	60	940.5	1471	1	0	0	1	0	0	0	0	1	0	0	0	0	1	0	750
1	0	0	0	235	1	138	38.8	310.3	882	1	0	1	0	0	0	0	0	0	1	0	0	0	1	0	2875
0	0	1	0	131	1	120	38.3	360	588	1	0	1	0	0	0	0	0	1	0	0	0	0	1	0	12461
1	0	0	0	241	1	120	45	539.6	882	1	0	1	0	0	0	0	0	1	0	0	0	0	1	0	1970
0	0	1	0	274	1	120	84.9	2382	2648	1	0	0	1	0	0	0	0	1	0	0	0	0	1	0	5000
0	1	0	0	283	2	130	42	434.5	882	1	0	1	0	0	0	1	0	0	0	0	0	0	0	1	500
1	0	0	0	266	1	140	37.7	415.7	882	1	0	1	0	0	0	0	0	1	0	0	0	0	1	0	2823
1	0	0	0	29	1	130	58.2	813.6	1043	1	0	1	0	0	0	0	0	0	1	0	0	0	1	0	7648
1	0	0	0	81	1	125	63.5	1075	1189	1	0	1	0	0	0	0	0	0	1	0	0	0	1	0	3200
1	0	0	0	40	1	130	64.8	970.2	1341	1	0	1	0	0	0	0	0	0	1	0	0	0	1	0	13840
0	0	1	0	213	1	130	65	1162	1433	1	0	1	0	0	0	0	0	1	0	0	0	0	1	0	5460
0	1	0	0	246	1	130	80.3	1513	2207	1	0	0	1	0	0	0	0	1	0	0	0	0	1	0	6730
0	1	0	0	162	2	120	46	664.9	1877	1	0	1	0	0	0	0	0	1	0	0	0	0	0	1	12288
0	1	0	0	162	2	120	46	664.7	1877	1	0	1	0	0	0	1	0	0	0	0	0	0	1	0	6540
0	0	1	0	50	1	120	42.7	338.9	588	1	0	1	0	0	0	0	0	1	0	0	0	0	1	0	2248
1	0	0	0	163	1	120	45	539.6	882	1	0	1	0	0	0	0	0	1	0	0	0	0	1	0	5648
1	1	0	0	119	2	120	45	742.6	1176	1	0	1	0	0	0	0	0	0	1	0	0	0	0	1	3169
0	1	0	0	113	2	120	46	614	918	3	0	1	0	0	0	1	0	0	0	0	0	0	0	1	0
1	0	0	0	35	1	140	40.5	438.6	882	2	0	1	0	0	0	0	0	1	0	0	0	0	1	0	3034
1	0	0	0	256	1	140	37.7	415.7	882	1	0	1	0	0	0	0	0	1	0	0	0	0	1	0	4059
0	1	0	0	115	2	120	46	614	918	1	0	1	0	0	0	1	0	0	0	0	0	0	0	1	1600
1	0	0	0	41	1	130	29	264.4	698	1	0	1	0	0	0	0	0	0	1	0	0	0	1	0	1900
0	0	1	0	227	1	120	39.5	372.5	735	1	0	1	0	0	0	0	0	1	0	0	0	0	1	0	2998
0	0	1	0	210	1	120	63.5	1075	1189	1	0	1	0	0	0	0	0	1	0	0	0	0	1	0	7880
0	0	1	0	102	1	130	58.2	813.6	1043	1	0	1	0	0	0	0	0	1	0	0	0	0	1	0	19092
0	0	1	0	97	1	120	64.8	970.2	1341	1	0	1	0	0	0	0	0	1	0	0	0	0	1	0	14515
0	1	0	0	89	1	120	47.1	538.7	1300	1	0	1	0	0	0	0	0	0	1	0	0	0	1	0	6310
0	0	1	0	77	1	140	52.8	491.4	1212	1	0	1	0	0	0	0	0	1	0	0	0	0	1	0	14050
1	0	0	0	129	1	120	39.1	320.4	771	1	0	1	0	0	0	0	0	0	1	0	0	0	1	0	4530
1	0	0	0	51	1	130	67	1493	1470	1	0	1	0	0	0	0	0	0	1	0	0	0	1	0	10920
0	0	1	0	59	1	130	38.8	310.3	882	1	0	1	0	0	0	0	0	1	0	0	0	0	1	0	6196
0	0	1	0	310	1	134	38.3	360	588	1	0	1	0	0	0	0	0	0	1	0	0	0	1	0	3410
1	0	0	0	26	1	130	42	376.9	588	1	0	1	0	0	0	0	0	0	1	0	0	0	1	0	6080
0	1	0	0	116	1	120	50	620.1	1164	1	0	1	0	0	0	0	0	1	0	0	0	0	1	0	3910
0	0	1	0	272	1	120	58.2	813.6	1043	1	0	1	0	0	0	0	0	1	0	0	0	0	1	0	7560
0	1	0	0	174	1	120	29	252.3	588	1	0	0	1	1	0	0	0	0	0	1	0	0	0	0	1600
1	0	0	0	168	1	120	50	620.1	1164	1	0	1	0	0	0	0	0	1	0	0	0	0	1	0	3770
1	0	0	0	119	2	130	53	669.3	1470	1	0	1	0	0	0	0	0	0	1	0	0	0	0	1	3167
0	1	0	0	228	1	130	64.6	811.5	1471	1	0	0	1	0	0	0	0	1	0	0	0	0	1	0	7000
0	0	1	0	154	2	120	46	666.5	1139	2	0	1	0	0	0	0	0	1	0	0	0	0	0	1	0
0	0	0	1	314	1	120	84.9	2382	2648	1	0	0	1	0	0	0	0	1	0	0	0	0	1	0	23900
0	0	1	1	98	1	130	53.6	924.3	919	1	0	0	1	0	0	0	0	1	0	0	0	0	1	0	1540
1	0	0	0	123	2	120	45	742.6	1176	1	0	1	0	0	0	0	0	0	1	0	0	0	0	1	3584
0	0	1	0	283	1	140	52.8	491.4	1212	1	0	1	0	0	0	0	0	1	0	0	0	0	1	0	2702
0	0	1	0	165	2	120	42	471	808	1	0	1	0	0	0	0	0	1	0	0	0	0	0	1	1146
0	1	0	0	70	1	130	64.8	996	1470	1	0	1	0	0	0	0	0	1	0	0	0	0	1	0	6002
1	0	0	0	96	2	130	46	664.9	1877	1	0	1	0	0	0	0	0	1	0	0	0	0	0	1	4710
0	0	1	0	107	1	130	58.2	813.6	1043	1	0	1	0	0	0	0	0	1	0	0	0	0	1	0	12177
1	0	0	0	97	1	120	39.1	320.4	771	1	0	1	0	0	0	0	0	0	1	0	0	0	1	0	3636
0	0	0	1	143	2	120	45	742.6	1176	3	0	1	0	0	0	0	0	0	1	0	0	0	0	1	0
0	0	1	0	89	1	120	43	358.1	588	1	0	1	0	0	0	0	0	0	1	0	0	0	1	0	7392
0	0	1	0	68	1	135	80.3	1598	2207	1	0	0	1	0	0	0	0	1	0	0	0	0	1	0	4650
0	1	0	0	143	2	125	43.1	494.5	845	1	0	1	0	0	0	0	1	0	0	0	0	0	0	1	2740
0	0	1	0	207	1	120	39.1	320.4	771	1	0	1	0	0	0	0	0	1	0	0	0	0	1	0	5484
0	1	0	0	38	1	130	29	264.4	698	1	0	1	0	0	0	0	0	0	1	0	0	0	1	0	2845
1	0	0	0	26	1	130	58.2	813.6	1043	1	0	1	0	0	0	0	0	0	1	0	0	0	1	0	2474
0	0	1	0	231	1	120	84.9	2382	2648	1	0	0	1	0	0	0	0	1	0	0	0	0	1	0	8300
0	0	1	0	79	1	120	42.7	338.9	588	1	0	1	0	0	0	0	0	1	0	0	0	0	1	0	5250
0	1	0	0	106	1	130	40.5	438.6	882	1	0	1	0	0	0	0	0	1	0	0	0	0	1	0	2170
0	1	0	0	128	1	120	39.1	320.4	771	1	0	1	0	0	0	0	0	0	1	0	0	0	1	0	3828
0	1	0	0	117	1	130	40.5	438.6	882	1	0	1	0	0	0	0	0	1	0	0	0	0	1	0	2930
0	1	0	0	41	2	130	46	664.9	1877	1	0	1	0	0	0	0	0	1	0	0	0	0	0	1	900
0	0	0	1	257	1	130	53.6	924.3	919	1	0	0	1	0	0	0	0	0	1	0	0	0	1	0	8600
0	0	0	1	284	1	120	84.9	2382	2648	4	0	0	1	0	0	0	0	1	0	0	0	0	1	0	0
1	0	0	0	139	2	120	45	742.6	1176	1	0	1	0	0	0	0	0	0	1	0	0	0	0	1	2248
0	1	0	0	109	1	120	50	620.1	1164	1	0	1	0	0	0	0	0	1	0	0	0	0	1	0	4074
0	1	0	0	95	1	130	65	1162	1433	1	0	1	0	0	0	0	0	1	0	0	0	0	1	0	2874
0	1	0	0	210	1	130	80.3	1513	2207	1	0	0	1	0	0	0	0	1	0	0	0	0	1	0	18900
1	0	0	0	168	1	120	29	252.3	588	2	0	0	1	1	0	0	0	0	0	1	0	0	0	0	200
1	0	0	0	22	1	130	67	1493	1470	1	0	1	0	0	0	0	0	0	1	0	0	0	1	0	18011
0	0	1	0	318	1	120	60	940.5	1471	1	0	0	1	0	0	0	0	1	0	0	0	0	1	0	600
0	0	1	0	111	1	120	47	465.9	1065	1	0	1	0	0	0	0	0	1	0	0	0	0	1	0	6000
0	0	1	0	117	1	130	38.8	310.3	882	1	0	1	0	0	0	0	0	1	0	0	0	0	1	0	6043
0	0	1	0	315	1	120	39.5	372.5	735	1	0	1	0	0	0	0	0	1	0	0	0	0	1	0	3484
0	1	0	0	119	2	120	46	614	918	5	0	1	0	0	0	1	0	0	0	0	0	0	0	1	0
0	1	0	0	116	1	120	43	358.1	588	1	0	1	0	0	0	0	0	0	1	0	0	0	1	0	3353
1	0	0	0	310	1	120	50	620.1	1164	1	0	1	0	0	0	0	0	1	0	0	0	0	1	0	2719
0	1	0	0	267	2	130	42	434.5	882	1	0	1	0	0	0	1	0	0	0	0	0	0	0	1	700
0	1	0	0	226	1	130	80.3	1513	2207	1	0	0	1	0	0	0	0	1	0	0	0	0	1	0	4280
1	0	0	0	93	2	120	45	742.6	1176	3	0	1	0	0	0	0	0	0	1	0	0	0	0	1	0
1	0	0	0	127	1	120	64.8	996	1470	1	0	1	0	0	0	0	0	1	0	0	0	0	1	0	5135
1	0	0	0	20	1	130	67	1493	1470	1	0	1	0	0	0	0	0	0	1	0	0	0	1	0	14686
0	0	1	0	140	2	120	46	666.5	1139	3	0	1	0	0	0	0	0	0	1	0	0	0	0	1	0
0	1	0	0	40	1	120	45	742.6	1176	1	0	1	0	0	0	0	0	1	0	0	0	0	1	0	4760
0	0	1	0	60	1	130	38.8	310.3	882	1	0	1	0	0	0	0	0	1	0	0	0	0	1	0	4547
0	1	0	0	41	1	120	47	465.9	1065	1	0	1	0	0	0	0	0	1	0	0	0	0	1	0	4130
1	0	0	0	304	1	120	50	620.1	1164	1	0	1	0	0	0	0	0	1	0	0	0	0	1	0	3752
0	0	1	1	57	1	120	84.9	2382	2648	1	0	0	1	0	0	0	0	1	0	0	0	0	1	0	12900
1	0	0	0	78	1	130	39.1	320.4	771	1	0	1	0	0	0	0	0	0	1	0	0	0	1	0	3600
1	0	0	0	97	1	120	43	358.1	588	1	0	1	0	0	0	0	0	0	1	0	0	0	1	0	4075
0	1	0	0	29	1	130	39.1	320.4	771	1	0	1	0	0	0	0	0	0	1	0	0	0	1	0	1854
0	1	0	0	88	1	125	63.5	1075	1189	1	0	1	0	0	0	0	0	0	1	0	0	0	1	0	5120
1	0	0	0	150	1	120	54.2	1258	1470	1	0	1	0	0	0	0	0	1	0	0	0	0	1	0	4752
0	0	1	0	253	1	120	42.7	338.9	588	1	0	1	0	0	0	0	0	0	1	0	0	0	1	0	3380
0	1	0	0	63	1	120	42.7	338.9	588	1	0	1	0	0	0	0	0	0	1	0	0	0	1	0	3419
0	0	1	0	176	1	120	29	264.4	698	1	0	1	0	0	0	0	0	1	0	0	0	0	1	0	4045
1	0	0	0	98	1	120	43	358.1	588	1	0	1	0	0	0	0	0	0	1	0	0	0	1	0	4326
1	0	0	0	122	1	120	37.2	388.2	588	1	0	1	0	0	0	0	0	0	1	0	0	0	1	0	4800
0	0	1	0	225	1	120	38.8	310.3	882	1	0	1	0	0	0	0	0	1	0	0	0	0	1	0	3345
1	0	0	0	76	1	120	47	465.9	1065	1	0	1	0	0	0	0	0	1	0	0	0	0	1	0	4850
1	0	0	0	148	1	120	54.2	1258	1470	1	0	1	0	0	0	0	0	1	0	0	0	0	1	0	6226
1	0	0	0	83	1	130	67	1493	1470	1	0	1	0	0	0	0	0	0	1	0	0	0	1	0	6643
0	1	0	0	309	1	110	29	252.3	588	2	0	0	1	1	0	0	0	0	0	0	1	0	0	0	1400
1	0	0	0	20	1	130	64.8	970.2	1341	1	0	1	0	0	0	0	0	0	1	0	0	0	1	0	16470
0	1	0	0	192	1	142	44.8	756	1103	1	1	0	0	0	0	0	0	1	0	0	0	0	1	0	2965
0	0	1	0	113	1	130	38.8	310.3	882	1	0	1	0	0	0	0	0	1	0	0	0	0	1	0	5814
0	0	1	0	268	1	120	39.5	372.5	735	1	0	1	0	0	0	0	0	1	0	0	0	0	1	0	5220
1	0	0	0	161	1	120	47	465.9	1065	1	0	1	0	0	0	0	0	1	0	0	0	0	1	0	4972
1	0	0	0	106	1	120	47	465.9	1065	1	0	1	0	0	0	0	0	1	0	0	0	0	1	0	5200
1	0	0	0	23	1	120	64.8	970.2	1341	1	0	1	0	0	0	0	0	1	0	0	0	0	1	0	10575
0	0	1	0	222	1	130	80.3	1513	2207	1	0	0	1	0	0	0	0	1	0	0	0	0	1	0	8460
1	0	0	0	97	1	120	47.1	538.7	1300	1	0	1	0	0	0	0	0	0	1	0	0	0	1	0	6930
0	0	0	1	268	1	130	64.6	811.5	1471	1	0	0	1	0	0	0	0	1	0	0	0	0	1	0	9510
0	0	1	0	280	1	120	38.3	360	588	1	0	1	0	0	0	0	0	1	0	0	0	0	1	0	3793
1	0	0	0	245	1	138	38.8	310.3	882	1	0	1	0	0	0	0	0	0	1	0	0	0	1	0	2025
1	0	0	0	98	1	125	63.5	1075	1189	1	0	1	0	0	0	0	0	0	1	0	0	0	1	0	5280
0	0	1	0	167	2	120	46	666.5	1139	1	0	1	0	0	0	0	0	1	0	0	0	0	0	1	1500
0	0	1	0	211	1	120	64.8	1106	1470	1	0	1	0	0	0	0	0	1	0	0	0	0	1	0	5417
0	0	1	0	78	1	120	42.7	338.9	588	1	0	1	0	0	0	0	0	1	0	0	0	0	1	0	2374
0	0	1	0	159	2	120	42	471	808	3	0	1	0	0	0	0	0	1	0	0	0	0	0	1	0
0	1	0	0	122	1	120	54.2	1258	1470	1	0	1	0	0	0	0	0	1	0	0	0	0	1	0	5335
0	1	0	0	92	1	125	63.5	1075	1189	1	0	1	0	0	0	0	0	0	1	0	0	0	1	0	5315
0	1	0	0	56	2	120	46	664.9	1877	2	0	1	0	0	0	0	0	1	0	0	0	0	0	1	0
0	0	1	0	235	1	120	58.2	813.6	1043	1	0	1	0	0	0	0	0	1	0	0	0	0	1	0	7600
0	0	1	0	218	1	130	64.8	970.2	1341	1	0	1	0	0	0	0	0	1	0	0	0	0	1	0	7520
0	0	1	0	92	1	120	64.8	970.2	1341	1	0	1	0	0	0	0	0	1	0	0	0	0	1	0	5490
1	0	0	0	124	1	120	43	358.1	588	1	0	1	0	0	0	0	0	0	1	0	0	0	1	0	3523
0	0	1	0	35	1	120	42.7	338.9	588	1	0	1	0	0	0	0	0	1	0	0	0	0	1	0	4943
0	0	1	0	274	1	130	80.3	1598	2207	1	0	0	1	0	0	0	0	1	0	0	0	0	1	0	12350
0	1	0	0	82	1	120	45	742.6	1176	1	0	1	0	0	0	0	0	1	0	0	0	0	1	0	758
0	0	0	1	154	2	120	46	664.7	1877	1	0	1	0	0	0	1	0	0	0	0	0	0	1	0	16105
0	1	0	0	58	1	130	39.1	320.4	771	1	0	1	0	0	0	0	0	0	1	0	0	0	1	0	3090
0	0	1	0	70	1	120	84.9	2382	2648	1	0	0	1	0	0	0	0	1	0	0	0	0	1	0	14000
0	0	1	0	172	2	120	46	666.5	1139	1	0	1	0	0	0	0	0	1	0	0	0	0	0	1	3000
0	1	0	0	289	1	130	64.6	811.5	1471	1	0	0	1	0	0	0	0	1	0	0	0	0	1	0	21380
1	0	0	0	12	1	120	64.8	970.2	1341	1	0	1	0	0	0	0	0	1	0	0	0	0	1	0	7460
0	1	0	0	201	1	130	42.7	338.9	588	1	0	1	0	0	0	0	0	1	0	0	0	0	1	0	1600
0	1	0	0	184	1	120	29	252.3	588	1	0	0	1	1	0	0	0	0	0	1	0	0	0	0	700
0	1	0	0	288	1	130	64.6	811.5	1471	1	0	0	1	0	0	0	0	1	0	0	0	0	1	0	18160
0	0	0	1	77	1	136	39.5	372.5	735	1	0	1	0	0	0	0	0	1	0	0	0	0	1	0	4263
0	0	1	0	258	1	132	64.8	970.2	1341	1	0	1	0	0	0	0	0	0	1	0	0	0	1	0	7910
0	0	1	0	116	1	120	39.1	320.4	771	1	0	1	0	0	0	0	0	0	1	0	0	0	1	0	4752
0	0	1	0	142	1	130	58.2	813.6	1043	1	0	1	0	0	0	0	0	1	0	0	0	0	1	0	8001
0	1	0	0	89	1	120	47	465.9	1065	1	0	1	0	0	0	0	0	1	0	0	0	0	1	0	5300
0	0	1	0	63	1	120	64.8	970.2	1341	1	0	1	0	0	0	0	0	1	0	0	0	0	1	0	1390
0	1	0	0	132	1	120	47	465.9	1065	1	0	1	0	0	0	0	0	1	0	0	0	0	1	0	6100
1	0	0	0	13	1	120	47	465.9	1065	1	0	1	0	0	0	0	0	1	0	0	0	0	1	0	6200
1	0	0	0	148	1	120	64.8	996	1470	1	0	1	0	0	0	0	0	1	0	0	0	0	1	0	5386
1	0	0	0	39	1	130	39.1	320.4	771	1	0	1	0	0	0	0	0	0	1	0	0	0	1	0	5306
0	0	1	0	263	1	130	80.3	1598	2207	2	0	0	1	0	0	0	0	1	0	0	0	0	1	0	0
0	1	0	0	128	2	125	43.1	494.5	845	2	0	1	0	0	0	0	1	0	0	0	0	0	0	1	8080
1	0	0	0	93	1	130	65	1162	1433	1	0	1	0	0	0	0	0	1	0	0	0	0	1	0	7461
0	1	0	0	264	1	135	60	993.4	1433	1	0	1	0	0	0	0	0	1	0	0	0	0	1	0	4769
0	1	0	0	150	1	140	60.3	896.7	883	1	0	0	1	1	0	0	0	0	0	1	0	0	0	0	1060
1	0	0	0	299	1	138	38.8	310.3	882	1	0	1	0	0	0	0	0	0	1	0	0	0	1	0	1600
1	0	0	0	112	1	120	47.1	538.7	1300	1	0	1	0	0	0	0	0	0	1	0	0	0	1	0	6700
1	0	0	0	337	1	120	50	620.1	1164	1	0	1	0	0	0	0	0	1	0	0	0	0	1	0	5050
0	0	1	1	76	1	120	84.9	2382	2648	1	0	0	1	0	0	0	0	1	0	0	0	0	1	0	15100
0	1	0	0	163	1	140	60.3	896.7	883	1	0	0	1	1	0	0	0	0	0	1	0	0	0	0	3325
1	0	0	0	34	1	120	37.2	388.2	588	1	0	1	0	0	0	0	0	0	1	0	0	0	1	0	5860
1	0	0	0	58	1	120	65	1162	1433	1	0	1	0	0	0	0	0	1	0	0	0	0	1	0	7000
0	1	0	0	88	1	120	50	620.1	1164	1	0	1	0	0	0	0	0	1	0	0	0	0	1	0	2852
0	0	1	1	203	1	130	80.3	1598	2207	1	0	0	1	0	0	0	0	1	0	0	0	0	1	0	10200
1	0	0	0	67	1	120	54.2	1258	1470	1	0	1	0	0	0	0	0	1	0	0	0	0	1	0	1947
0	0	1	0	296	1	120	84.9	2382	2648	1	0	0	1	0	0	0	0	1	0	0	0	0	1	0	2800
1	0	0	0	103	1	120	54.2	1258	1470	1	0	1	0	0	0	0	0	1	0	0	0	0	1	0	8822
0	0	1	0	263	1	120	38.3	360	588	1	0	1	0	0	0	0	0	1	0	0	0	0	1	0	7601
1	0	0	0	53	1	120	50	620.1	1164	1	0	1	0	0	0	0	0	1	0	0	0	0	1	0	10400
1	0	0	0	34	1	130	29	264.4	698	1	0	1	0	0	0	0	0	0	1	0	0	0	1	0	3020
0	1	0	0	22	2	125	46	664.9	1877	1	0	1	0	0	0	0	0	1	0	0	0	0	0	1	17100
0	0	1	0	174	1	125	56.6	705.6	1300	1	0	1	0	0	0	0	0	1	0	0	0	0	1	0	5730
0	0	1	0	186	1	125	56.6	705.6	1300	1	0	1	0	0	0	0	0	1	0	0	0	0	1	0	5972
0	0	1	0	141	2	120	46	666.5	1139	3	0	1	0	0	0	0	0	0	1	0	0	0	0	1	2000
0	0	1	0	89	1	120	29	264.4	698	1	0	1	0	0	0	0	0	1	0	0	0	0	1	0	7865
0	1	0	0	61	2	120	46	664.9	1877	1	0	1	0	0	0	0	0	1	0	0	0	0	0	1	2745
1	0	0	0	77	1	130	39.1	320.4	771	1	0	1	0	0	0	0	0	0	1	0	0	0	1	0	4050
1	0	0	0	271	1	140	37.7	415.7	882	1	0	1	0	0	0	0	0	1	0	0	0	0	1	0	5040
0	0	1	0	128	1	130	58.2	813.6	1043	1	0	1	0	0	0	0	0	1	0	0	0	0	1	0	8699
1	0	0	0	94	1	120	64.8	970.2	1341	1	0	1	0	0	0	0	0	1	0	0	0	0	1	0	2735
1	0	0	0	34	1	130	39.1	320.4	771	1	0	1	0	0	0	0	0	0	1	0	0	0	1	0	3020
1	0	0	0	137	2	130	46	664.9	1877	1	0	1	0	0	0	0	0	0	1	0	0	0	0	1	2535
1	0	0	0	23	1	130	64.8	970.2	1341	1	0	1	0	0	0	0	0	0	1	0	0	0	1	0	6610
0	0	1	0	241	1	120	42.7	338.9	588	1	0	1	0	0	0	0	0	0	1	0	0	0	1	0	5144
1	0	0	0	116	1	120	64.8	970.2	1341	1	0	1	0	0	0	0	0	0	1	0	0	0	1	0	4230
1	0	0	0	38	1	120	37.2	388.2	588	1	0	1	0	0	0	0	0	0	1	0	0	0	1	0	6095
1	0	0	0	129	1	120	64.8	996	1470	1	0	1	0	0	0	0	0	1	0	0	0	0	1	0	6560
0	0	1	0	222	1	130	33	299.1	1037	1	0	1	0	0	0	0	0	1	0	0	0	0	1	0	2212
0	0	1	0	203	1	125	56.6	705.6	1300	1	0	1	0	0	0	0	0	1	0	0	0	0	1	0	7442
1	0	0	0	135	1	120	50	620.1	1164	1	0	1	0	0	0	0	0	1	0	0	0	0	1	0	4510
0	0	1	0	139	1	130	58.2	813.6	1043	1	0	1	0	0	0	0	0	1	0	0	0	0	1	0	8551
0	0	1	0	69	1	130	65	1162	1433	1	0	1	0	0	0	0	0	1	0	0	0	0	1	0	7389
1	0	0	0	40	1	130	42	376.9	588	1	0	1	0	0	0	0	0	0	1	0	0	0	1	0	5020
0	0	1	0	84	1	120	45	742.6	1176	1	0	1	0	0	0	0	0	1	0	0	0	0	1	0	90600
1	0	0	0	6	1	130	64.8	996	1470	1	0	1	0	0	0	0	0	1	0	0	0	0	1	0	3723
0	1	0	0	22	2	130	46	664.9	1877	1	0	1	0	0	0	0	0	1	0	0	0	0	0	1	22260
1	0	0	0	92	2	120	45	742.6	1176	3	0	1	0	0	0	0	0	0	1	0	0	0	0	1	0
1	0	0	0	122	1	120	43	358.1	588	1	0	1	0	0	0	0	0	0	1	0	0	0	1	0	4623
1	0	0	0	344	1	120	47	465.9	1065	1	0	1	0	0	0	0	0	1	0	0	0	0	1	0	3110
1	0	0	0	261	1	130	50	620.1	1164	2	0	1	0	0	0	0	0	0	1	0	0	0	1	0	3062
0	0	1	0	225	1	130	64.6	811.5	1471	1	0	0	1	0	0	0	0	1	0	0	0	0	1	0	430
0	0	1	0	149	1	120	64.8	970.2	1341	1	0	1	0	0	0	0	0	0	1	0	0	0	1	0	4150
0	0	1	0	185	1	120	38.3	360	588	1	0	1	0	0	0	0	0	1	0	0	0	0	1	0	811
0	0	1	0	112	1	120	39.5	372.5	735	1	0	1	0	0	0	0	0	1	0	0	0	0	1	0	6743
0	1	0	0	65	1	130	45	742.6	1176	1	0	1	0	0	0	0	0	1	0	0	0	0	1	0	7240
0	1	0	0	74	1	120	45	742.6	1176	1	0	1	0	0	0	0	0	1	0	0	0	0	1	0	744
1	0	0	0	39	1	120	65	1162	1433	1	0	1	0	0	0	0	0	1	0	0	0	0	1	0	9726
1	0	0	0	164	1	125	56.6	705.6	1300	1	0	1	0	0	0	0	0	1	0	0	0	0	1	0	5145
0	1	0	0	226	1	130	80.3	1598	2207	1	0	0	1	0	0	0	0	1	0	0	0	0	1	0	12800
1	0	0	0	102	1	120	43	358.1	588	1	0	1	0	0	0	0	0	0	1	0	0	0	1	0	2714
1	0	0	0	140	2	120	46	664.7	1877	1	0	1	0	0	0	1	0	0	0	0	0	0	1	0	4641
0	1	0	0	88	2	120	46	664.9	1877	1	0	1	0	0	0	0	0	1	0	0	0	0	0	1	1250
0	1	0	0	171	1	140	61.2	916.3	478	1	0	0	1	1	0	0	0	0	0	1	0	0	0	0	1240
0	0	1	0	261	1	130	65	1162	1433	1	0	1	0	0	0	0	0	1	0	0	0	0	1	0	9735
0	0	1	0	174	2	120	46	666.5	1139	1	0	1	0	0	0	0	0	1	0	0	0	0	0	1	3000
0	0	1	0	108	1	135	80.3	1598	2207	1	0	0	1	0	0	0	0	1	0	0	0	0	1	0	8300
0	0	1	0	201	1	120	63.5	1075	1189	1	0	1	0	0	0	0	0	1	0	0	0	0	1	0	5616
1	0	0	0	34	1	136	39.5	372.5	735	1	0	1	0	0	0	0	0	1	0	0	0	0	1	0	2243
1	0	0	0	25	1	125	63.5	1075	1189	1	0	1	0	0	0	0	0	0	1	0	0	0	1	0	8200
0	1	0	0	67	1	130	64.8	996	1470	1	0	1	0	0	0	0	0	1	0	0	0	0	1	0	6158
1	0	0	0	48	1	120	42.7	338.9	588	1	0	1	0	0	0	0	0	0	1	0	0	0	1	0	4803
0	1	0	0	337	1	120	60	940.5	1471	1	0	0	1	0	0	0	0	1	0	0	0	0	1	0	10360
0	1	0	0	81	1	140	60.3	896.7	883	1	0	0	1	1	0	0	0	0	0	1	0	0	0	0	2700
1	0	0	0	82	1	130	65	1162	1433	1	0	1	0	0	0	0	0	1	0	0	0	0	1	0	9243
1	0	0	0	74	1	120	38.3	360	588	1	0	1	0	0	0	0	0	1	0	0	0	0	1	0	2450
0	0	1	0	294	1	138	38.8	310.3	882	2	0	1	0	0	0	0	0	0	1	0	0	0	1	0	0
1	0	0	0	5	1	120	64.8	970.2	1341	1	0	1	0	0	0	0	0	1	0	0	0	0	1	0	9190
0	1	0	0	104	1	140	61.2	916.3	478	1	0	0	1	1	0	0	0	0	0	0	1	0	0	0	4280
1	0	0	0	32	1	130	39.1	320.4	771	1	0	1	0	0	0	0	0	0	1	0	0	0	1	0	2598
0	0	1	0	160	1	120	38.3	360	588	1	0	1	0	0	0	0	0	1	0	0	0	0	1	0	10610
0	0	1	0	209	1	120	38.3	360	588	1	0	1	0	0	0	0	0	1	0	0	0	0	1	0	4618
0	1	0	0	206	1	130	80.3	1513	2207	1	0	0	1	0	0	0	0	1	0	0	0	0	1	0	16350
0	0	1	0	279	1	130	65	1162	1433	1	0	1	0	0	0	0	0	1	0	0	0	0	1	0	6972
0	0	1	0	71	1	135	80.3	1598	2207	1	0	0	1	0	0	0	0	1	0	0	0	0	1	0	9900
1	0	0	0	108	1	120	37.2	388.2	588	1	0	1	0	0	0	0	0	0	1	0	0	0	1	0	4900
1	0	0	0	127	1	120	38.3	360	588	1	0	1	0	0	0	0	0	1	0	0	0	0	1	0	2388
0	0	1	0	27	1	120	42.7	338.9	588	1	0	1	0	0	0	0	0	1	0	0	0	0	1	0	787
0	0	1	0	224	1	130	80.3	1513	2207	1	0	0	1	0	0	0	0	1	0	0	0	0	1	0	5775
0	1	0	0	75	1	140	60.3	896.7	883	1	0	0	1	1	0	0	0	0	0	1	0	0	0	0	1055
0	0	0	1	80	1	130	53.6	924.3	919	1	0	0	1	0	0	0	0	1	0	0	0	0	1	0	13930
0	0	1	0	180	1	130	80.3	1598	2207	1	0	0	1	0	0	0	0	1	0	0	0	0	1	0	2800
0	1	0	0	79	2	132	53	669.3	1470	1	0	1	0	0	0	0	0	0	1	0	0	0	0	1	11734
0	0	1	0	74	1	130	65	1162	1433	1	0	1	0	0	0	0	0	1	0	0	0	0	1	0	1662
0	1	0	0	355	1	120	47	465.9	1065	1	0	1	0	0	0	0	0	1	0	0	0	0	1	0	4970
0	0	1	0	86	1	120	42.7	338.9	588	1	0	1	0	0	0	0	0	1	0	0	0	0	1	0	3844
1	0	0	0	146	1	120	64.8	996	1470	1	0	1	0	0	0	0	0	1	0	0	0	0	1	0	4980
0	1	0	0	136	2	125	43.1	494.5	845	1	0	1	0	0	0	0	1	0	0	0	0	0	0	1	4280
0	0	1	0	54	1	130	80.3	1598	2207	1	0	0	1	0	0	0	0	1	0	0	0	0	1	0	950
0	0	1	0	218	1	130	65	1162	1433	1	0	1	0	0	0	0	0	1	0	0	0	0	1	0	11436
1	0	0	0	93	2	130	46	664.9	1877	1	0	1	0	0	0	0	0	1	0	0	0	0	0	1	180
1	0	0	0	15	1	130	64.8	996	1470	1	0	1	0	0	0	0	0	1	0	0	0	0	1	0	6566
0	0	1	0	50	1	136	39.5	372.5	735	1	0	1	0	0	0	0	0	1	0	0	0	0	1	0	2242
0	0	1	0	205	1	140	37.7	415.7	882	1	0	1	0	0	0	0	0	1	0	0	0	0	1	0	5174
0	1	0	0	69	2	130	46	664.9	1877	1	0	1	0	0	0	0	0	1	0	0	0	0	0	1	2400
0	1	0	0	237	1	130	80.3	1598	2207	1	0	0	1	0	0	0	0	1	0	0	0	0	1	0	6200
1	0	0	0	291	1	138	38.8	310.3	882	1	0	1	0	0	0	0	0	0	1	0	0	0	1	0	2850
0	0	1	0	169	2	120	46	666.5	1139	2	0	1	0	0	0	0	0	1	0	0	0	0	0	1	300
0	1	0	0	118	1	130	40.5	438.6	882	1	0	1	0	0	0	0	0	1	0	0	0	0	1	0	2480
0	0	0	1	133	1	130	71.1	1256	699	1	0	0	1	1	0	0	0	0	0	0	1	0	0	0	1500
0	1	0	0	127	1	140	60.3	896.7	883	1	0	0	1	1	0	0	0	0	0	1	0	0	0	0	750
0	1	0	0	130	2	125	43.1	494.5	845	1	0	1	0	0	0	0	1	0	0	0	0	0	0	1	400
1	0	0	0	138	1	120	64.8	996	1470	1	0	1	0	0	0	0	0	1	0	0	0	0	1	0	4030
0	0	1	0	143	1	120	39.1	320.4	771	1	0	1	0	0	0	0	0	0	1	0	0	0	1	0	10842
1	0	0	0	165	1	120	64.8	996	1470	1	0	1	0	0	0	0	0	1	0	0	0	0	1	0	3400
0	1	0	0	175	1	140	60.3	896.7	883	1	0	0	1	1	0	0	0	0	0	1	0	0	0	0	6175
1	0	0	0	288	1	140	37.7	415.7	882	1	0	1	0	0	0	0	0	1	0	0	0	0	1	0	2891
1	0	0	0	123	2	120	46	664.7	1877	1	0	1	0	0	0	1	0	0	0	0	0	0	1	0	1150
0	0	1	0	295	1	120	84.9	2382	2648	2	0	0	1	0	0	0	0	1	0	0	0	0	1	0	3800
0	0	1	0	233	1	132	64.8	970.2	1341	1	0	1	0	0	0	0	0	0	1	0	0	0	1	0	9000
0	0	1	0	245	1	120	64.8	1106	1470	1	0	1	0	0	0	0	0	1	0	0	0	0	1	0	4626
0	1	0	0	29	2	125	46	664.9	1877	2	0	1	0	0	0	0	0	1	0	0	0	0	0	1	3100
1	0	0	0	343	1	120	47	465.9	1065	1	0	1	0	0	0	0	0	1	0	0	0	0	1	0	3100
0	1	0	0	279	1	140	61.2	916.3	478	1	0	0	1	1	0	0	0	0	0	1	0	0	0	0	820
0	1	0	0	184	1	142	44.8	756	1103	1	1	0	0	0	0	0	0	1	0	0	0	0	1	0	2830
0	0	1	0	239	1	120	39.1	320.4	771	1	0	1	0	0	0	0	0	1	0	0	0	0	1	0	4020
1	0	0	0	35	1	130	60	993.4	1433	1	0	1	0	0	0	0	0	0	1	0	0	0	1	0	4849
1	0	0	0	105	1	120	47	465.9	1065	1	0	1	0	0	0	0	0	1	0	0	0	0	1	0	5100
0	0	1	1	58	1	136	39.5	372.5	735	1	0	1	0	0	0	0	0	1	0	0	0	0	1	0	2230
0	1	0	0	117	2	120	45	742.6	1176	1	0	1	0	0	0	0	0	0	1	0	0	0	0	1	3444
0	0	1	0	73	1	130	42	376.9	588	1	0	1	0	0	0	0	0	1	0	0	0	0	1	0	3270
0	1	0	0	185	1	120	45	539.6	882	1	0	1	0	0	0	0	0	1	0	0	0	0	1	0	16267
0	0	1	0	259	1	120	84.9	2382	2648	1	0	0	1	0	0	0	0	1	0	0	0	0	1	0	2300
0	0	1	0	147	1	120	37.2	388.2	588	1	0	1	0	0	0	0	0	0	1	0	0	0	1	0	12395
0	1	0	0	125	1	135	42	471	808	1	0	1	0	0	0	0	1	0	0	0	0	0	0	1	255
0	1	0	0	231	1	130	80.3	1598	2207	1	0	0	1	0	0	0	0	1	0	0	0	0	1	0	11450
0	1	0	0	57	1	130	39.1	320.4	771	1	0	1	0	0	0	0	0	0	1	0	0	0	1	0	2424
0	1	0	0	265	1	135	60	993.4	1433	1	0	1	0	0	0	0	0	1	0	0	0	0	1	0	3466
0	1	0	0	187	1	140	61.2	916.3	478	1	0	0	1	1	0	0	0	0	0	1	0	0	0	0	890
0	0	1	0	296	1	120	60	940.5	1471	7	0	0	1	0	0	0	0	1	0	0	0	0	1	0	0
0	1	0	0	213	1	130	53.6	924.3	919	3	0	0	1	0	0	0	0	0	1	0	0	0	1	0	4800
0	0	0	1	148	2	120	46	664.7	1877	1	0	1	0	0	0	1	0	0	0	0	0	0	1	0	13828
1	0	0	0	111	1	120	37.2	388.2	588	1	0	1	0	0	0	0	0	0	1	0	0	0	1	0	3200
0	1	0	0	234	1	130	53.6	924.3	919	1	0	0	1	0	0	0	0	0	1	0	0	0	1	0	6500
0	1	0	0	114	1	120	50	620.1	1164	1	0	1	0	0	0	0	0	1	0	0	0	0	1	0	7414
0	0	1	0	79	1	130	42	376.9	588	1	0	1	0	0	0	0	0	1	0	0	0	0	1	0	7590
0	0	1	0	237	1	120	84.9	2382	2648	1	0	0	1	0	0	0	0	1	0	0	0	0	1	0	10400
1	1	0	0	74	1	120	47	465.9	1065	1	0	1	0	0	0	0	0	1	0	0	0	0	1	0	1250
0	0	1	0	209	1	130	64.8	970.2	1341	1	0	1	0	0	0	0	0	1	0	0	0	0	1	0	9000
1	0	0	0	98	1	125	56.6	705.6	1300	1	0	1	0	0	0	0	0	0	1	0	0	0	1	0	7384
0	0	1	0	269	1	120	39.5	372.5	735	1	0	1	0	0	0	0	0	1	0	0	0	0	1	0	7336
0	0	1	0	157	2	120	46	666.5	1139	1	0	1	0	0	0	0	0	1	0	0	0	0	0	1	1000
0	0	1	0	210	1	120	84.9	2382	2648	1	0	0	1	0	0	0	0	1	0	0	0	0	1	0	7900
1	0	0	0	33	1	130	60	993.4	1433	1	0	1	0	0	0	0	0	0	1	0	0	0	1	0	4550
0	1	0	0	169	1	140	61.2	916.3	478	3	0	0	1	1	0	0	0	0	0	1	0	0	0	0	0
0	1	0	0	3	1	130	60	993.4	1433	1	0	1	0	0	0	0	0	0	1	0	0	0	1	0	9054
0	0	1	0	214	1	130	64.8	970.2	1341	1	0	1	0	0	0	0	0	1	0	0	0	0	1	0	6320
0	1	0	0	53	2	120	46	664.9	1877	2	0	1	0	0	0	0	0	1	0	0	0	0	0	1	0
0	0	1	0	140	2	120	46	666.5	1139	2	0	1	0	0	0	0	0	1	0	0	0	0	0	1	1000
0	0	1	0	152	1	120	29	264.4	698	1	0	1	0	0	0	0	0	1	0	0	0	0	1	0	6412
1	0	0	0	135	1	135	80.3	1598	2207	1	0	0	1	0	0	0	0	1	0	0	0	0	1	0	7500
0	1	0	0	76	2	120	46	664.9	1877	1	0	1	0	0	0	0	0	1	0	0	0	0	0	1	100
0	0	1	0	254	1	120	60	940.5	1471	1	0	0	1	0	0	0	0	1	0	0	0	0	1	0	1600
0	1	0	0	24	1	120	47	465.9	1065	1	0	1	0	0	0	0	0	1	0	0	0	0	1	0	4100
0	1	0	0	96	1	120	50	620.1	1164	1	0	1	0	0	0	0	0	1	0	0	0	0	1	0	1944
0	0	1	0	182	1	120	42	376.9	588	1	0	1	0	0	1	0	0	0	0	0	0	0	1	0	5456
0	1	0	0	299	1	140	61.2	916.3	478	1	0	0	1	1	0	0	0	0	0	1	0	0	0	0	1955
0	1	0	0	137	2	120	46	666.5	1139	4	0	1	0	0	0	0	0	0	1	0	0	0	0	1	0
0	0	1	0	158	2	120	43.1	494.5	845	1	0	1	0	0	0	0	0	1	0	0	0	0	0	1	7096
1	0	0	0	86	1	125	63.5	1075	1189	1	0	1	0	0	0	0	0	0	1	0	0	0	1	0	6560
0	1	0	0	116	2	150	46	664.9	1877	1	0	1	0	0	0	0	0	0	1	0	0	0	0	1	3859
0	1	0	0	296	1	130	80.3	1513	2207	1	0	0	1	0	0	0	0	1	0	0	0	0	1	0	9035
0	1	0	0	141	1	140	61.2	916.3	478	2	0	0	1	1	0	0	0	0	0	1	0	0	0	0	0
0	1	0	0	60	2	129	53	929.4	1470	2	0	1	0	0	0	0	0	0	1	0	0	0	0	1	0
1	0	0	0	188	1	130	37.7	415.7	882	1	0	1	0	0	0	0	0	1	0	0	0	0	1	0	881
0	0	1	0	93	1	135	80.3	1598	2207	1	0	0	1	0	0	0	0	1	0	0	0	0	1	0	12600
0	0	1	0	286	1	134	29	264.4	698	1	0	1	0	0	0	0	0	0	1	0	0	0	1	0	4283
0	1	0	0	78	2	129	53	929.4	1470	1	0	1	0	0	0	0	0	0	1	0	0	0	0	1	17284
0	0	1	0	266	1	120	67.2	1089	1078	1	0	1	0	0	0	0	0	0	1	0	0	0	1	0	7059
1	0	0	0	134	1	120	54.2	1258	1470	1	0	1	0	0	0	0	0	1	0	0	0	0	1	0	8657
1	0	0	0	282	1	120	50	620.1	1164	1	0	1	0	0	0	0	0	1	0	0	0	0	1	0	3294
0	0	1	0	210	1	130	64.8	970.2	1341	1	0	1	0	0	0	0	0	1	0	0	0	0	1	0	8770
1	0	0	0	71	1	130	42	376.9	588	1	0	1	0	0	0	0	0	0	1	0	0	0	1	0	5220
0	0	1	0	34	1	120	42.7	338.9	588	1	0	1	0	0	0	0	0	1	0	0	0	0	1	0	4979
0	0	1	0	86	1	120	45	742.6	1176	1	0	1	0	0	0	0	0	1	0	0	0	0	1	0	30000
0	0	1	0	167	2	120	46	614	918	6	0	1	0	0	0	0	0	1	0	0	0	0	0	1	0
1	0	0	0	78	1	120	29	264.4	698	1	0	1	0	0	0	0	0	1	0	0	0	0	1	0	2302
1	0	0	0	303	1	138	38.8	310.3	882	1	0	1	0	0	0	0	0	0	1	0	0	0	1	0	2125
0	0	1	0	187	1	120	38.3	360	588	1	0	1	0	0	0	0	0	1	0	0	0	0	1	0	1573
0	0	1	0	239	1	130	65	1162	1433	1	0	1	0	0	0	0	0	1	0	0	0	0	1	0	8093
0	1	0	0	163	2	120	46	664.7	1877	1	0	1	0	0	0	1	0	0	0	0	0	0	1	0	5900
0	1	0	0	43	2	125	46	664.9	1877	1	0	1	0	0	0	0	0	1	0	0	0	0	0	1	10000
1	0	0	0	153	1	120	47	465.9	1065	1	0	1	0	0	0	0	0	0	1	0	0	0	1	0	1526
0	0	1	0	310	1	140	52.8	491.4	1212	1	0	1	0	0	0	0	0	1	0	0	0	0	1	0	5508
0	0	1	0	136	1	120	38.3	360	588	1	0	1	0	0	0	0	0	1	0	0	0	0	1	0	7568
1	0	0	0	273	1	140	37.7	415.7	882	1	0	1	0	0	0	0	0	1	0	0	0	0	1	0	4755
0	0	1	0	156	1	120	29	264.4	698	1	0	1	0	0	0	0	0	1	0	0	0	0	1	0	2445
0	0	1	0	75	1	135	80.3	1598	2207	1	0	0	1	0	0	0	0	1	0	0	0	0	1	0	8650
1	0	0	0	168	1	120	54.2	1258	1470	1	0	1	0	0	0	0	0	1	0	0	0	0	1	0	5390
0	0	1	0	264	1	120	58.2	813.6	1043	1	0	1	0	0	0	0	0	1	0	0	0	0	1	0	13284
0	0	1	0	158	2	120	42	471	808	1	0	1	0	0	0	0	0	1	0	0	0	0	0	1	2916
0	1	0	0	275	1	140	61.2	916.3	478	1	0	0	1	1	0	0	0	0	0	1	0	0	0	0	140
0	0	1	0	210	1	120	39.1	320.4	771	1	0	1	0	0	0	0	0	1	0	0	0	0	1	0	4176
1	0	0	0	159	1	120	43	358.1	588	1	0	1	0	0	0	0	0	1	0	0	0	0	1	0	2839
1	0	0	0	41	1	120	65	1162	1433	1	0	1	0	0	0	0	0	1	0	0	0	0	1	0	13299
0	0	1	0	120	1	130	38.8	310.3	882	1	0	1	0	0	0	0	0	1	0	0	0	0	1	0	5763
0	1	0	0	193	1	120	45	539.6	882	1	0	1	0	0	0	0	0	1	0	0	0	0	1	0	7134
1	0	0	0	58	1	120	37.2	388.2	588	1	0	1	0	0	0	0	0	0	1	0	0	0	1	0	3470
1	0	0	0	98	1	120	64.8	996	1470	1	0	1	0	0	0	0	0	1	0	0	0	0	1	0	10745
0	1	0	0	300	1	135	60	993.4	1433	1	0	1	0	0	0	0	0	1	0	0	0	0	1	0	2475
1	0	0	0	134	1	120	47.1	538.7	1300	1	0	1	0	0	0	0	0	0	1	0	0	0	1	0	8100
0	0	1	0	72	1	135	80.3	1598	2207	1	0	0	1	0	0	0	0	1	0	0	0	0	1	0	8200
0	0	1	0	193	1	120	60	940.5	1471	1	0	0	1	0	0	0	0	1	0	0	0	0	1	0	7800
0	1	0	0	244	1	120	84.9	2382	2648	1	0	0	1	0	0	0	0	1	0	0	0	0	1	0	5800
0	0	0	1	134	1	130	71.1	1256	699	1	0	0	1	1	0	0	0	0	0	0	1	0	0	0	1370
1	0	0	0	147	1	120	47	465.9	1065	1	0	1	0	0	0	0	0	0	1	0	0	0	1	0	3117
1	0	0	0	38	1	130	67	1493	1470	1	0	1	0	0	0	0	0	0	1	0	0	0	1	0	9634
0	1	0	0	29	1	130	64.8	996	1470	1	0	1	0	0	0	0	0	1	0	0	0	0	1	0	4108
0	0	1	0	39	1	120	42.7	338.9	588	1	0	1	0	0	0	0	0	1	0	0	0	0	1	0	4318
1	0	0	0	191	1	120	47	465.9	1065	1	0	1	0	0	0	0	0	1	0	0	0	0	1	0	3966
0	1	0	0	111	1	120	50	620.1	1164	1	0	1	0	0	0	0	0	1	0	0	0	0	1	0	4461
0	0	1	0	237	1	120	60	940.5	1471	1	0	0	1	0	0	0	0	1	0	0	0	0	1	0	11430
0	1	0	0	80	1	130	45	742.6	1176	1	0	1	0	0	0	0	0	1	0	0	0	0	1	0	6730
0	1	0	0	175	1	120	29	252.3	588	1	0	0	1	1	0	0	0	0	0	1	0	0	0	0	2300
1	0	0	0	205	1	120	47	465.9	1065	1	0	1	0	0	0	0	0	1	0	0	0	0	1	0	3775
1	0	0	0	129	1	120	64.8	970.2	1341	1	0	1	0	0	0	0	0	0	1	0	0	0	1	0	3330
1	0	0	0	74	1	130	64.8	996	1470	1	0	1	0	0	0	0	0	1	0	0	0	0	1	0	2640
0	1	0	0	77	1	120	47.1	538.7	1300	1	0	1	0	0	0	0	0	0	1	0	0	0	1	0	2990
0	0	0	1	128	1	130	71.1	1256	699	2	0	0	1	1	0	0	0	0	0	0	1	0	0	0	0
0	0	1	0	274	1	140	52.8	491.4	1212	1	0	1	0	0	0	0	0	1	0	0	0	0	1	0	4890
1	0	0	0	95	1	130	64.8	996	1470	1	0	1	0	0	0	0	0	1	0	0	0	0	1	0	5617
1	0	0	0	160	1	120	42	376.9	588	1	0	1	0	0	1	0	0	0	0	0	0	0	1	0	3464
1	0	0	0	311	1	138	38.8	310.3	882	1	0	1	0	0	0	0	0	0	1	0	0	0	1	0	2325
0	1	1	0	65	1	130	84.9	2382	2648	1	0	0	1	0	0	0	0	0	1	0	0	0	1	0	7300
0	0	1	0	60	1	130	84.9	2382	2648	1	0	0	1	0	0	0	0	0	1	0	0	0	1	0	19900
0	0	1	0	99	1	130	42	376.9	588	1	0	1	0	0	0	0	0	1	0	0	0	0	1	0	5940
0	1	0	0	294	1	130	64.6	811.5	1471	1	0	0	1	0	0	0	0	1	0	0	0	0	1	0	22380
0	0	1	0	145	1	120	39.1	320.4	771	1	0	1	0	0	0	0	0	0	1	0	0	0	1	0	11022
0	0	1	0	249	1	120	58.2	813.6	1043	3	0	1	0	0	0	0	0	1	0	0	0	0	1	0	0
0	0	1	0	166	1	120	29	264.4	698	1	0	1	0	0	0	0	0	1	0	0	0	0	1	0	4492
0	1	0	0	172	2	120	46	664.9	1877	1	0	1	0	0	0	0	0	1	0	0	0	0	0	1	867
1	0	0	0	119	1	120	43	358.1	588	1	0	1	0	0	0	0	0	0	1	0	0	0	1	0	4145
0	1	0	0	52	2	132	53	669.3	1470	1	0	1	0	0	0	0	0	0	1	0	0	0	0	1	610
1	0	0	0	138	2	150	46	664.9	1877	1	0	1	0	0	0	0	0	0	1	0	0	0	0	1	2878
0	1	0	0	106	1	140	61.2	916.3	478	1	0	0	1	1	0	0	0	0	0	0	1	0	0	0	1050
0	1	0	0	83	2	129	53	929.4	1470	1	0	1	0	0	0	0	0	0	1	0	0	0	0	1	11120
0	0	1	0	277	1	130	65	1162	1433	1	0	1	0	0	0	0	0	1	0	0	0	0	1	0	6490
1	0	0	0	53	1	130	64.8	970.2	1341	1	0	1	0	0	0	0	0	0	1	0	0	0	1	0	21770
1	0	0	0	239	1	140	37.7	415.7	882	1	0	1	0	0	0	0	0	1	0	0	0	0	1	0	4633
0	0	1	0	207	1	120	63.5	1075	1189	1	0	1	0	0	0	0	0	1	0	0	0	0	1	0	5960
0	1	0	0	91	2	120	46	664.9	1877	1	0	1	0	0	0	0	0	1	0	0	0	0	0	1	4645
0	0	0	1	335	1	138	53.6	924.3	919	1	0	0	1	0	0	0	0	0	1	0	0	0	1	0	18450
0	1	0	0	137	2	125	43.1	494.5	845	1	0	1	0	0	0	0	1	0	0	0	0	0	0	1	7300
1	0	0	0	64	1	130	39.1	320.4	771	1	0	1	0	0	0	0	0	0	1	0	0	0	1	0	3324
0	1	0	0	64	1	130	64.8	996	1470	1	0	1	0	0	0	0	0	1	0	0	0	0	1	0	3272
1	0	0	0	54	1	120	65	1162	1433	1	0	1	0	0	0	0	0	1	0	0	0	0	1	0	6892
1	0	0	0	73	1	120	38.3	360	588	1	0	1	0	0	0	0	0	1	0	0	0	0	1	0	1342
1	0	0	0	132	1	135	80.3	1598	2207	1	0	0	1	0	0	0	0	1	0	0	0	0	1	0	6300
1	0	0	0	131	1	130	40.5	438.6	882	1	0	1	0	0	0	0	0	1	0	0	0	0	1	0	2810
1	0	0	0	282	1	140	37.7	415.7	882	1	0	1	0	0	0	0	0	1	0	0	0	0	1	0	3513
0	1	0	0	132	1	125	56.6	705.6	1300	1	0	1	0	0	0	0	0	0	1	0	0	0	1	0	6080
0	1	0	0	185	2	120	46	664.9	1877	1	0	1	0	0	0	0	0	1	0	0	0	0	0	1	3106
1	0	0	0	27	1	130	64.8	1106	1470	1	0	1	0	0	0	0	0	0	1	0	0	0	1	0	2175
0	1	0	0	263	1	130	80.3	1513	2207	1	0	0	1	0	0	0	0	1	0	0	0	0	1	0	7470
1	0	0	0	217	1	120	45	539.6	882	1	0	1	0	0	0	0	0	1	0	0	0	0	1	0	3559
0	0	1	0	164	1	120	43	358.1	588	1	0	1	0	0	0	0	0	1	0	0	0	0	1	0	5888
0	1	0	0	70	1	120	47	465.9	1065	1	0	1	0	0	0	0	0	1	0	0	0	0	1	0	3900
1	0	0	0	127	1	120	50	620.1	1164	1	0	1	0	0	0	0	0	1	0	0	0	0	1	0	3646
1	0	0	0	136	1	120	54.2	1258	1470	1	0	1	0	0	0	0	0	1	0	0	0	0	1	0	5951
0	1	0	0	47	1	120	47	465.9	1065	1	0	1	0	0	0	0	0	1	0	0	0	0	1	0	6145
1	0	0	0	233	1	120	45	539.6	882	1	0	1	0	0	0	0	0	1	0	0	0	0	1	0	4231
1	0	0	0	58	1	130	64.8	996	1470	1	0	1	0	0	0	0	0	1	0	0	0	0	1	0	3397
0	0	0	1	155	2	120	46	664.7	1877	1	0	1	0	0	0	1	0	0	0	0	0	0	1	0	7450
0	0	1	0	312	1	140	52.8	491.4	1212	1	0	1	0	0	0	0	0	1	0	0	0	0	1	0	1747
1	0	0	0	349	1	120	47	465.9	1065	1	0	1	0	0	0	0	0	1	0	0	0	0	1	0	4600
0	0	1	0	64	1	130	65	1162	1433	1	0	1	0	0	0	0	0	1	0	0	0	0	1	0	10350
0	0	1	0	145	1	120	45	539.6	882	1	0	1	0	0	0	0	0	1	0	0	0	0	1	0	120
1	0	0	0	53	1	130	39.1	320.4	771	1	0	1	0	0	0	0	0	0	1	0	0	0	1	0	2904
1	0	0	0	212	1	130	33	299.1	1037	1	0	1	0	0	0	0	0	1	0	0	0	0	1	0	4162
0	0	1	0	266	1	120	39.5	372.5	735	1	0	1	0	0	0	0	0	1	0	0	0	0	1	0	3966
1	0	0	0	169	1	120	54.2	1258	1470	1	0	1	0	0	0	0	0	1	0	0	0	0	1	0	5170
1	0	0	0	260	1	138	38.8	310.3	882	1	0	1	0	0	0	0	0	0	1	0	0	0	1	0	2025
0	0	1	0	140	2	120	46	614	918	1	0	1	0	0	0	0	0	1	0	0	0	0	0	1	30000
0	1	0	0	70	2	130	46	664.9	1877	1	0	1	0	0	0	0	0	1	0	0	0	0	0	1	2760
0	0	1	0	42	1	120	64.8	970.2	1341	1	0	1	0	0	0	0	0	1	0	0	0	0	1	0	14430
0	0	1	0	324	1	134	29	264.4	698	1	0	1	0	0	0	0	0	0	1	0	0	0	1	0	5010
0	1	0	0	68	1	140	40.5	438.6	882	1	0	1	0	0	0	0	0	1	0	0	0	0	1	0	3042
1	0	0	0	9	1	120	64.8	970.2	1341	1	0	1	0	0	0	0	0	1	0	0	0	0	1	0	11650
1	0	0	0	16	1	130	64.8	970.2	1341	1	0	1	0	0	0	0	0	0	1	0	0	0	1	0	15060
0	0	1	0	168	1	120	29	264.4	698	1	0	1	0	0	0	0	0	1	0	0	0	0	1	0	5045
0	0	1	0	293	1	138	38.8	310.3	882	1	0	1	0	0	0	0	0	0	1	0	0	0	1	0	1125
1	0	0	0	208	1	120	45	539.6	882	1	0	1	0	0	0	0	0	1	0	0	0	0	1	0	3859
0	1	0	0	150	1	135	42	471	808	1	0	1	0	0	0	0	1	0	0	0	0	0	0	1	6202
1	0	0	0	14	1	130	65	1162	1433	1	0	1	0	0	0	0	0	1	0	0	0	0	1	0	7146
1	0	0	0	139	1	120	64.8	970.2	1341	1	0	1	0	0	0	0	0	0	1	0	0	0	1	0	7410
0	0	1	0	211	1	120	63.5	1075	1189	1	0	1	0	0	0	0	0	1	0	0	0	0	1	0	6520
1	0	0	0	163	1	120	29	264.4	698	1	0	1	0	0	0	0	0	1	0	0	0	0	1	0	840
0	1	0	0	214	1	130	80.3	1513	2207	1	0	0	1	0	0	0	0	1	0	0	0	0	1	0	16230
0	0	1	0	225	1	130	33	299.1	1037	1	0	1	0	0	0	0	0	1	0	0	0	0	1	0	1337
0	0	1	0	301	1	134	38.3	360	588	1	0	1	0	0	0	0	0	0	1	0	0	0	1	0	4772
0	1	0	0	134	2	120	46	666.5	1139	1	0	1	0	0	0	0	0	1	0	0	0	0	0	1	400
1	0	0	0	129	1	120	37.2	388.2	588	1	0	1	0	0	0	0	0	0	1	0	0	0	1	0	5380
0	1	0	0	169	2	120	46	664.9	1877	1	0	1	0	0	0	0	0	1	0	0	0	0	0	1	3300
0	0	1	0	140	1	120	43	358.1	588	1	0	1	0	0	0	0	0	1	0	0	0	0	1	0	14596
1	0	0	0	317	1	134	29	264.4	698	1	0	1	0	0	0	0	0	0	1	0	0	0	1	0	1283
0	0	1	0	225	1	120	42.7	338.9	588	1	0	1	0	0	0	0	0	0	1	0	0	0	1	0	3722
0	1	0	0	285	1	130	64.6	811.5	1471	1	0	0	1	0	0	0	0	1	0	0	0	0	1	0	11680
0	1	0	0	274	2	130	42	434.5	882	1	0	1	0	0	0	1	0	0	0	0	0	0	0	1	400
0	1	0	0	114	2	120	46	614	918	3	0	1	0	0	0	1	0	0	0	0	0	0	0	1	400
0	1	0	0	253	1	140	61.2	916.3	478	1	0	0	1	1	0	0	0	0	0	1	0	0	0	0	435
1	0	0	0	24	1	130	42	376.9	588	1	0	1	0	0	0	0	0	0	1	0	0	0	1	0	4680
1	0	0	0	35	1	130	58.2	813.6	1043	1	0	1	0	0	0	0	0	0	1	0	0	0	1	0	19870
1	0	0	0	185	1	130	37.7	415.7	882	1	0	1	0	0	0	0	0	1	0	0	0	0	1	0	1144
0	1	0	0	108	1	140	61.2	916.3	478	2	0	0	1	1	0	0	0	0	0	0	1	0	0	0	4420
0	1	0	0	116	2	120	45	742.6	1176	1	0	1	0	0	0	0	0	0	1	0	0	0	0	1	2832
1	0	0	0	290	1	138	38.8	310.3	882	1	0	1	0	0	0	0	0	0	1	0	0	0	1	0	1975
1	0	0	0	263	1	120	67.2	1089	1078	1	0	1	0	0	0	0	0	0	1	0	0	0	1	0	2460
1	0	0	0	147	1	120	64.8	996	1470	1	0	1	0	0	0	0	0	1	0	0	0	0	1	0	5135
1	0	0	0	122	1	120	29	264.4	698	1	0	1	0	0	0	0	0	1	0	0	0	0	1	0	2742
0	1	0	0	122	2	120	46	614	918	5	0	1	0	0	0	1	0	0	0	0	0	0	0	1	0
0	0	1	0	40	1	120	42.7	338.9	588	1	0	1	0	0	0	0	0	1	0	0	0	0	1	0	3670
0	0	1	0	164	2	120	46	614	918	7	0	1	0	0	0	0	0	1	0	0	0	0	0	1	0
0	1	0	0	144	1	140	61.2	916.3	478	1	0	0	1	1	0	0	0	0	0	1	0	0	0	0	1040
1	0	0	0	71	1	120	54.2	1258	1470	1	0	1	0	0	0	0	0	1	0	0	0	0	1	0	3993
1	0	0	0	249	1	138	38.8	310.3	882	1	0	1	0	0	0	0	0	0	1	0	0	0	1	0	2800
0	0	1	0	304	1	134	38.3	360	588	1	0	1	0	0	0	0	0	0	1	0	0	0	1	0	2177
0	1	0	0	123	2	120	46	614	918	3	0	1	0	0	0	0	0	1	0	0	0	0	0	1	0
1	0	0	0	101	1	120	37.2	388.2	588	1	0	1	0	0	0	0	0	0	1	0	0	0	1	0	5400
0	1	0	0	77	1	130	45	742.6	1176	1	0	1	0	0	0	0	0	1	0	0	0	0	1	0	4010
0	0	1	0	42	1	120	42.7	338.9	588	1	0	1	0	0	0	0	0	1	0	0	0	0	1	0	2533
0	0	1	0	300	1	120	39.5	372.5	735	1	0	1	0	0	0	0	0	1	0	0	0	0	1	0	718
0	1	0	0	212	1	130	53.6	924.3	919	3	0	0	1	0	0	0	0	0	1	0	0	0	1	0	0
1	0	0	0	202	1	120	47	465.9	1065	1	0	1	0	0	0	0	0	1	0	0	0	0	1	0	3715
0	1	0	0	136	2	120	43.1	494.5	845	9	0	1	0	0	0	0	0	1	0	0	0	0	0	1	0
0	0	1	0	114	1	120	39.5	372.5	735	1	0	1	0	0	0	0	0	1	0	0	0	0	1	0	2340
0	0	1	0	71	1	130	53.6	924.3	919	1	0	0	1	0	0	0	0	1	0	0	0	0	1	0	15050
1	0	0	0	124	2	120	45	742.6	1176	1	0	1	0	0	0	0	0	0	1	0	0	0	0	1	5515
1	0	0	0	58	1	120	45	742.6	1176	1	0	1	0	0	0	0	0	1	0	0	0	0	1	0	1815
1	0	0	0	213	1	120	47	465.9	1065	1	0	1	0	0	0	0	0	1	0	0	0	0	1	0	4792
0	1	0	0	177	1	140	61.2	916.3	478	2	0	0	1	1	0	0	0	0	0	1	0	0	0	0	2060
1	0	0	0	33	1	136	39.5	372.5	735	1	0	1	0	0	0	0	0	1	0	0	0	0	1	0	718
1	0	0	0	85	1	130	42	376.9	588	1	0	1	0	0	0	0	0	1	0	0	0	1	0	0	4120
0	0	1	0	116	1	120	39.5	372.5	735	1	0	1	0	0	0	0	0	1	0	0	0	0	1	0	2903
0	0	1	0	240	1	130	65	1162	1433	1	0	1	0	0	0	0	0	1	0	0	0	0	1	0	5893
0	0	1	0	193	1	130	33	299.1	1037	1	0	1	0	0	0	0	0	1	0	0	0	0	1	0	5436
1	0	0	0	169	1	120	47	465.9	1065	1	0	1	0	0	0	0	0	1	0	0	0	0	1	0	4933
1	0	0	0	40	1	130	29	264.4	698	1	0	1	0	0	0	0	0	0	1	0	0	0	1	0	3205
1	0	0	0	248	1	140	37.7	415.7	882	1	0	1	0	0	0	0	0	1	0	0	0	0	1	0	3383
0	1	0	0	278	1	135	60	993.4	1433	1	0	1	0	0	0	0	0	1	0	0	0	0	1	0	3805
1	0	0	0	145	1	120	50	620.1	1164	1	0	1	0	0	0	0	0	1	0	0	0	0	1	0	3088
0	1	0	0	158	2	120	46	664.9	1877	2	0	1	0	0	0	0	0	1	0	0	0	0	0	1	0
0	0	1	0	269	1	120	38.3	360	588	1	0	1	0	0	0	0	0	1	0	0	0	0	1	0	6798
0	1	0	0	169	2	120	46	664.9	1877	1	0	1	0	0	0	0	0	1	0	0	0	0	0	1	3737
1	0	0	0	79	1	120	54.2	1258	1470	1	0	1	0	0	0	0	0	1	0	0	0	0	1	0	4565
0	1	0	0	139	1	120	42	376.9	588	1	0	1	0	0	1	0	0	0	0	0	0	0	1	0	3648
0	0	1	0	203	1	130	65	1162	1433	1	0	1	0	0	0	0	0	1	0	0	0	0	1	0	8026
0	0	1	0	307	1	120	84.9	2382	2648	1	0	0	1	0	0	0	0	1	0	0	0	0	1	0	11500
1	0	1	0	96	1	120	29	264.4	698	1	0	1	0	0	0	0	0	1	0	0	0	0	1	0	3267
0	0	1	0	63	1	130	65	1162	1433	1	0	1	0	0	0	0	0	1	0	0	0	0	1	0	4818
1	0	0	0	73	1	125	63.5	1075	1189	2	0	1	0	0	0	0	0	0	1	0	0	0	1	0	0
0	0	0	1	262	1	130	64.6	811.5	1471	1	0	0	1	0	0	0	0	1	0	0	0	0	1	0	49360
1	0	0	0	173	1	120	47	465.9	1065	1	0	1	0	0	0	0	0	1	0	0	0	0	1	0	3651
0	1	0	0	178	1	142	44.8	756	1103	1	1	0	0	0	0	0	0	1	0	0	0	0	1	0	2428
0	1	0	0	98	1	130	38.8	310.3	882	1	0	1	0	0	0	0	0	1	0	0	0	0	1	0	4743
0	0	1	0	276	1	120	60	940.5	1471	1	0	0	1	0	0	0	0	1	0	0	0	0	1	0	7160
1	0	0	0	209	1	120	38.8	310.3	882	1	0	1	0	0	0	0	0	1	0	0	0	0	1	0	1650
1	0	0	0	94	1	130	40.5	438.6	882	1	0	1	0	0	0	0	0	1	0	0	0	0	1	0	4282
1	0	0	0	43	1	120	65	1162	1433	1	0	1	0	0	0	0	0	1	0	0	0	0	1	0	7074
0	0	0	1	150	1	130	71.1	1256	699	2	0	0	1	1	0	0	0	0	0	0	1	0	0	0	0
0	0	1	0	311	1	120	39.5	372.5	735	1	0	1	0	0	0	0	0	1	0	0	0	0	1	0	4502
0	0	1	0	274	1	134	29	264.4	698	1	0	1	0	0	0	0	0	0	1	0	0	0	1	0	4350
1	0	0	0	112	1	120	64.8	996	1470	1	0	1	0	0	0	0	0	1	0	0	0	0	1	0	4740
0	0	0	1	310	1	120	84.9	2382	2648	1	0	0	1	0	0	0	0	1	0	0	0	0	1	0	31400
0	0	1	0	204	1	130	65	1162	1433	1	0	1	0	0	0	0	0	1	0	0	0	0	1	0	7444
1	0	0	0	175	1	120	64.8	996	1470	1	0	1	0	0	0	0	0	1	0	0	0	0	1	0	5320
0	0	0	1	105	1	130	53.6	924.3	919	1	0	0	1	0	0	0	0	1	0	0	0	0	1	0	7640
1	0	0	0	134	2	120	45	742.6	1176	1	0	1	0	0	0	0	0	0	1	0	0	0	0	1	4962
0	0	1	0	67	1	130	38.8	310.3	882	1	0	1	0	0	0	0	0	1	0	0	0	0	1	0	3315
0	1	0	0	101	1	140	61.2	916.3	478	1	0	0	1	1	0	0	0	0	0	0	1	0	0	0	750
0	0	1	0	69	2	132	53	669.3	1470	1	0	1	0	0	0	0	0	0	1	0	0	0	0	1	34410
0	0	1	0	272	1	134	29	264.4	698	1	0	1	0	0	0	0	0	0	1	0	0	0	1	0	4735
0	1	0	0	184	1	140	61.2	916.3	478	1	0	0	1	1	0	0	0	0	0	1	0	0	0	0	3540
1	0	0	0	313	1	138	38.8	310.3	882	1	0	1	0	0	0	0	0	0	1	0	0	0	1	0	2700
0	0	1	0	243	1	120	39.1	320.4	771	1	0	1	0	0	0	0	0	1	0	0	0	0	1	0	5016
0	1	0	0	242	1	130	53.6	924.3	919	1	0	0	1	0	0	0	0	0	1	0	0	0	1	0	15700
0	0	1	0	322	1	134	38.3	360	588	1	0	1	0	0	0	0	0	0	1	0	0	0	1	0	1756
1	0	0	0	142	2	120	46	664.7	1877	1	0	1	0	0	0	1	0	0	0	0	0	0	1	0	3857
0	1	0	0	155	1	140	61.2	916.3	478	1	0	0	1	1	0	0	0	0	0	1	0	0	0	0	4660
0	0	1	0	70	1	135	80.3	1598	2207	1	0	0	1	0	0	0	0	1	0	0	0	0	1	0	6950
1	0	0	0	234	1	120	39.5	372.5	735	1	0	1	0	0	0	0	0	1	0	0	0	0	1	0	3378
1	0	0	0	77	1	120	38.3	360	588	1	0	1	0	0	0	0	0	1	0	0	0	0	1	0	3355
0	0	1	0	233	1	120	58.2	813.6	1043	1	0	1	0	0	0	0	0	1	0	0	0	0	1	0	9040
0	1	0	0	83	1	125	56.6	705.6	1300	1	0	1	0	0	0	0	0	0	1	0	0	0	1	0	6150
0	1	0	0	234	1	130	64.6	811.5	1471	1	0	0	1	0	0	0	0	1	0	0	0	0	1	0	12140
1	0	0	0	100	1	120	37.2	388.2	588	1	0	1	0	0	0	0	0	0	1	0	0	0	1	0	3475
0	1	0	0	65	1	120	45	742.6	1176	1	0	1	0	0	0	0	0	1	0	0	0	0	1	0	930
1	0	0	0	257	1	130	50	620.1	1164	1	0	1	0	0	0	0	0	0	1	0	0	0	1	0	2570
0	1	0	0	78	1	150	29	252.3	588	1	0	0	1	1	0	0	0	0	0	0	1	0	0	0	3200
1	0	0	0	117	1	120	47.1	538.7	1300	1	0	1	0	0	0	0	0	0	1	0	0	0	1	0	7250
0	0	1	0	67	1	120	42.7	338.9	588	1	0	1	0	0	0	0	0	1	0	0	0	0	1	0	2087
0	1	0	0	139	1	135	42	471	808	1	0	1	0	0	0	0	1	0	0	0	0	0	0	1	13742
0	1	0	0	180	2	120	46	664.9	1877	2	0	1	0	0	0	0	0	1	0	0	0	0	0	1	0
1	0	0	0	30	1	120	42.7	338.9	588	1	0	1	0	0	0	0	0	0	1	0	0	0	1	0	4347
0	0	0	1	155	2	120	46	664.7	1877	1	0	1	0	0	0	1	0	0	0	0	0	0	1	0	4045
0	1	0	0	129	2	120	46	614	918	1	0	1	0	0	0	0	0	1	0	0	0	0	0	1	1000
0	1	0	0	285	1	140	61.2	916.3	478	1	0	0	1	1	0	0	0	0	0	1	0	0	0	0	275
1	0	0	0	119	1	125	56.6	705.6	1300	1	0	1	0	0	0	0	0	0	1	0	0	0	1	0	6555
0	0	1	0	229	1	130	65	1162	1433	1	0	1	0	0	0	0	0	1	0	0	0	0	1	0	6463
1	0	0	0	93	1	130	38.8	310.3	882	1	0	1	0	0	0	0	0	1	0	0	0	0	1	0	3162
1	0	0	0	144	1	120	45	539.6	882	1	0	1	0	0	0	0	0	1	0	0	0	0	1	0	161
0	0	1	0	170	2	120	46	666.5	1139	2	0	1	0	0	0	0	0	1	0	0	0	0	0	1	0
1	0	0	0	63	1	130	67	1493	1470	1	0	1	0	0	0	0	0	0	1	0	0	0	1	0	18912
0	0	1	0	60	1	130	42	376.9	588	1	0	1	0	0	0	0	0	1	0	0	0	0	1	0	4050
0	0	1	0	179	2	120	46	666.5	1139	1	0	1	0	0	0	0	0	1	0	0	0	0	0	1	5000
0	0	1	0	107	1	140	52.8	491.4	1212	1	0	1	0	0	0	0	0	1	0	0	0	0	1	0	8399
0	0	1	0	88	1	120	29	264.4	698	1	0	1	0	0	0	0	0	1	0	0	0	0	1	0	7397
1	0	0	0	97	1	120	64.8	996	1470	1	0	1	0	0	0	0	0	1	0	0	0	0	1	0	9165
0	0	1	1	91	1	120	84.9	2382	2648	1	0	0	1	0	0	0	0	1	0	0	0	0	1	0	2900
0	0	1	0	33	1	130	42	376.9	588	1	0	1	0	0	0	0	0	1	0	0	0	0	1	0	5180
1	0	0	0	74	1	130	67	1493	1470	1	0	1	0	0	0	0	0	0	1	0	0	0	1	0	7504
0	1	0	0	266	2	130	42	434.5	882	1	0	1	0	0	0	1	0	0	0	0	0	0	0	1	800
1	0	0	0	86	1	140	52.8	491.4	1212	1	0	1	0	0	0	0	0	1	0	0	0	0	1	0	1924
1	0	0	0	38	1	120	65	1162	1433	1	0	1	0	0	0	0	0	1	0	0	0	0	1	0	10933
0	1	0	0	299	2	130	42	434.5	882	1	0	1	0	0	0	1	0	0	0	0	0	0	0	1	4000
1	0	0	0	242	1	120	39.5	372.5	735	1	0	1	0	0	0	0	0	1	0	0	0	0	1	0	3142
1	0	0	0	56	1	120	37.2	388.2	588	1	0	1	0	0	0	0	0	0	1	0	0	0	1	0	4078
0	0	1	0	212	1	130	64.8	970.2	1341	1	0	1	0	0	0	0	0	1	0	0	0	0	1	0	7680
1	0	0	0	52	1	120	54.2	1258	1470	1	0	1	0	0	0	0	0	1	0	0	0	0	1	0	11747
0	1	0	0	287	1	130	80.3	1513	2207	1	0	0	1	0	0	0	0	1	0	0	0	0	1	0	17810
0	1	0	0	72	2	132	53	669.3	1470	2	0	1	0	0	0	0	0	0	1	0	0	0	0	1	127
0	1	0	0	81	2	120	46	664.9	1877	1	0	1	0	0	0	0	0	1	0	0	0	0	0	1	200
0	0	1	0	239	1	120	60	940.5	1471	1	0	0	1	0	0	0	0	1	0	0	0	0	1	0	8780
1	0	0	0	44	1	120	50	620.1	1164	1	0	1	0	0	0	0	0	1	0	0	0	0	1	0	2140
1	0	0	0	52	1	125	63.5	1075	1189	1	0	1	0	0	0	0	0	0	1	0	0	0	1	0	30100
0	0	1	0	255	1	140	52.8	491.4	1212	1	0	1	0	0	0	0	0	1	0	0	0	0	1	0	3034
0	1	0	0	88	1	130	45	742.6	1176	1	0	1	0	0	0	0	0	1	0	0	0	0	1	0	800
1	0	0	0	106	1	120	54.2	1258	1470	1	0	1	0	0	0	0	0	1	0	0	0	0	1	0	8184
0	1	0	0	165	2	120	46	664.9	1877	5	0	1	0	0	0	0	0	1	0	0	0	0	0	1	0
0	1	0	0	181	2	120	46	664.9	1877	2	0	1	0	0	0	0	0	1	0	0	0	0	0	1	8648
0	1	0	0	238	1	130	80.3	1598	2207	1	0	0	1	0	0	0	0	1	0	0	0	0	1	0	9050
1	0	0	0	363	1	120	47	465.9	1065	1	0	1	0	0	0	0	0	1	0	0	0	0	1	0	2100
1	0	0	0	128	2	150	46	664.9	1877	1	0	1	0	0	0	0	0	0	1	0	0	0	0	1	3529
1	0	0	0	35	1	130	64.8	996	1470	1	0	1	0	0	0	0	0	1	0	0	0	0	1	0	8521
1	0	0	0	115	1	120	47.1	538.7	1300	1	0	1	0	0	0	0	0	0	1	0	0	0	1	0	6600
0	0	0	1	95	1	130	53.6	924.3	919	1	0	0	1	0	0	0	0	1	0	0	0	0	1	0	6920
0	0	1	0	313	1	134	38.3	360	588	1	0	1	0	0	0	0	0	0	1	0	0	0	1	0	1198
0	0	1	0	80	1	130	42	376.9	588	1	0	1	0	0	0	0	0	1	0	0	0	0	1	0	8100
0	0	1	0	86	2	130	46	664.9	1877	2	0	1	0	0	0	0	0	1	0	0	0	0	0	1	0
1	0	0	0	116	1	120	47.1	538.7	1300	1	0	1	0	0	0	0	0	0	1	0	0	0	1	0	6200
1	0	0	0	16	1	130	65	1162	1433	1	0	1	0	0	0	0	0	1	0	0	0	0	1	0	7248
0	1	0	0	65	2	125	46	664.9	1877	1	0	1	0	0	0	0	0	1	0	0	0	0	0	1	960
0	0	1	0	274	1	120	39.5	372.5	735	8	0	1	0	0	0	0	0	1	0	0	0	0	1	0	0
0	0	1	0	183	1	130	80.3	1598	2207	1	0	0	1	0	0	0	0	1	0	0	0	0	1	0	11250
0	1	0	0	166	1	120	29	252.3	588	1	0	0	1	1	0	0	0	0	0	1	0	0	0	0	300
0	0	1	0	105	1	135	80.3	1598	2207	1	0	0	1	0	0	0	0	1	0	0	0	0	1	0	6700
1	0	0	0	266	1	120	50	620.1	1164	1	0	1	0	0	0	0	0	1	0	0	0	0	1	0	1969
0	0	1	0	279	1	134	29	264.4	698	1	0	1	0	0	0	0	0	0	1	0	0	0	1	0	3520
0	0	1	0	233	1	120	42.7	338.9	588	1	0	1	0	0	0	0	0	0	1	0	0	0	1	0	4642
1	0	0	0	84	1	130	65	1162	1433	1	0	1	0	0	0	0	0	1	0	0	0	0	1	0	11350
0	1	0	0	211	1	130	53.6	924.3	919	3	0	0	1	0	0	0	0	0	1	0	0	0	1	0	0
0	0	1	0	103	1	140	52.8	491.4	1212	1	0	1	0	0	0	0	0	1	0	0	0	0	1	0	2945
0	1	0	0	118	2	120	46	614	918	1	0	1	0	0	0	1	0	0	0	0	0	0	0	1	1000
0	0	1	0	323	1	120	39.5	372.5	735	1	0	1	0	0	0	0	0	1	0	0	0	0	1	0	1402
0	0	0	1	155	1	120	37.2	388.2	588	1	0	1	0	0	0	0	0	0	1	0	0	0	1	0	8550
0	0	1	0	100	1	130	42	376.9	588	1	0	1	0	0	0	0	0	1	0	0	0	0	1	0	7440
0	1	0	0	194	1	140	61.2	916.3	478	1	0	0	1	1	0	0	0	0	0	1	0	0	0	0	9260
0	1	0	0	94	1	120	50	620.1	1164	1	0	1	0	0	0	0	0	1	0	0	0	0	1	0	1812
1	0	0	0	27	1	130	58.2	813.6	1043	1	0	1	0	0	0	0	0	0	1	0	0	0	1	0	7227
0	0	0	1	103	1	120	39.5	372.5	735	1	0	1	0	0	0	0	0	1	0	0	0	0	1	0	4906
0	0	1	0	168	2	120	46	666.5	1139	2	0	1	0	0	0	0	0	1	0	0	0	0	0	1	0
0	1	0	0	199	1	142	44.8	756	1103	1	1	0	0	0	0	0	0	1	0	0	0	0	1	0	3771
0	0	1	0	108	1	130	58.2	813.6	1043	1	0	1	0	0	0	0	0	1	0	0	0	0	1	0	17789
0	1	0	0	106	2	120	45	742.6	1176	1	0	1	0	0	0	0	0	0	1	0	0	0	0	1	648
1	0	0	0	112	1	120	43	358.1	588	1	0	1	0	0	0	0	0	0	1	0	0	0	1	0	1330
1	0	0	0	200	1	130	33	299.1	1037	1	0	1	0	0	0	0	0	1	0	0	0	0	1	0	3767
0	0	1	0	35	1	120	64.8	970.2	1341	1	0	1	0	0	0	0	0	1	0	0	0	0	1	0	3465
0	0	1	0	105	1	140	52.8	491.4	1212	1	0	1	0	0	0	0	0	1	0	0	0	0	1	0	10978
0	0	1	0	333	1	120	39.5	372.5	735	1	0	1	0	0	0	0	0	1	0	0	0	0	1	0	7834
0	1	0	0	161	2	120	46	664.9	1877	1	0	1	0	0	0	0	0	1	0	0	0	0	0	1	900
1	0	0	0	119	1	120	64.8	970.2	1341	1	0	1	0	0	0	0	0	0	1	0	0	0	1	0	2860
0	1	0	0	263	2	130	42	434.5	882	1	0	1	0	0	0	1	0	0	0	0	0	0	0	1	1000
0	1	0	0	160	2	120	46	666.5	1139	3	0	1	0	0	0	0	0	1	0	0	0	0	0	1	4000
0	0	0	1	162	1	120	37.2	388.2	588	1	0	1	0	0	0	0	0	0	1	0	0	0	1	0	10050
0	0	1	0	282	1	120	60	940.5	1471	1	0	0	1	0	0	0	0	1	0	0	0	0	1	0	3990
0	0	1	0	329	1	120	39.5	372.5	735	1	0	1	0	0	0	0	0	1	0	0	0	0	1	0	2040
1	0	0	0	87	1	130	42	376.9	588	1	0	1	0	0	0	0	0	1	0	0	0	1	0	0	3680
0	1	0	0	79	1	130	38.8	310.3	882	1	0	1	0	0	0	0	0	1	0	0	0	0	1	0	3009
0	0	1	0	188	1	120	42	376.9	588	1	0	1	0	0	1	0	0	0	0	0	0	0	1	0	5260
0	0	1	0	196	1	120	63.5	1075	1189	1	0	1	0	0	0	0	0	1	0	0	0	0	1	0	5736
1	0	0	0	131	2	120	45	742.6	1176	1	0	1	0	0	0	0	0	0	1	0	0	0	0	1	6265
1	0	0	0	145	1	120	64.8	996	1470	1	0	1	0	0	0	0	0	1	0	0	0	0	1	0	5925
0	0	1	0	198	1	130	65	1162	1433	1	0	1	0	0	0	0	0	1	0	0	0	0	1	0	8259
0	1	0	0	39	1	130	45	742.6	1176	1	0	1	0	0	0	0	0	1	0	0	0	0	1	0	11000
0	1	0	0	53	1	120	45	742.6	1176	1	0	1	0	0	0	0	0	1	0	0	0	0	1	0	3680
1	0	0	0	154	1	125	56.6	705.6	1300	1	0	1	0	0	0	0	0	1	0	0	0	0	1	0	3865
0	0	1	0	134	1	130	63.5	1075	1189	1	0	1	0	0	0	0	0	1	0	0	0	0	1	0	6588
1	0	0	0	48	1	130	39.1	320.4	771	1	0	1	0	0	0	0	0	0	1	0	0	0	1	0	5412
0	0	1	0	143	2	120	46	666.5	1139	1	0	1	0	0	0	0	0	1	0	0	0	0	0	1	7000
0	0	1	0	240	1	120	64.8	1106	1470	1	0	1	0	0	0	0	0	1	0	0	0	0	1	0	3559
0	1	0	0	256	1	130	64.6	811.5	1471	1	0	0	1	0	0	0	0	1	0	0	0	0	1	0	7280
0	0	1	0	106	1	140	52.8	491.4	1212	1	0	1	0	0	0	0	0	1	0	0	0	0	1	0	11653
0	1	0	0	172	1	120	29	252.3	588	1	0	0	1	1	0	0	0	0	0	1	0	0	0	0	1500
0	0	1	0	70	1	130	38.8	310.3	882	1	0	1	0	0	0	0	0	1	0	0	0	0	1	0	7437
0	1	0	0	38	2	130	46	664.9	1877	1	0	1	0	0	0	0	0	1	0	0	0	0	0	1	1800
0	0	1	0	48	1	120	64.8	970.2	1341	1	0	1	0	0	0	0	0	1	0	0	0	0	1	0	6885
1	0	0	0	164	1	120	54.2	1258	1470	1	0	1	0	0	0	0	0	1	0	0	0	0	1	0	6457
0	1	0	0	90	1	120	47	465.9	1065	1	0	1	0	0	0	0	0	1	0	0	0	0	1	0	5400
0	0	1	0	227	1	120	38.8	310.3	882	1	0	1	0	0	0	0	0	1	0	0	0	0	1	0	3225
0	1	0	0	57	2	132	53	669.3	1470	1	0	1	0	0	0	0	0	0	1	0	0	0	0	1	26
1	0	0	0	143	1	120	64.8	996	1470	1	0	1	0	0	0	0	0	1	0	0	0	0	1	0	5450
0	1	0	0	40	1	130	45	742.6	1176	1	0	1	0	0	0	0	0	1	0	0	0	0	1	0	10684
0	0	1	0	215	1	130	65	1162	1433	1	0	1	0	0	0	0	0	1	0	0	0	0	1	0	8694
0	1	0	0	280	1	130	64.6	811.5	1471	1	0	0	1	0	0	0	0	1	0	0	0	0	1	0	2730
1	0	0	0	144	1	120	64.8	970.2	1341	1	0	1	0	0	0	0	0	0	1	0	0	0	1	0	7810
0	1	0	0	111	2	120	45	742.6	1176	1	0	1	0	0	0	0	0	0	1	0	0	0	0	1	4028
0	0	0	1	102	1	130	53.6	924.3	919	1	0	0	1	0	0	0	0	0	1	0	0	0	1	0	2800
0	1	0	0	112	2	120	46	614	918	3	0	1	0	0	0	1	0	0	0	0	0	0	0	1	0
1	0	0	0	206	1	120	45	539.6	882	1	0	1	0	0	0	0	0	1	0	0	0	0	1	0	1994
1	0	0	0	68	1	120	50	620.1	1164	1	0	1	0	0	0	0	0	1	0	0	0	0	1	0	2838
0	1	0	0	77	1	120	45	742.6	1176	1	0	1	0	0	0	0	0	1	0	0	0	0	1	0	1563
1	0	0	0	100	1	120	39.1	320.4	771	1	0	1	0	0	0	0	0	0	1	0	0	0	1	0	4320
0	0	1	0	218	1	120	38.8	310.3	882	1	0	1	0	0	0	0	0	1	0	0	0	0	1	0	3420
1	0	0	0	196	1	140	37.7	415.7	882	1	0	1	0	0	0	0	0	1	0	0	0	0	1	0	2465
1	0	0	0	25	1	120	42.7	338.9	588	1	0	1	0	0	0	0	0	0	1	0	0	0	1	0	5048
0	0	1	0	318	1	120	39.5	372.5	735	1	0	1	0	0	0	0	0	1	0	0	0	0	1	0	2082
1	0	0	0	302	1	120	39.5	372.5	735	1	0	1	0	0	0	0	0	1	0	0	0	0	1	0	2876
1	0	0	0	172	1	120	54.2	1258	1470	1	0	1	0	0	0	0	0	1	0	0	0	0	1	0	5874
1	0	0	0	231	1	120	45	539.6	882	1	0	1	0	0	0	0	0	1	0	0	0	0	1	0	2851
0	0	1	0	145	2	120	43.1	494.5	845	4	0	1	0	0	0	0	0	1	0	0	0	0	0	1	0
0	0	1	0	212	1	120	60	940.5	1471	1	0	0	1	0	0	0	0	1	0	0	0	0	1	0	5560
1	0	0	0	53	1	130	42	376.9	588	1	0	1	0	0	0	0	0	0	1	0	0	0	1	0	2550
0	0	1	0	207	1	130	64.8	970.2	1341	1	0	1	0	0	0	0	0	1	0	0	0	0	1	0	3031
1	0	0	0	82	1	120	47.1	538.7	1300	2	0	1	0	0	0	0	0	0	1	0	0	0	1	0	830
1	0	0	0	133	2	130	46	664.9	1877	1	0	1	0	0	0	0	0	0	1	0	0	0	0	1	2736
0	0	1	0	144	1	130	58.2	813.6	1043	1	0	1	0	0	0	0	0	1	0	0	0	0	1	0	7635
0	1	0	0	160	2	120	46	664.9	1877	1	0	1	0	0	0	0	0	1	0	0	0	0	0	1	3737
1	0	0	0	36	1	130	29	264.4	698	1	0	1	0	0	0	0	0	0	1	0	0	0	1	0	3485
1	0	0	0	81	1	130	67	1493	1470	1	0	1	0	0	0	0	0	0	1	0	0	0	1	0	3590
1	0	0	0	100	1	130	64.8	970.2	1341	1	0	1	0	0	0	0	0	0	1	0	0	0	1	0	6400
0	1	0	0	87	1	120	47.1	538.7	1300	1	0	1	0	0	0	0	0	0	1	0	0	0	1	0	7070
0	0	1	0	223	1	130	33	299.1	1037	1	0	1	0	0	0	0	0	1	0	0	0	0	1	0	3350
0	0	1	0	186	1	120	38.3	360	588	1	0	1	0	0	0	0	0	1	0	0	0	0	1	0	1893
1	0	0	0	219	1	120	47	465.9	1065	1	0	1	0	0	0	0	0	1	0	0	0	0	1	0	3886
0	1	0	0	221	1	130	53.6	924.3	919	1	0	0	1	0	0	0	0	0	1	0	0	0	1	0	2100
0	1	0	0	65	2	130	46	664.9	1877	2	0	1	0	0	0	0	0	1	0	0	0	0	0	1	1500
1	0	0	0	181	1	120	47	465.9	1065	1	0	1	0	0	0	0	0	1	0	0	0	0	1	0	2954
0	0	1	0	74	1	130	53.6	924.3	919	1	0	0	1	0	0	0	0	1	0	0	0	0	1	0	6450
0	1	0	0	93	1	120	50	620.1	1164	1	0	1	0	0	0	0	0	1	0	0	0	0	1	0	3348
0	0	1	0	180	1	125	56.6	705.6	1300	1	0	1	0	0	0	0	0	1	0	0	0	0	1	0	6715
0	0	1	0	153	1	120	38.3	360	588	1	0	1	0	0	0	0	0	1	0	0	0	0	1	0	6501
0	0	1	0	167	1	120	29	264.4	698	1	0	1	0	0	0	0	0	1	0	0	0	0	1	0	3520
0	0	1	0	306	1	120	60	940.5	1471	1	0	0	1	0	0	0	0	1	0	0	0	0	1	0	1870
0	0	1	0	96	1	120	39.5	372.5	735	1	0	1	0	0	0	0	0	1	0	0	0	0	1	0	3449
0	1	0	0	268	1	140	61.2	916.3	478	1	0	0	1	1	0	0	0	0	0	1	0	0	0	0	565
1	0	0	0	43	1	120	50	620.1	1164	1	0	1	0	0	0	0	0	1	0	0	0	0	1	0	2568
0	0	1	0	174	1	120	38.3	360	588	1	0	1	0	0	0	0	0	1	0	0	0	0	1	0	5601
0	0	1	0	296	1	134	38.3	360	588	1	0	1	0	0	0	0	0	0	1	0	0	0	1	0	2112
1	0	0	0	34	1	140	40.5	438.6	882	2	0	1	0	0	0	0	0	1	0	0	0	0	1	0	0
1	0	0	0	229	1	140	37.7	415.7	882	1	0	1	0	0	0	0	0	1	0	0	0	0	1	0	2609
0	0	1	0	146	2	120	43.1	494.5	845	4	0	1	0	0	0	0	0	1	0	0	0	0	0	1	10180
1	0	0	0	120	2	120	45	742.6	1176	1	0	1	0	0	0	0	0	0	1	0	0	0	0	1	4040
0	0	1	0	252	1	120	39.1	320.4	771	1	0	1	0	0	0	0	0	1	0	0	0	0	1	0	3612
0	1	0	0	132	1	135	42	471	808	1	0	1	0	0	0	0	1	0	0	0	0	0	0	1	4560
0	0	1	0	158	2	120	46	614	918	1	0	1	0	0	0	0	0	1	0	0	0	0	0	1	20000
1	0	0	0	149	1	120	54.2	1258	1470	1	0	1	0	0	0	0	0	1	0	0	0	0	1	0	5720
1	0	0	0	19	1	130	67	1493	1470	1	0	1	0	0	0	0	0	0	1	0	0	0	1	0	14859
1	0	0	0	92	1	120	64.8	996	1470	1	0	1	0	0	0	0	0	1	0	0	0	0	1	0	5614
1	0	0	0	151	1	120	50	620.1	1164	1	0	1	0	0	0	0	0	1	0	0	0	0	1	0	2232
1	0	0	0	204	1	120	45	539.6	882	1	0	1	0	0	0	0	0	1	0	0	0	0	1	0	1382
0	0	1	0	115	2	120	53	929.4	1470	1	0	1	0	0	0	0	0	0	1	0	0	0	0	1	10227
0	0	1	0	171	1	120	45	539.6	882	1	0	1	0	0	0	0	0	1	0	0	0	0	1	0	565
0	0	1	0	175	1	120	38.3	360	588	1	0	1	0	0	0	0	0	1	0	0	0	0	1	0	5558
0	0	1	0	236	1	120	39.1	320.4	771	1	0	1	0	0	0	0	0	1	0	0	0	0	1	0	4896
1	0	0	0	95	1	130	42	376.9	588	1	0	1	0	0	0	0	0	1	0	0	0	1	0	0	3840
0	1	0	0	178	1	140	60.3	896.7	883	1	0	0	1	1	0	0	0	0	0	1	0	0	0	0	6805
1	0	0	0	28	1	130	60	993.4	1433	1	0	1	0	0	0	0	0	0	1	0	0	0	1	0	6919
0	0	1	0	106	1	120	38.3	360	588	1	0	1	0	0	0	0	0	1	0	0	0	0	1	0	6965
0	0	0	1	160	1	130	71.1	1256	699	1	0	0	1	1	0	0	0	0	0	0	1	0	0	0	2350
1	0	0	0	106	1	130	40.5	438.6	882	1	0	1	0	0	0	0	0	1	0	0	0	0	1	0	2707
0	1	0	0	248	1	130	80.3	1598	2207	1	0	0	1	0	0	0	0	1	0	0	0	0	1	0	2550
0	0	1	0	216	1	125	56.6	705.6	1300	1	0	1	0	0	0	0	0	1	0	0	0	0	1	0	7556
1	0	0	0	217	1	120	47	465.9	1065	1	0	1	0	0	0	0	0	1	0	0	0	0	1	0	901
1	0	1	0	100	1	120	29	264.4	698	1	0	1	0	0	0	0	0	1	0	0	0	0	1	0	2845
0	1	0	0	74	1	130	45	742.6	1176	1	0	1	0	0	0	0	0	1	0	0	0	0	1	0	2400
0	0	1	0	53	1	130	42	376.9	588	1	0	1	0	0	0	0	0	1	0	0	0	0	1	0	4690
0	1	0	0	24	1	120	42.7	338.9	588	1	0	1	0	0	0	0	0	1	0	0	0	0	1	0	576
1	0	0	0	175	1	120	47	465.9	1065	1	0	1	0	0	0	0	0	1	0	0	0	0	1	0	2769
1	0	0	0	330	1	120	50	620.1	1164	1	0	1	0	0	0	0	0	1	0	0	0	0	1	0	4450
1	0	0	0	77	1	130	58.2	813.6	1043	1	0	1	0	0	0	0	0	0	1	0	0	0	1	0	7402
1	0	0	0	60	1	130	64.8	970.2	1341	1	0	1	0	0	0	0	0	0	1	0	0	0	1	0	21580
0	1	0	0	105	2	120	45	742.6	1176	1	0	1	0	0	0	0	0	0	1	0	0	0	0	1	1212
0	0	1	0	211	1	120	43	358.1	588	1	0	1	0	0	0	0	0	1	0	0	0	0	1	0	5249
1	0	0	0	46	1	130	64.8	970.2	1341	1	0	1	0	0	0	0	0	0	1	0	0	0	1	0	8610
0	0	1	0	23	1	130	65	1162	1433	1	0	1	0	0	0	0	0	1	0	0	0	0	1	0	10723
0	0	1	0	213	1	120	64.8	1106	1470	1	0	1	0	0	0	0	0	1	0	0	0	0	1	0	5411
1	0	1	0	42	1	130	42	376.9	588	1	0	1	0	0	0	0	0	1	0	0	0	0	1	0	6840
1	0	0	0	33	1	140	40.5	438.6	882	2	0	1	0	0	0	0	0	1	0	0	0	0	1	0	2088
1	0	0	0	99	1	120	37.2	388.2	588	1	0	1	0	0	0	0	0	0	1	0	0	0	1	0	5255
1	0	0	0	127	2	120	46	664.7	1877	1	0	1	0	0	0	1	0	0	0	0	0	0	1	0	4338
0	1	0	0	121	1	130	58.2	813.6	1043	1	0	1	0	0	0	0	0	1	0	0	0	0	1	0	9577
0	0	0	1	220	1	130	80.3	1598	2207	1	0	0	1	0	0	0	0	1	0	0	0	0	1	0	23000
0	1	0	0	142	2	150	46	664.9	1877	1	0	1	0	0	0	0	0	0	1	0	0	0	0	1	3533
0	0	1	0	174	2	120	46	666.5	1139	1	0	1	0	0	0	0	0	1	0	0	0	0	0	1	3000
0	0	1	0	220	1	120	39.1	320.4	771	1	0	1	0	0	0	0	0	1	0	0	0	0	1	0	3672
1	0	0	0	189	1	120	47	465.9	1065	1	0	1	0	0	0	0	0	1	0	0	0	0	1	0	3702
0	0	1	0	331	1	134	29	264.4	698	1	0	1	0	0	0	0	0	0	1	0	0	0	1	0	2350
0	0	1	0	75	1	130	53.6	924.3	919	1	0	0	1	0	0	0	0	1	0	0	0	0	1	0	4370
1	0	0	0	46	1	120	42.7	338.9	588	1	0	1	0	0	0	0	0	0	1	0	0	0	1	0	6744
0	0	1	0	126	1	130	63.5	1075	1189	1	0	1	0	0	0	0	0	1	0	0	0	0	1	0	7884
0	0	1	0	139	1	120	29	264.4	698	1	0	1	0	0	0	0	0	1	0	0	0	0	1	0	6950
0	0	1	0	178	1	120	42	376.9	588	1	0	1	0	0	1	0	0	0	0	0	0	0	1	0	4858
1	0	0	0	33	1	120	37.2	388.2	588	1	0	1	0	0	0	0	0	0	1	0	0	0	1	0	8240
0	0	1	0	188	1	125	56.6	705.6	1300	2	0	1	0	0	0	0	0	1	0	0	0	0	1	0	5605
1	0	0	0	76	1	120	29	264.4	698	1	0	1	0	0	0	0	0	1	0	0	0	0	1	0	2267
1	0	0	0	102	1	120	47	465.9	1065	1	0	1	0	0	0	0	0	1	0	0	0	0	1	0	6900
0	0	0	1	264	1	130	64.6	811.5	1471	1	0	0	1	0	0	0	0	1	0	0	0	0	1	0	17930
0	0	1	0	264	1	120	29	264.4	698	1	0	1	0	0	0	0	0	1	0	0	0	0	1	0	1720
0	0	0	1	104	1	130	53.6	924.3	919	1	0	0	1	0	0	0	0	1	0	0	0	0	1	0	11830
0	1	0	0	237	1	130	53.6	924.3	919	1	0	0	1	0	0	0	0	0	1	0	0	0	1	0	10500
0	0	1	0	277	1	120	84.9	2382	2648	1	0	0	1	0	0	0	0	1	0	0	0	0	1	0	7300
0	0	1	0	249	1	130	80.3	1598	2207	1	0	0	1	0	0	0	0	1	0	0	0	0	1	0	2300
0	0	1	0	83	1	130	42	376.9	588	1	0	1	0	0	0	0	0	1	0	0	0	1	0	0	2770
0	0	1	0	117	1	120	38.3	360	588	1	0	1	0	0	0	0	0	1	0	0	0	0	1	0	9153
0	0	1	0	252	1	120	58.2	813.6	1043	1	0	1	0	0	0	0	0	1	0	0	0	0	1	0	12600
0	0	1	0	167	1	120	43	358.1	588	1	0	1	0	0	0	0	0	1	0	0	0	0	1	0	6587
0	1	0	0	82	1	120	43	358.1	588	1	0	1	0	0	0	0	0	0	1	0	0	0	1	0	1385
0	1	0	0	271	2	130	42	434.5	882	1	0	1	0	0	0	1	0	0	0	0	0	0	0	1	600
0	0	1	0	243	1	130	65	1162	1433	1	0	1	0	0	0	0	0	1	0	0	0	0	1	0	8868
0	0	1	0	46	1	130	84.9	2382	2648	1	0	0	1	0	0	0	0	0	1	0	0	0	1	0	20900
0	0	1	0	143	2	120	46	664.9	1877	3	0	1	0	0	0	0	0	1	0	0	0	0	0	1	0
0	0	0	1	83	1	120	84.9	2382	2648	1	0	0	1	0	0	0	0	1	0	0	0	0	1	0	7700
1	0	0	0	39	1	130	42	376.9	588	1	0	1	0	0	0	0	0	1	0	0	0	0	1	0	3840
1	0	0	0	31	1	130	29	264.4	698	1	0	1	0	0	0	0	0	0	1	0	0	0	1	0	4665
1	0	0	0	40	1	130	64.8	996	1470	1	0	1	0	0	0	0	0	1	0	0	0	0	1	0	7900
0	1	0	0	332	1	120	60	940.5	1471	1	0	0	1	0	0	0	0	1	0	0	0	0	1	0	25600
0	0	1	0	226	1	130	33	299.1	1037	1	0	1	0	0	0	0	0	1	0	0	0	0	1	0	2575
0	0	1	0	266	1	120	38.3	360	588	1	0	1	0	0	0	0	0	1	0	0	0	0	1	0	6692
0	0	1	0	272	1	120	67.2	1089	1078	1	0	1	0	0	0	0	0	0	1	0	0	0	1	0	2215
0	0	1	0	137	1	130	58.2	813.6	1043	1	0	1	0	0	0	0	0	1	0	0	0	0	1	0	7838
0	0	1	0	300	1	134	29	264.4	698	1	0	1	0	0	0	0	0	0	1	0	0	0	1	0	2960
1	0	0	0	52	1	130	67	1493	1470	1	0	1	0	0	0	0	0	0	1	0	0	0	1	0	12400
0	1	0	0	114	1	120	54.2	1258	1470	1	0	1	0	0	0	0	0	1	0	0	0	0	1	0	4840
1	0	0	0	121	1	120	43	358.1	588	1	0	1	0	0	0	0	0	0	1	0	0	0	1	0	5544
0	0	1	0	282	1	140	52.8	491.4	1212	1	0	1	0	0	0	0	0	1	0	0	0	0	1	0	4257
0	1	0	0	182	1	140	60.3	896.7	883	1	0	0	1	1	0	0	0	0	0	1	0	0	0	0	760
1	0	0	0	275	1	140	37.7	415.7	882	1	0	1	0	0	0	0	0	1	0	0	0	0	1	0	1735
1	0	0	0	58	1	130	67	1493	1470	1	0	1	0	0	0	0	0	0	1	0	0	0	1	0	27978
0	1	0	0	295	1	135	60	993.4	1433	1	0	1	0	0	0	0	0	1	0	0	0	0	1	0	2952
0	0	1	0	195	1	130	80.3	1598	2207	1	0	0	1	0	0	0	0	1	0	0	0	0	1	0	16800
1	0	0	0	29	1	120	64.8	970.2	1341	1	0	1	0	0	0	0	0	1	0	0	0	0	1	0	4875
0	1	0	0	84	1	120	47.1	538.7	1300	1	0	1	0	0	0	0	0	0	1	0	0	0	1	0	7760
1	0	0	0	137	2	150	46	664.9	1877	1	0	1	0	0	0	0	0	0	1	0	0	0	0	1	3329
0	1	0	0	49	1	120	47	465.9	1065	1	0	1	0	0	0	0	0	1	0	0	0	0	1	0	4900
1	0	0	0	103	1	130	65	1162	1433	1	0	1	0	0	0	0	0	1	0	0	0	0	1	0	6192
0	1	0	0	53	1	120	84.9	2382	2648	1	0	0	1	0	0	0	0	1	0	0	0	0	1	0	21200
0	0	1	0	71	1	140	52.8	491.4	1212	1	0	1	0	0	0	0	0	1	0	0	0	0	1	0	2131
0	0	1	0	236	1	132	64.8	970.2	1341	1	0	1	0	0	0	0	0	0	1	0	0	0	1	0	8390
0	0	1	0	71	1	120	84.9	2382	2648	1	0	0	1	0	0	0	0	1	0	0	0	0	1	0	14100
0	0	1	0	59	1	120	64.8	970.2	1341	1	0	1	0	0	0	0	0	1	0	0	0	0	1	0	6800
1	0	0	0	138	1	120	47	465.9	1065	1	0	1	0	0	0	0	0	1	0	0	0	0	1	0	5700
1	0	0	0	226	1	140	37.7	415.7	882	1	0	1	0	0	0	0	0	1	0	0	0	0	1	0	1404
1	0	0	0	223	1	120	45	539.6	882	1	0	1	0	0	0	0	0	1	0	0	0	0	1	0	2441
0	1	0	0	295	1	140	60.3	896.7	883	1	0	0	1	1	0	0	0	0	0	1	0	0	0	0	3717
0	1	0	0	55	1	130	29	264.4	698	1	0	1	0	0	0	0	0	0	1	0	0	0	1	0	3780
1	0	0	0	131	1	120	50	620.1	1164	1	0	1	0	0	0	0	0	1	0	0	0	0	1	0	3595
0	1	0	0	254	1	140	61.2	916.3	478	1	0	0	1	1	0	0	0	0	0	1	0	0	0	0	640
0	0	0	1	93	1	120	84.9	2382	2648	1	0	0	1	0	0	0	0	1	0	0	0	0	1	0	5300
1	0	0	0	164	1	120	45	539.6	882	1	0	1	0	0	0	0	0	1	0	0	0	0	1	0	2468
0	1	0	0	158	2	120	46	664.9	1877	2	0	1	0	0	0	0	0	1	0	0	0	0	0	1	0
0	1	0	0	311	1	135	60	993.4	1433	1	0	1	0	0	0	0	0	1	0	0	0	0	1	0	2824
1	0	0	0	99	1	120	54.2	1258	1470	1	0	1	0	0	0	0	0	1	0	0	0	0	1	0	5082
0	0	1	0	248	1	130	65	1162	1433	1	0	1	0	0	0	0	0	1	0	0	0	0	1	0	8743
1	0	0	0	166	1	120	45	539.6	882	2	0	1	0	0	0	0	0	1	0	0	0	0	1	0	3356
0	1	0	0	64	1	120	64.8	970.2	1341	1	0	1	0	0	0	0	0	1	0	0	0	0	1	0	3010
0	0	1	0	113	1	120	39.5	372.5	735	1	0	1	0	0	0	0	0	1	0	0	0	0	1	0	2578
0	0	1	0	114	1	120	38.3	360	588	1	0	1	0	0	0	0	0	1	0	0	0	0	1	0	7516
0	0	1	0	113	1	120	39.1	320.4	771	1	0	1	0	0	0	0	0	0	1	0	0	0	1	0	7752
0	0	1	0	280	1	130	80.3	1513	2207	2	0	0	1	0	0	0	0	1	0	0	0	0	1	0	0
0	0	1	0	177	1	120	43	358.1	588	1	0	1	0	0	0	0	0	1	0	0	0	0	1	0	3269
0	0	1	0	144	1	120	37.2	388.2	588	1	0	1	0	0	0	0	0	0	1	0	0	0	1	0	9745
1	0	0	0	80	1	120	50	620.1	1164	1	0	1	0	0	0	0	0	1	0	0	0	0	1	0	3291
0	0	1	0	189	1	130	80.3	1598	2207	1	0	0	1	0	0	0	0	1	0	0	0	0	1	0	8000
1	0	0	0	165	1	120	47	465.9	1065	1	0	1	0	0	0	0	0	1	0	0	0	0	1	0	2571
0	1	0	0	233	1	130	53.6	924.3	919	1	0	0	1	0	0	0	0	0	1	0	0	0	1	0	10100
1	0	0	0	288	1	138	38.8	310.3	882	1	0	1	0	0	0	0	0	0	1	0	0	0	1	0	1850
0	0	1	0	172	2	120	46	666.5	1139	1	0	1	0	0	0	0	0	1	0	0	0	0	0	1	2000
1	0	0	0	60	1	125	63.5	1075	1189	1	0	1	0	0	0	0	0	0	1	0	0	0	1	0	16200
0	1	0	0	166	2	120	46	664.9	1877	1	0	1	0	0	0	0	0	1	0	0	0	0	0	1	11800
0	0	1	0	75	1	120	64.8	970.2	1341	1	0	1	0	0	0	0	0	1	0	0	0	0	1	0	5715
0	0	1	0	287	1	130	65	1162	1433	1	0	1	0	0	0	0	0	1	0	0	0	0	1	0	4504
1	0	0	0	77	1	120	29	264.4	698	1	0	1	0	0	0	0	0	1	0	0	0	0	1	0	2520
1	0	0	0	309	1	120	50	620.1	1164	1	0	1	0	0	0	0	0	1	0	0	0	0	1	0	4084
0	0	1	0	274	1	130	65	1162	1433	1	0	1	0	0	0	0	0	1	0	0	0	0	1	0	5088
0	0	1	0	212	1	120	39.1	320.4	771	3	0	1	0	0	0	0	0	1	0	0	0	0	1	0	0
0	0	1	0	66	1	130	38.8	310.3	882	1	0	1	0	0	0	0	0	1	0	0	0	0	1	0	4760
0	0	0	1	100	1	120	39.5	372.5	735	1	0	1	0	0	0	0	0	1	0	0	0	0	1	0	5442
1	0	0	0	158	1	120	54.2	1258	1470	1	0	1	0	0	0	0	0	1	0	0	0	0	1	0	7799
1	0	0	0	122	1	120	38.3	360	588	1	0	1	0	0	0	0	0	1	0	0	0	0	1	0	1435
0	1	0	0	114	2	120	45	742.6	1176	1	0	1	0	0	0	0	0	0	1	0	0	0	0	1	3376
0	0	1	0	181	1	125	56.6	705.6	1300	1	0	1	0	0	0	0	0	1	0	0	0	0	1	0	6992
1	0	0	0	235	1	140	37.7	415.7	882	1	0	1	0	0	0	0	0	1	0	0	0	0	1	0	5569
0	0	0	1	73	1	120	42.7	338.9	588	1	0	1	0	0	0	0	0	1	0	0	0	0	1	0	3348
0	1	0	0	16	1	130	42	376.9	588	1	0	1	0	0	0	0	0	1	0	0	0	0	1	0	6350
0	0	1	0	185	1	120	42	376.9	588	1	0	1	0	0	1	0	0	0	0	0	0	0	1	0	4280
0	0	0	1	116	1	130	53.6	924.3	919	1	0	0	1	0	0	0	0	0	1	0	0	0	1	0	3800
0	1	0	0	88	1	130	53.6	924.3	919	2	0	0	1	0	0	0	0	0	1	0	0	0	1	0	8800
1	0	0	0	79	1	125	63.5	1075	1189	1	0	1	0	0	0	0	0	0	1	0	0	0	1	0	7200
0	0	0	1	154	1	120	37.2	388.2	588	1	0	1	0	0	0	0	0	0	1	0	0	0	1	0	10200
1	0	0	0	72	1	120	54.2	1258	1470	1	0	1	0	0	0	0	0	1	0	0	0	0	1	0	3674
0	1	0	0	91	1	130	45	742.6	1176	1	0	1	0	0	0	0	0	1	0	0	0	0	1	0	1140
0	1	0	0	358	1	120	47	465.9	1065	1	0	1	0	0	0	0	0	1	0	0	0	0	1	0	3050
0	1	0	0	38	1	120	45	742.6	1176	1	0	1	0	0	0	0	0	1	0	0	0	0	1	0	5624
0	1	0	0	106	1	120	50	620.1	1164	1	0	1	0	0	0	0	0	1	0	0	0	0	1	0	4354
0	0	1	0	198	1	120	38.3	360	588	1	0	1	0	0	0	0	0	1	0	0	0	0	1	0	2011
0	0	1	0	95	1	135	80.3	1598	2207	1	0	0	1	0	0	0	0	1	0	0	0	0	1	0	1750
0	0	1	0	285	1	134	29	264.4	698	1	0	1	0	0	0	0	0	0	1	0	0	0	1	0	4040
1	0	0	0	125	1	120	54.2	1258	1470	1	0	1	0	0	0	0	0	1	0	0	0	0	1	0	8239
0	0	1	0	84	1	140	52.8	491.4	1212	1	0	1	0	0	0	0	0	1	0	0	0	0	1	0	14666
1	0	0	0	130	1	120	64.8	970.2	1341	1	0	1	0	0	0	0	0	0	1	0	0	0	1	0	4700
0	1	0	0	116	2	120	45	742.6	1176	1	0	1	0	0	0	0	0	0	1	0	0	0	0	1	2315
1	0	0	0	137	2	120	46	664.7	1877	1	0	1	0	0	0	1	0	0	0	0	0	0	1	0	1368
1	0	0	0	141	1	120	37.2	388.2	588	1	0	1	0	0	0	0	0	0	1	0	0	0	1	0	5250
1	0	0	0	41	1	130	64.8	970.2	1341	1	0	1	0	0	0	0	0	0	1	0	0	0	1	0	15200
1	0	0	0	96	1	120	47.1	538.7	1300	1	0	1	0	0	0	0	0	0	1	0	0	0	1	0	7890
0	1	0	0	95	1	130	45	742.6	1176	1	0	1	0	0	0	0	0	1	0	0	0	0	1	0	2740
1	0	0	0	313	1	120	50	620.1	1164	1	0	1	0	0	0	0	0	1	0	0	0	0	1	0	2777
0	0	1	0	177	2	120	46	666.5	1139	1	0	1	0	0	0	0	0	1	0	0	0	0	0	1	1000
0	0	1	0	309	1	120	39.5	372.5	735	1	0	1	0	0	0	0	0	1	0	0	0	0	1	0	4730
0	0	1	0	161	2	120	46	614	918	7	0	1	0	0	0	0	0	1	0	0	0	0	0	1	0
0	1	0	0	240	1	130	80.3	1598	2207	1	0	0	1	0	0	0	0	1	0	0	0	0	1	0	7950
0	1	0	0	150	2	125	43.1	494.5	845	2	0	1	0	0	0	0	1	0	0	0	0	0	0	1	8000
1	0	0	0	132	1	130	38.8	310.3	882	1	0	1	0	0	0	0	0	1	0	0	0	0	1	0	4513
0	0	1	0	112	1	120	38.3	360	588	1	0	1	0	0	0	0	0	1	0	0	0	0	1	0	3629
0	1	0	0	36	1	120	45	742.6	1176	1	0	1	0	0	0	0	0	1	0	0	0	0	1	0	8865
0	0	1	0	119	1	130	38.8	310.3	882	1	0	1	0	0	0	0	0	1	0	0	0	0	1	0	8542
0	1	0	0	341	1	120	60	940.5	1471	1	0	0	1	0	0	0	0	1	0	0	0	0	1	0	9300
1	0	1	0	222	1	120	39.5	372.5	735	1	0	1	0	0	0	0	0	1	0	0	0	0	1	0	2496
0	0	1	0	306	1	120	39.5	372.5	735	1	0	1	0	0	0	0	0	1	0	0	0	0	1	0	3130
0	1	0	0	86	1	120	47	465.9	1065	1	0	1	0	0	0	0	0	1	0	0	0	0	1	0	4700
0	1	0	0	28	2	125	46	664.9	1877	2	0	1	0	0	0	0	0	1	0	0	0	0	0	1	0
0	1	0	0	229	1	130	53.6	924.3	919	1	0	0	1	0	0	0	0	0	1	0	0	0	1	0	8700
0	0	1	0	196	1	130	65	1162	1433	3	0	1	0	0	0	0	0	1	0	0	0	0	1	0	164
1	0	0	0	51	1	130	64.8	1106	1470	1	0	1	0	0	0	0	0	0	1	0	0	0	1	0	18241
0	0	1	0	30	1	120	65	1162	1433	1	0	1	0	0	0	0	0	1	0	0	0	0	1	0	10911
0	0	1	0	174	1	120	43	358.1	588	1	0	1	0	0	0	0	0	1	0	0	0	0	1	0	4338
0	0	1	0	260	1	120	39.5	372.5	735	1	0	1	0	0	0	0	0	1	0	0	0	0	1	0	2348
1	0	0	0	130	2	130	46	664.9	1877	1	0	1	0	0	0	0	0	0	1	0	0	0	0	1	3249
1	0	0	0	72	1	120	38.3	360	588	1	0	1	0	0	0	0	0	1	0	0	0	0	1	0	994
0	1	0	0	25	1	120	42.7	338.9	588	1	0	1	0	0	0	0	0	1	0	0	0	0	1	0	3598
0	0	0	1	154	2	120	46	664.9	1877	1	0	1	0	0	0	0	0	1	0	0	0	0	0	1	717
0	0	1	0	206	1	125	56.6	705.6	1300	1	0	1	0	0	0	0	0	1	0	0	0	0	1	0	6105
0	0	0	1	101	1	130	53.6	924.3	919	1	0	0	1	0	0	0	0	0	1	0	0	0	1	0	12500
1	0	0	0	91	1	130	38.8	310.3	882	1	0	1	0	0	0	0	0	1	0	0	0	0	1	0	4386
0	1	0	0	241	1	130	53.6	924.3	919	1	0	0	1	0	0	0	0	0	1	0	0	0	1	0	15400
0	1	1	0	62	1	120	39.1	320.4	771	1	0	1	0	0	0	0	0	0	1	0	0	0	1	0	6480
0	1	0	0	301	2	130	42	434.5	882	1	0	1	0	0	0	1	0	0	0	0	0	0	0	1	3000
0	0	0	1	176	1	120	45	539.6	882	1	0	1	0	0	0	0	0	1	0	0	0	0	1	0	3523
0	0	1	0	188	1	120	38.3	360	588	1	0	1	0	0	0	0	0	1	0	0	0	0	1	0	2266
0	0	1	0	268	1	120	60	940.5	1471	1	0	0	1	0	0	0	0	1	0	0	0	0	1	0	1390
1	0	0	0	196	1	120	47	465.9	1065	1	0	1	0	0	0	0	0	1	0	0	0	0	1	0	4966
0	1	0	0	60	2	120	46	664.7	1877	1	0	1	0	0	0	0	0	1	0	0	0	0	0	1	2000
1	0	0	0	163	1	125	56.6	705.6	1300	1	0	1	0	0	0	0	0	1	0	0	0	0	1	0	5096
0	0	1	0	46	1	120	64.8	970.2	1341	1	0	1	0	0	0	0	0	1	0	0	0	0	1	0	9210
1	0	0	0	190	1	120	47	465.9	1065	1	0	1	0	0	0	0	0	1	0	0	0	0	1	0	2896
0	0	1	0	165	2	120	46	666.5	1139	2	0	1	0	0	0	0	0	1	0	0	0	0	0	1	200
0	0	1	0	174	1	120	33	299.1	1037	1	0	1	0	0	0	0	0	1	0	0	0	0	1	0	2440
0	1	0	0	209	1	130	80.3	1513	2207	1	0	0	1	0	0	0	0	1	0	0	0	0	1	0	16500
0	0	1	0	102	1	140	52.8	491.4	1212	1	0	1	0	0	0	0	0	1	0	0	0	0	1	0	6759
0	0	1	0	116	1	120	29	264.4	698	1	0	1	0	0	0	0	0	1	0	0	0	0	1	0	4690
1	0	0	0	125	2	120	46	664.7	1877	1	0	1	0	0	0	1	0	0	0	0	0	0	1	0	2386
0	0	0	1	109	1	130	53.6	924.3	919	1	0	0	1	0	0	0	0	1	0	0	0	0	1	0	12370
1	0	0	0	102	1	130	45	742.6	1176	1	0	1	0	0	0	0	0	1	0	0	0	0	1	0	2210
0	0	1	0	105	1	120	39.1	320.4	771	1	0	1	0	0	0	0	0	0	1	0	0	0	1	0	5058
1	0	0	0	57	1	120	45	742.6	1176	1	0	1	0	0	0	0	0	1	0	0	0	0	1	0	3024
0	0	1	0	290	1	120	60	940.5	1471	1	0	0	1	0	0	0	0	1	0	0	0	0	1	0	1440
1	0	0	0	38	1	130	64.8	996	1470	1	0	1	0	0	0	0	0	1	0	0	0	0	1	0	12220
0	1	0	0	90	2	120	46	664.9	1877	1	0	1	0	0	0	0	0	1	0	0	0	0	0	1	2130
1	0	0	0	24	1	120	50	620.1	1164	1	0	1	0	0	0	0	0	1	0	0	0	0	1	0	4897
0	0	1	0	191	1	120	43	358.1	588	1	0	1	0	0	0	0	0	1	0	0	0	0	1	0	5612
0	1	0	0	296	1	135	60	993.4	1433	1	0	1	0	0	0	0	0	1	0	0	0	0	1	0	4028
0	1	0	0	51	1	120	47	465.9	1065	1	0	1	0	0	0	0	0	1	0	0	0	0	1	0	4825
1	0	0	0	123	1	120	38.3	360	588	1	0	1	0	0	0	0	0	1	0	0	0	0	1	0	3164
1	0	0	0	246	1	138	38.8	310.3	882	1	0	1	0	0	0	0	0	0	1	0	0	0	1	0	2550
0	1	0	0	76	2	129	53	929.4	1470	1	0	1	0	0	0	0	0	0	1	0	0	0	0	1	5490
1	0	0	0	81	1	130	39.1	320.4	771	1	0	1	0	0	0	0	0	0	1	0	0	0	1	0	3822
0	0	1	0	281	1	130	65	1162	1433	1	0	1	0	0	0	0	0	1	0	0	0	0	1	0	6286
0	1	0	0	75	2	132	53	669.3	1470	1	0	1	0	0	0	0	0	0	1	0	0	0	0	1	4520
0	0	1	0	298	1	120	39.5	372.5	735	1	0	1	0	0	0	0	0	1	0	0	0	0	1	0	3852
0	0	1	0	59	1	130	84.9	2382	2648	1	0	0	1	0	0	0	0	0	1	0	0	0	1	0	20700
1	0	0	0	134	1	125	56.6	705.6	1300	1	0	1	0	0	0	0	0	0	1	0	0	0	1	0	3675
0	0	1	0	146	1	120	29	264.4	698	1	0	1	0	0	0	0	0	1	0	0	0	0	1	0	3695
0	1	0	0	182	1	120	29	252.3	588	2	0	0	1	1	0	0	0	0	0	1	0	0	0	0	0
0	1	0	0	255	1	130	64.6	811.5	1471	1	0	0	1	0	0	0	0	1	0	0	0	0	1	0	11550
0	0	1	0	180	2	120	46	664.9	1877	3	0	1	0	0	0	0	0	1	0	0	0	0	0	1	11400
1	0	0	0	20	1	130	65	1162	1433	1	0	1	0	0	0	0	0	1	0	0	0	0	1	0	6034
0	0	1	0	227	1	130	64.8	970.2	1341	1	0	1	0	0	0	0	0	1	0	0	0	0	1	0	9590
0	1	0	0	60	1	140	40.5	438.6	882	1	0	1	0	0	0	0	0	1	0	0	0	0	1	0	3225
1	0	0	0	125	1	120	37.2	388.2	588	1	0	1	0	0	0	0	0	0	1	0	0	0	1	0	2500
0	0	1	0	120	1	120	38.3	360	588	1	0	1	0	0	0	0	0	1	0	0	0	0	1	0	3319
1	0	0	0	76	1	140	40.5	438.6	882	1	0	1	0	0	0	0	0	1	0	0	0	0	1	0	2963
0	0	1	0	91	1	120	42.7	338.9	588	1	0	1	0	0	0	0	0	1	0	0	0	0	1	0	3618
0	1	0	0	215	1	130	53.6	924.3	919	1	0	0	1	0	0	0	0	0	1	0	0	0	1	0	13100
0	1	0	0	64	1	120	50	620.1	1164	1	0	1	0	0	0	0	0	1	0	0	0	0	1	0	3611
0	1	0	0	61	1	120	47	465.9	1065	1	0	1	0	0	0	0	0	1	0	0	0	0	1	0	3200
0	0	1	0	202	1	120	60	940.5	1471	1	0	0	1	0	0	0	0	1	0	0	0	0	1	0	5430
0	1	0	0	54	2	120	46	664.9	1877	2	0	1	0	0	0	0	0	1	0	0	0	0	0	1	2330
0	0	1	0	290	1	130	80.3	1598	2207	1	0	0	1	0	0	0	0	1	0	0	0	0	1	0	4100
1	0	0	0	57	1	130	45	742.6	1176	1	0	1	0	0	0	0	0	1	0	0	0	0	1	0	2330
1	0	0	0	64	1	130	67	1493	1470	1	0	1	0	0	0	0	0	0	1	0	0	0	1	0	16822
0	0	1	0	269	1	120	50	620.1	1164	1	0	1	0	0	0	0	0	1	0	0	0	0	1	0	2844
1	0	0	0	13	1	130	65	1162	1433	1	0	1	0	0	0	0	0	1	0	0	0	0	1	0	8217
0	0	1	0	239	1	120	84.9	2382	2648	1	0	0	1	0	0	0	0	1	0	0	0	0	1	0	4000
0	0	0	1	287	1	120	84.9	2382	2648	1	0	0	1	0	0	0	0	1	0	0	0	0	1	0	18200
0	0	1	0	251	1	120	39.1	320.4	771	1	0	1	0	0	0	0	0	1	0	0	0	0	1	0	4812
0	0	1	0	152	2	120	42	471	808	1	0	1	0	0	0	0	0	1	0	0	0	0	0	1	4615
1	0	0	0	200	1	120	45	539.6	882	1	0	1	0	0	0	0	0	1	0	0	0	0	1	0	1940
0	0	1	0	99	1	120	64.8	970.2	1341	1	0	1	0	0	0	0	0	1	0	0	0	0	1	0	7900
0	1	1	0	281	1	130	80.3	1513	2207	2	0	0	1	0	0	0	0	1	0	0	0	0	1	0	11215
0	0	1	0	245	1	120	39.1	320.4	771	1	0	1	0	0	0	0	0	1	0	0	0	0	1	0	2412
1	0	0	0	45	1	130	60	993.4	1433	1	0	1	0	0	0	0	0	0	1	0	0	0	1	0	12440
0	1	0	0	65	2	120	46	664.9	1877	1	0	1	0	0	0	0	0	1	0	0	0	0	0	1	1750
0	1	0	0	258	1	140	61.2	916.3	478	1	0	0	1	1	0	0	0	0	0	1	0	0	0	0	820
1	0	0	0	153	1	120	50	620.1	1164	1	0	1	0	0	0	0	0	1	0	0	0	0	1	0	2137
0	1	0	0	84	1	120	50	620.1	1164	1	0	1	0	0	0	0	0	1	0	0	0	0	1	0	3543
1	0	0	0	97	1	130	64.8	970.2	1341	1	0	1	0	0	0	0	0	0	1	0	0	0	1	0	8900
1	0	0	0	136	1	130	40.5	438.6	882	1	0	1	0	0	0	0	0	1	0	0	0	0	1	0	2040
0	0	1	0	261	1	132	64.8	970.2	1341	1	0	1	0	0	0	0	0	0	1	0	0	0	1	0	6180
1	0	0	0	108	1	130	64.8	970.2	1341	1	0	1	0	0	0	0	0	0	1	0	0	0	1	0	4600
1	0	0	0	129	2	130	46	664.9	1877	1	0	1	0	0	0	0	0	0	1	0	0	0	0	1	2736
0	1	0	0	232	2	130	42	434.5	882	1	0	1	0	0	0	1	0	0	0	0	0	0	0	1	500
0	1	0	0	278	1	130	64.6	811.5	1471	1	0	0	1	0	0	0	0	1	0	0	0	0	1	0	4130
0	0	1	0	122	2	120	46	664.7	1877	1	0	1	0	0	0	1	0	0	0	0	0	0	1	0	1570
0	0	0	1	139	1	130	71.1	1256	699	1	0	0	1	1	0	0	0	0	0	0	1	0	0	0	570
1	0	0	0	50	1	130	64.8	996	1470	1	0	1	0	0	0	0	0	1	0	0	0	0	1	0	4860
0	1	0	0	179	1	142	44.8	756	1103	1	1	0	0	0	0	0	0	1	0	0	0	0	1	0	3108
0	0	1	0	145	2	120	46	664.9	1877	3	0	1	0	0	0	0	0	1	0	0	0	0	0	1	8005
0	0	1	0	152	2	120	46	666.5	1139	1	0	1	0	0	0	0	0	1	0	0	0	0	0	1	3000
0	0	0	1	174	1	120	45	539.6	882	1	0	1	0	0	0	0	0	1	0	0	0	0	1	0	5057
0	0	1	0	200	1	120	60	940.5	1471	1	0	0	1	0	0	0	0	1	0	0	0	0	1	0	4950
0	1	0	0	29	1	120	37.2	388.2	588	1	0	1	0	0	0	0	0	0	1	0	0	0	1	0	2850
1	0	0	0	347	1	120	47	465.9	1065	1	0	1	0	0	0	0	0	1	0	0	0	0	1	0	3610
0	0	1	0	93	1	120	64.8	970.2	1341	1	0	1	0	0	0	0	0	1	0	0	0	0	1	0	6260
0	1	0	0	76	1	130	45	742.6	1176	2	0	1	0	0	0	0	0	1	0	0	0	0	1	0	0
0	1	0	0	297	1	140	60.3	896.7	883	1	0	0	1	1	0	0	0	0	0	1	0	0	0	0	5573
0	0	1	0	91	1	120	39.1	320.4	771	1	0	1	0	0	0	0	0	0	1	0	0	0	1	0	10980
1	0	0	0	20	1	130	60	993.4	1433	1	0	1	0	0	0	0	0	0	1	0	0	0	1	0	5292
0	1	0	0	84	1	120	47	465.9	1065	1	0	1	0	0	0	0	0	1	0	0	0	0	1	0	4900
1	0	0	0	49	1	120	54.2	1258	1470	1	0	1	0	0	0	0	0	1	0	0	0	0	1	0	16700
0	0	1	0	240	1	132	64.8	970.2	1341	1	0	1	0	0	0	0	0	0	1	0	0	0	1	0	8290
1	0	0	0	129	1	120	38.3	360	588	1	0	1	0	0	0	0	0	1	0	0	0	0	1	0	7532
0	0	1	0	122	2	120	46	664.7	1877	1	0	1	0	0	0	1	0	0	0	0	0	0	1	0	1050
0	1	0	0	170	2	120	46	664.7	1877	1	0	1	0	0	0	1	0	0	0	0	0	0	1	0	5200
1	0	0	0	70	1	130	67	1493	1470	1	0	1	0	0	0	0	0	0	1	0	0	0	1	0	3040
1	0	0	0	132	1	120	47.1	538.7	1300	1	0	1	0	0	0	0	0	0	1	0	0	0	1	0	7725
0	0	1	0	220	1	130	65	1162	1433	1	0	1	0	0	0	0	0	1	0	0	0	0	1	0	4684
0	0	1	0	137	1	120	38.3	360	588	1	0	1	0	0	0	0	0	1	0	0	0	0	1	0	14263
0	0	1	0	152	1	120	64.8	970.2	1341	1	0	1	0	0	0	0	0	0	1	0	0	0	1	0	6050
1	0	0	0	136	1	120	37.2	388.2	588	1	0	1	0	0	0	0	0	0	1	0	0	0	1	0	9925
0	0	0	1	163	1	120	37.2	388.2	588	1	0	1	0	0	0	0	0	0	1	0	0	0	1	0	10390
0	1	0	0	189	1	120	45	539.6	882	1	0	1	0	0	0	0	0	1	0	0	0	0	1	0	7034
0	0	1	0	302	1	134	29	264.4	698	1	0	1	0	0	0	0	0	0	1	0	0	0	1	0	3470
1	0	0	0	295	1	134	29	264.4	698	2	0	1	0	0	0	0	0	0	1	0	0	0	1	0	1520
0	1	0	0	88	1	120	47	465.9	1065	1	0	1	0	0	0	0	0	1	0	0	0	0	1	0	4850
0	0	1	0	240	1	120	58.2	813.6	1043	1	0	1	0	0	0	0	0	1	0	0	0	0	1	0	8080
0	0	1	0	91	1	130	53.6	924.3	919	1	0	0	1	0	0	0	0	1	0	0	0	0	1	0	760
0	0	1	0	247	1	132	64.8	970.2	1341	1	0	1	0	0	0	0	0	0	1	0	0	0	1	0	2830
0	0	1	0	184	1	120	33	299.1	1037	1	0	1	0	0	0	0	0	1	0	0	0	0	1	0	3462
0	0	1	0	258	1	120	58.2	813.6	1043	1	0	1	0	0	0	0	0	1	0	0	0	0	1	0	17040
0	1	0	0	242	2	130	42	434.5	882	5	0	1	0	0	0	1	0	0	0	0	0	0	0	1	700
0	0	1	0	296	1	138	38.8	310.3	882	1	0	1	0	0	0	0	0	0	1	0	0	0	1	0	1775
0	1	0	0	76	1	130	45	742.6	1176	1	0	1	0	0	0	0	0	1	0	0	0	0	1	0	1980
0	0	1	0	298	1	140	52.8	491.4	1212	1	0	1	0	0	0	0	0	1	0	0	0	0	1	0	4135
0	0	1	0	144	2	120	46	666.5	1139	1	0	1	0	0	0	0	0	0	1	0	0	0	0	1	2000
0	0	1	0	223	1	130	65	1162	1433	1	0	1	0	0	0	0	0	1	0	0	0	0	1	0	5994
0	0	0	1	63	1	136	39.5	372.5	735	1	0	1	0	0	0	0	0	1	0	0	0	0	1	0	3640
0	1	0	0	303	1	135	60	993.4	1433	1	0	1	0	0	0	0	0	1	0	0	0	0	1	0	3401
0	0	0	1	291	1	120	60	940.5	1471	1	0	0	1	0	0	0	0	1	0	0	0	0	1	0	54480
0	1	0	0	247	2	130	42	434.5	882	1	0	1	0	0	0	1	0	0	0	0	0	0	0	1	1100
0	0	1	0	288	2	130	42	434.5	882	1	0	1	0	0	0	1	0	0	0	0	0	0	0	1	800
1	0	0	0	91	1	130	42	376.9	588	1	0	1	0	0	0	0	0	1	0	0	0	1	0	0	3680
1	0	0	0	124	1	125	56.6	705.6	1300	1	0	1	0	0	0	0	0	0	1	0	0	0	1	0	4347
0	0	1	0	232	1	120	84.9	2382	2648	1	0	0	1	0	0	0	0	1	0	0	0	0	1	0	7700
0	0	1	0	126	1	135	80.3	1598	2207	2	0	0	1	0	0	0	0	1	0	0	0	0	1	0	0
0	1	0	0	165	2	120	46	664.9	1877	4	0	1	0	0	0	0	0	1	0	0	0	0	0	1	0
0	1	0	0	83	1	120	64.8	996	1470	1	0	1	0	0	0	0	0	1	0	0	0	0	1	0	3271
1	0	0	0	101	1	120	54.2	1258	1470	1	0	1	0	0	0	0	0	1	0	0	0	0	1	0	7821
0	0	1	0	148	1	120	39.1	320.4	771	1	0	1	0	0	0	0	0	0	1	0	0	0	1	0	7998
1	0	0	0	148	1	120	64.8	970.2	1341	1	0	1	0	0	0	0	0	0	1	0	0	0	1	0	3540
0	1	0	0	260	1	130	80.3	1513	2207	2	0	0	1	0	0	0	0	1	0	0	0	0	1	0	0
1	0	0	0	55	1	120	37.2	388.2	588	1	0	1	0	0	0	0	0	0	1	0	0	0	1	0	5970
0	0	1	0	224	1	120	39.5	372.5	735	1	0	1	0	0	0	0	0	1	0	0	0	0	1	0	3928
1	0	0	0	136	1	120	64.8	996	1470	1	0	1	0	0	0	0	0	1	0	0	0	0	1	0	5925
0	1	0	0	71	2	132	53	669.3	1470	2	0	1	0	0	0	0	0	0	1	0	0	0	0	1	0
1	1	0	0	1	1	130	60	993.4	1433	1	0	1	0	0	0	0	0	0	1	0	0	0	1	0	9994
0	0	1	0	237	1	120	42.7	338.9	588	1	0	1	0	0	0	0	0	0	1	0	0	0	1	0	3955
0	0	1	0	84	1	120	37.2	388.2	588	1	0	1	0	0	0	0	0	0	1	0	0	0	1	0	4210
0	0	1	0	297	1	134	38.3	360	588	1	0	1	0	0	0	0	0	0	1	0	0	0	1	0	2817
0	0	1	0	178	2	120	46	664.9	1877	2	0	1	0	0	0	0	0	1	0	0	0	0	0	1	0
0	0	1	0	105	1	120	39.5	372.5	735	1	0	1	0	0	0	0	0	1	0	0	0	0	1	0	3781
1	0	0	0	99	1	120	39.1	320.4	771	1	0	1	0	0	0	0	0	0	1	0	0	0	1	0	3942
0	0	1	0	115	1	130	53.6	924.3	919	2	0	0	1	0	0	0	0	1	0	0	0	0	1	0	2630
0	0	0	1	118	1	135	80.3	1598	2207	1	0	0	1	0	0	0	0	1	0	0	0	0	1	0	6050
0	1	0	0	176	2	120	46	664.9	1877	1	0	1	0	0	0	0	0	1	0	0	0	0	0	1	5300
0	1	0	0	144	1	135	42	471	808	1	0	1	0	0	0	0	1	0	0	0	0	0	0	1	2392
0	0	1	0	192	1	125	56.6	705.6	1300	1	0	1	0	0	0	0	0	1	0	0	0	0	1	0	5435
1	0	0	0	203	1	120	47	465.9	1065	1	0	1	0	0	0	0	0	1	0	0	0	0	1	0	2669
0	0	1	0	321	1	120	60	940.5	1471	1	0	0	1	0	0	0	0	1	0	0	0	0	1	0	960
0	0	1	0	284	1	120	38.3	360	588	1	0	1	0	0	0	0	0	1	0	0	0	0	1	0	2925
0	0	1	0	89	1	130	84.9	2382	2648	1	0	0	1	0	0	0	0	0	1	0	0	0	1	0	8200
0	1	0	0	249	2	130	42	434.5	882	1	0	1	0	0	0	1	0	0	0	0	0	0	0	1	400
0	1	0	0	237	1	130	64.6	811.5	1471	1	0	0	1	0	0	0	0	1	0	0	0	0	1	0	15360
0	0	1	0	145	1	120	38.3	360	588	1	0	1	0	0	0	0	0	1	0	0	0	0	1	0	6349
0	0	1	0	214	1	120	39.1	320.4	771	3	0	1	0	0	0	0	0	1	0	0	0	0	1	0	4068
0	0	1	0	193	1	130	80.3	1598	2207	1	0	0	1	0	0	0	0	1	0	0	0	0	1	0	6100
0	1	0	0	104	1	130	40.5	438.6	882	1	0	1	0	0	0	0	0	1	0	0	0	0	1	0	2960
0	0	1	0	96	1	120	38.3	360	588	1	0	1	0	0	0	0	0	1	0	0	0	0	1	0	2037
1	0	0	0	48	1	130	64.8	970.2	1341	1	0	1	0	0	0	0	0	0	1	0	0	0	1	0	19120
0	1	0	0	354	1	120	47	465.9	1065	1	0	1	0	0	0	0	0	1	0	0	0	0	1	0	200
0	1	0	0	179	1	140	61.2	916.3	478	1	0	0	1	1	0	0	0	0	0	1	0	0	0	0	5570
0	0	1	0	89	2	125	46	664.9	1877	1	0	1	0	0	0	0	0	1	0	0	0	0	0	1	240
1	0	0	0	20	1	130	64.8	1106	1470	1	0	1	0	0	0	0	0	0	1	0	0	0	1	0	3820
0	0	1	0	266	1	130	65	1162	1433	1	0	1	0	0	0	0	0	1	0	0	0	0	1	0	5491
1	0	0	0	235	1	120	39.5	372.5	735	1	0	1	0	0	0	0	0	1	0	0	0	0	1	0	2656
0	1	0	0	296	1	110	29	252.3	588	1	0	0	1	1	0	0	0	0	0	0	1	0	0	0	5000
0	0	0	1	161	1	130	71.1	1256	699	1	0	0	1	1	0	0	0	0	0	0	1	0	0	0	5700
1	0	0	0	66	1	130	64.8	970.2	1341	1	0	1	0	0	0	0	0	0	1	0	0	0	1	0	9160
0	0	1	0	67	1	130	84.9	2382	2648	1	0	0	1	0	0	0	0	0	1	0	0	0	1	0	6000
0	0	1	0	223	1	120	39.5	372.5	735	1	0	1	0	0	0	0	0	1	0	0	0	0	1	0	2420
0	1	0	0	149	1	140	61.2	916.3	478	2	0	0	1	1	0	0	0	0	0	1	0	0	0	0	0
0	1	0	0	55	1	140	40.5	438.6	882	1	0	1	0	0	0	0	0	1	0	0	0	0	1	0	2775
0	1	0	0	284	1	130	64.6	811.5	1471	1	0	0	1	0	0	0	0	1	0	0	0	0	1	0	12660
0	0	1	0	43	1	120	42.7	338.9	588	1	0	1	0	0	0	0	0	1	0	0	0	0	1	0	6884
1	0	0	0	238	1	140	37.7	415.7	882	1	0	1	0	0	0	0	0	1	0	0	0	0	1	0	4544
0	0	1	0	197	1	120	43	358.1	588	1	0	1	0	0	0	0	0	1	0	0	0	0	1	0	5516
0	0	1	0	191	1	125	56.6	705.6	1300	1	0	1	0	0	0	0	0	1	0	0	0	0	1	0	6562
1	0	0	0	76	1	120	54.2	1258	1470	1	0	1	0	0	0	0	0	1	0	0	0	0	1	0	4378
0	0	1	0	121	2	120	46	664.7	1877	1	0	1	0	0	0	1	0	0	0	0	0	0	1	0	1950
1	0	0	0	43	1	130	38.8	310.3	882	1	0	1	0	0	0	0	0	1	0	0	0	0	1	0	3132
1	0	0	0	99	1	120	38.3	360	588	1	0	1	0	0	0	0	0	1	0	0	0	0	1	0	4288
0	0	1	0	84	1	120	39.5	372.5	735	1	0	1	0	0	0	0	0	1	0	0	0	0	1	0	9450
0	0	1	0	307	1	134	38.3	360	588	1	0	1	0	0	0	0	0	0	1	0	0	0	1	0	2377
0	0	1	0	326	1	134	38.3	360	588	1	0	1	0	0	0	0	0	0	1	0	0	0	1	0	2915
1	0	0	0	309	1	138	38.8	310.3	882	1	0	1	0	0	0	0	0	0	1	0	0	0	1	0	2000
1	0	0	0	62	1	130	60	993.4	1433	1	0	1	0	0	0	0	0	0	1	0	0	0	1	0	17816
1	0	0	0	94	1	120	39.5	372.5	735	1	0	1	0	0	0	0	0	1	0	0	0	0	1	0	5453
0	0	1	0	297	1	134	29	264.4	698	1	0	1	0	0	0	0	0	0	1	0	0	0	1	0	2550
1	0	0	0	236	1	120	45	539.6	882	1	0	1	0	0	0	0	0	1	0	0	0	0	1	0	2736
0	0	1	0	250	1	120	64.8	1106	1470	1	0	1	0	0	0	0	0	1	0	0	0	0	1	0	4509
1	0	0	0	34	1	125	63.5	1075	1189	1	0	1	0	0	0	0	0	0	1	0	0	0	1	0	15785
0	0	1	0	197	1	130	80.3	1598	2207	1	0	0	1	0	0	0	0	1	0	0	0	0	1	0	7850
0	1	0	0	252	1	130	80.3	1513	2207	1	0	0	1	0	0	0	0	1	0	0	0	0	1	0	10075
1	0	0	0	307	1	120	50	620.1	1164	1	0	1	0	0	0	0	0	1	0	0	0	0	1	0	3850
1	0	0	0	135	1	120	29	264.4	698	1	0	1	0	0	0	0	0	1	0	0	0	0	1	0	982
0	1	0	0	50	2	130	46	664.9	1877	1	0	1	0	0	0	0	0	1	0	0	0	0	0	1	7200
1	0	0	0	76	2	130	46	664.9	1877	1	0	1	0	0	0	0	0	1	0	0	0	0	0	1	4500
0	1	0	0	185	2	120	46	664.9	1877	1	0	1	0	0	0	0	0	1	0	0	0	0	0	1	1250
1	0	0	0	127	1	120	47.1	538.7	1300	1	0	1	0	0	0	0	0	0	1	0	0	0	1	0	7125
0	1	0	0	171	2	120	46	664.9	1877	1	0	1	0	0	0	0	0	1	0	0	0	0	0	1	3200
1	0	0	0	138	2	120	46	664.7	1877	1	0	1	0	0	0	1	0	0	0	0	0	0	1	0	1644
0	0	1	0	267	1	130	80.3	1598	2207	1	0	0	1	0	0	0	0	1	0	0	0	0	1	0	7550
0	1	0	0	159	2	120	46	664.9	1877	2	0	1	0	0	0	0	0	1	0	0	0	0	0	1	3408
1	0	0	0	47	1	130	39.1	320.4	771	1	0	1	0	0	0	0	0	0	1	0	0	0	1	0	5100
0	1	0	0	226	1	130	53.6	924.3	919	1	0	0	1	0	0	0	0	0	1	0	0	0	1	0	7700
0	0	1	0	224	1	120	84.9	2382	2648	1	0	0	1	0	0	0	0	1	0	0	0	0	1	0	6600
0	0	1	0	164	2	120	42	471	808	1	0	1	0	0	0	0	0	1	0	0	0	0	0	1	1521
1	0	0	0	160	1	125	56.6	705.6	1300	1	0	1	0	0	0	0	0	1	0	0	0	0	1	0	2995
0	0	1	0	185	1	130	80.3	1598	2207	1	0	0	1	0	0	0	0	1	0	0	0	0	1	0	18950
0	1	0	0	82	2	120	46	664.9	1877	1	0	1	0	0	0	0	0	1	0	0	0	0	0	1	1000
1	0	0	0	271	1	120	50	620.1	1164	1	0	1	0	0	0	0	0	1	0	0	0	0	1	0	3471
0	0	1	0	244	1	120	58.2	813.6	1043	1	0	1	0	0	0	0	0	1	0	0	0	0	1	0	9672
0	0	1	0	305	1	134	38.3	360	588	1	0	1	0	0	0	0	0	0	1	0	0	0	1	0	3197
0	1	0	0	55	2	132	53	669.3	1470	1	0	1	0	0	0	0	0	0	1	0	0	0	0	1	104
1	0	0	0	264	1	130	50	620.1	1164	1	0	1	0	0	0	0	0	0	1	0	0	0	1	0	2907
0	0	1	0	216	1	120	60	940.5	1471	1	0	0	1	0	0	0	0	1	0	0	0	0	1	0	9940
0	0	1	0	144	2	120	46	664.7	1877	2	0	1	0	0	0	1	0	0	0	0	0	0	1	0	0
1	0	0	0	102	1	120	38.3	360	588	1	0	1	0	0	0	0	0	1	0	0	0	0	1	0	4424
0	0	1	0	267	1	120	38.3	360	588	1	0	1	0	0	0	0	0	1	0	0	0	0	1	0	4844
0	0	1	0	212	1	125	56.6	705.6	1300	1	0	1	0	0	0	0	0	1	0	0	0	0	1	0	4234
1	0	0	0	38	1	130	58.2	813.6	1043	1	0	1	0	0	0	0	0	0	1	0	0	0	1	0	7170
0	1	0	0	213	1	130	80.3	1513	2207	1	0	0	1	0	0	0	0	1	0	0	0	0	1	0	13480
1	0	0	0	134	1	120	39.1	320.4	771	1	0	1	0	0	0	0	0	0	1	0	0	0	1	0	3276
1	0	0	0	246	1	120	39.5	372.5	735	1	0	1	0	0	0	0	0	1	0	0	0	0	1	0	2580
1	0	0	0	183	1	120	45	539.6	882	2	0	1	0	0	0	0	0	1	0	0	0	0	1	0	991
1	0	0	0	272	1	138	38.8	310.3	882	1	0	1	0	0	0	0	0	0	1	0	0	0	1	0	2475
0	0	1	0	222	1	120	38.8	310.3	882	1	0	1	0	0	0	0	0	1	0	0	0	0	1	0	3075
0	1	1	0	100	1	120	42.7	338.9	588	1	0	1	0	0	0	0	0	1	0	0	0	0	1	0	1755
0	0	1	0	205	1	130	80.3	1598	2207	1	0	0	1	0	0	0	0	1	0	0	0	0	1	0	9550
0	0	1	0	270	1	130	64.6	811.5	1471	1	0	0	1	0	0	0	0	1	0	0	0	0	1	0	6910
0	1	0	0	263	1	120	43.5	365.3	735	1	0	1	0	0	0	0	0	1	0	0	0	0	1	0	2676
0	0	1	0	71	1	136	39.5	372.5	735	1	0	1	0	0	0	0	0	1	0	0	0	0	1	0	4848
0	0	1	0	249	1	120	39.5	372.5	735	1	0	1	0	0	0	0	0	1	0	0	0	0	1	0	2521
1	0	0	0	136	2	120	45	742.6	1176	1	0	1	0	0	0	0	0	0	1	0	0	0	0	1	5016
0	1	0	0	281	1	135	60	993.4	1433	1	0	1	0	0	0	0	0	1	0	0	0	0	1	0	2625
0	0	1	0	208	1	120	60	940.5	1471	1	0	0	1	0	0	0	0	1	0	0	0	0	1	0	1610
0	0	1	0	200	1	125	56.6	705.6	1300	1	0	1	0	0	0	0	0	1	0	0	0	0	1	0	9125
0	1	0	0	96	2	120	46	664.9	1877	1	0	1	0	0	0	0	0	1	0	0	0	0	0	1	5740
1	0	0	0	37	1	125	63.5	1075	1189	1	0	1	0	0	0	0	0	0	1	0	0	0	1	0	6700
1	0	0	0	82	1	125	63.5	1075	1189	1	0	1	0	0	0	0	0	0	1	0	0	0	1	0	3580
1	0	0	0	245	1	140	37.7	415.7	882	1	0	1	0	0	0	0	0	1	0	0	0	0	1	0	4102
0	0	1	0	232	1	120	58.2	813.6	1043	1	0	1	0	0	0	0	0	1	0	0	0	0	1	0	6365
0	0	1	0	224	1	130	65	1162	1433	1	0	1	0	0	0	0	0	1	0	0	0	0	1	0	5650
0	0	1	0	287	1	134	29	264.4	698	1	0	1	0	0	0	0	0	0	1	0	0	0	1	0	3310
0	0	1	0	238	1	130	65	1162	1433	1	0	1	0	0	0	0	0	1	0	0	0	0	1	0	6706
0	0	0	1	148	2	120	46	664.9	1877	1	0	1	0	0	0	0	0	1	0	0	0	0	0	1	5976
0	0	1	0	120	1	120	39.1	320.4	771	1	0	1	0	0	0	0	0	0	1	0	0	0	1	0	4962
1	0	0	0	44	1	130	29	264.4	698	1	0	1	0	0	0	0	0	0	1	0	0	0	1	0	2885
1	0	0	0	145	1	120	47	465.9	1065	2	0	1	0	0	0	0	0	0	1	0	0	0	1	0	0
1	0	0	0	255	1	138	38.8	310.3	882	1	0	1	0	0	0	0	0	0	1	0	0	0	1	0	2850
0	1	0	0	66	1	140	40.5	438.6	882	1	0	1	0	0	0	0	0	1	0	0	0	0	1	0	3042
0	0	0	1	127	1	130	71.1	1256	699	1	0	0	1	1	0	0	0	0	0	0	1	0	0	0	1825
1	0	0	0	83	1	120	29	264.4	698	1	0	1	0	0	0	0	0	1	0	0	0	0	1	0	2280
1	0	0	0	76	1	130	64.8	996	1470	1	0	1	0	0	0	0	0	1	0	0	0	0	1	0	5471
0	0	1	0	74	1	130	84.9	2382	2648	1	0	0	1	0	0	0	0	0	1	0	0	0	1	0	2300
1	0	0	0	134	2	120	45	742.6	1176	1	0	1	0	0	0	0	0	0	1	0	0	0	0	1	3852
0	1	0	0	161	2	120	46	666.5	1139	1	0	1	0	0	0	0	0	1	0	0	0	0	0	1	2000
0	1	0	0	120	1	120	54.2	1258	1470	1	0	1	0	0	0	0	0	1	0	0	0	0	1	0	6182
0	1	0	0	103	1	120	50	620.1	1164	1	0	1	0	0	0	0	0	1	0	0	0	0	1	0	3458
0	0	1	0	70	1	130	84.9	2382	2648	1	0	0	1	0	0	0	0	0	1	0	0	0	1	0	8300
0	0	0	1	76	1	130	53.6	924.3	919	1	0	0	1	0	0	0	0	0	1	0	0	0	1	0	6000
0	1	1	0	67	1	120	64.8	970.2	1341	1	0	1	0	0	0	0	0	1	0	0	0	0	1	0	1230
0	1	0	0	287	1	110	29	252.3	588	1	0	0	1	1	0	0	0	0	0	0	1	0	0	0	4200
0	1	0	0	112	2	120	45	742.6	1176	1	0	1	0	0	0	0	0	0	1	0	0	0	0	1	3651
0	0	1	0	183	1	120	42	376.9	588	1	0	1	0	0	1	0	0	0	0	0	0	0	1	0	5306
1	0	0	0	123	1	120	37.2	388.2	588	1	0	1	0	0	0	0	0	0	1	0	0	0	1	0	4150
0	0	1	0	141	1	120	38.3	360	588	1	0	1	0	0	0	0	0	1	0	0	0	0	1	0	9927
0	0	0	1	99	1	120	42.7	338.9	588	1	0	1	0	0	0	0	0	1	0	0	0	0	1	0	4387
0	0	1	0	268	1	120	58.2	813.6	1043	1	0	1	0	0	0	0	0	1	0	0	0	0	1	0	6060
1	0	0	0	139	1	120	54.2	1258	1470	1	0	1	0	0	0	0	0	1	0	0	0	0	1	0	4906
0	0	1	0	63	1	130	42	376.9	588	1	0	1	0	0	0	0	0	1	0	0	0	0	1	0	3265
0	0	1	0	193	1	120	43	358.1	588	1	0	1	0	0	0	0	0	1	0	0	0	0	1	0	5824
0	1	0	0	233	2	130	42	434.5	882	1	0	1	0	0	0	1	0	0	0	0	0	0	0	1	600
0	0	1	0	228	1	130	64.8	970.2	1341	1	0	1	0	0	0	0	0	1	0	0	0	0	1	0	9237
0	1	0	0	27	1	130	42	376.9	588	1	0	1	0	0	0	0	0	1	0	0	0	0	1	0	3040
1	0	0	0	140	1	130	63.5	1075	1189	1	0	1	0	0	0	0	0	1	0	0	0	0	1	0	10200
1	0	0	0	125	1	120	64.8	970.2	1341	1	0	1	0	0	0	0	0	0	1	0	0	0	1	0	5530
1	0	0	0	88	1	130	40.5	438.6	882	1	0	1	0	0	0	0	0	1	0	0	0	0	1	0	3590
1	0	0	0	89	1	130	42	376.9	588	1	0	1	0	0	0	0	0	1	0	0	0	1	0	0	4320
0	0	1	0	111	1	120	38.3	360	588	1	0	1	0	0	0	0	0	1	0	0	0	0	1	0	8757
1	0	0	0	143	2	120	46	664.7	1877	1	0	1	0	0	0	1	0	0	0	0	0	0	1	0	3880
0	0	1	0	225	1	120	39.5	372.5	735	1	0	1	0	0	0	0	0	1	0	0	0	0	1	0	2042
1	0	0	0	98	1	120	47.1	538.7	1300	1	0	1	0	0	0	0	0	0	1	0	0	0	1	0	7425
1	0	0	0	268	1	120	43	358.1	588	1	0	1	0	0	0	0	0	1	0	0	0	0	1	0	307
0	1	0	0	202	1	142	44.8	756	1103	1	1	0	0	0	0	0	0	1	0	0	0	0	1	0	2477
1	0	0	0	133	1	120	29	264.4	698	1	0	1	0	0	0	0	0	1	0	0	0	0	1	0	4145
1	0	0	0	161	1	120	45	539.6	882	1	0	1	0	0	0	0	0	1	0	0	0	0	1	0	3430
1	0	0	0	18	1	120	47	465.9	1065	1	0	1	0	0	0	0	0	1	0	0	0	0	1	0	4200
1	0	0	0	346	1	120	47	465.9	1065	1	0	1	0	0	0	0	0	1	0	0	0	0	1	0	3600
0	1	0	0	233	1	130	80.3	1513	2207	1	0	0	1	0	0	0	0	1	0	0	0	0	1	0	12045
0	0	1	0	82	1	120	37.2	388.2	588	2	0	1	0	0	0	0	0	0	1	0	0	0	1	0	2000
0	0	1	0	149	2	120	43.1	494.5	845	1	0	1	0	0	0	0	0	1	0	0	0	0	0	1	2700
0	0	1	0	31	1	120	65	1162	1433	1	0	1	0	0	0	0	0	1	0	0	0	0	1	0	6448
0	0	1	0	108	1	120	39.5	372.5	735	1	0	1	0	0	0	0	0	1	0	0	0	0	1	0	5270
0	0	1	0	278	1	120	84.9	2382	2648	1	0	0	1	0	0	0	0	1	0	0	0	0	1	0	7500
1	0	0	0	115	1	125	56.6	705.6	1300	1	0	1	0	0	0	0	0	0	1	0	0	0	1	0	5634
1	0	0	0	348	1	120	47	465.9	1065	1	0	1	0	0	0	0	0	1	0	0	0	0	1	0	4350
0	0	1	0	254	1	120	64.8	1106	1470	1	0	1	0	0	0	0	0	1	0	0	0	0	1	0	3153
0	0	1	0	134	1	120	43	358.1	588	1	0	1	0	0	0	0	0	1	0	0	0	0	1	0	7645
1	0	0	0	65	1	125	63.5	1075	1189	1	0	1	0	0	0	0	0	0	1	0	0	0	1	0	14400
1	0	0	0	63	1	120	50	620.1	1164	1	0	1	0	0	0	0	0	1	0	0	0	0	1	0	3797
1	0	0	0	30	1	130	42	376.9	588	1	0	1	0	0	0	0	0	0	1	0	0	0	1	0	3840
0	1	0	0	50	1	120	47	465.9	1065	1	0	1	0	0	0	0	0	1	0	0	0	0	1	0	4925
0	0	1	0	223	1	130	64.8	970.2	1341	1	0	1	0	0	0	0	0	1	0	0	0	0	1	0	11080
1	0	0	0	123	1	120	39.1	320.4	771	1	0	1	0	0	0	0	0	0	1	0	0	0	1	0	5610
0	0	1	0	48	1	120	65	1162	1433	1	0	1	0	0	0	0	0	1	0	0	0	0	1	0	8373
1	0	0	0	85	1	130	64.8	996	1470	1	0	1	0	0	0	0	0	1	0	0	0	0	1	0	948
0	1	0	0	68	1	130	64.8	996	1470	1	0	1	0	0	0	0	0	1	0	0	0	0	1	0	5098
0	0	1	0	92	1	120	39.1	320.4	771	1	0	1	0	0	0	0	0	0	1	0	0	0	1	0	14586
1	0	0	0	133	1	130	38.8	310.3	882	1	0	1	0	0	0	0	0	1	0	0	0	0	1	0	4590
0	0	0	1	65	1	136	39.5	372.5	735	1	0	1	0	0	0	0	0	1	0	0	0	0	1	0	2787
0	0	1	0	267	1	120	42.7	338.9	588	1	0	1	0	0	0	0	0	0	1	0	0	0	1	0	3221
0	1	0	0	166	1	120	50	620.1	1164	1	0	1	0	0	0	0	0	1	0	0	0	0	1	0	2066
0	1	0	0	218	1	130	80.3	1513	2207	1	0	0	1	0	0	0	0	1	0	0	0	0	1	0	18760
0	0	1	0	188	1	120	64.8	996	1470	1	0	1	0	0	0	0	0	1	0	0	0	0	1	0	6480
1	0	0	0	55	1	130	58.2	813.6	1043	1	0	1	0	0	0	0	0	0	1	0	0	0	1	0	19616
1	0	0	0	95	1	120	64.8	996	1470	1	0	1	0	0	0	0	0	1	0	0	0	0	1	0	3790
1	0	0	0	31	1	120	37.2	388.2	588	1	0	1	0	0	0	0	0	0	1	0	0	0	1	0	3700
0	0	1	0	258	1	120	42.7	338.9	588	1	0	1	0	0	0	0	0	0	1	0	0	0	1	0	3452
0	0	1	0	275	1	120	39.5	372.5	735	8	0	1	0	0	0	0	0	1	0	0	0	0	1	0	0
1	0	0	0	92	1	130	38.8	310.3	882	1	0	1	0	0	0	0	0	1	0	0	0	0	1	0	3825
0	0	1	0	76	1	130	38.8	310.3	882	1	0	1	0	0	0	0	0	1	0	0	0	0	1	0	7228
1	0	0	0	81	1	120	64.8	970.2	1341	1	0	1	0	0	0	0	0	1	0	0	0	0	1	0	7855
1	0	0	0	107	1	125	63.5	1075	1189	1	0	1	0	0	0	0	0	0	1	0	0	0	1	0	7360
0	0	0	1	159	1	120	37.2	388.2	588	1	0	1	0	0	0	0	0	0	1	0	0	0	1	0	2200
1	0	0	0	58	1	130	58.2	813.6	1043	1	0	1	0	0	0	0	0	0	1	0	0	0	1	0	19802
0	1	0	0	225	1	130	53.6	924.3	919	1	0	0	1	0	0	0	0	0	1	0	0	0	1	0	6100
1	0	0	0	274	1	120	67.2	1089	1078	1	0	1	0	0	0	0	0	0	1	0	0	0	1	0	5987
1	0	0	0	123	2	130	53	669.3	1470	1	0	1	0	0	0	0	0	0	1	0	0	0	0	1	3810
0	1	0	0	327	1	120	60	940.5	1471	6	0	0	1	0	0	0	0	1	0	0	0	0	1	0	0
0	1	0	0	127	2	120	42	471	808	2	0	1	0	0	0	0	0	1	0	0	0	0	0	1	150
0	1	0	0	164	2	120	46	664.7	1877	1	0	1	0	0	0	1	0	0	0	0	0	0	1	0	7300
0	0	1	0	155	1	120	29	264.4	698	1	0	1	0	0	0	0	0	1	0	0	0	0	1	0	4557
1	0	0	0	50	1	130	39.1	320.4	771	1	0	1	0	0	0	0	0	0	1	0	0	0	1	0	4434
1	0	0	0	66	1	125	63.5	1075	1189	1	0	1	0	0	0	0	0	0	1	0	0	0	1	0	22400
1	0	0	0	89	1	130	38.8	310.3	882	1	0	1	0	0	0	0	0	1	0	0	0	0	1	0	4794
1	0	0	0	37	1	140	40.5	438.6	882	1	0	1	0	0	0	0	0	1	0	0	0	0	1	0	2234
0	0	1	0	243	1	120	84.9	2382	2648	1	0	0	1	0	0	0	0	1	0	0	0	0	1	0	1400
1	0	0	0	75	1	120	54.2	1258	1470	1	0	1	0	0	0	0	0	1	0	0	0	0	1	0	4587
0	0	1	0	37	1	130	84.9	2382	2648	1	0	0	1	0	0	0	0	0	1	0	0	0	1	0	45500
0	0	1	0	245	1	120	42.7	338.9	588	1	0	1	0	0	0	0	0	0	1	0	0	0	1	0	3701
0	0	1	0	52	1	120	42.7	338.9	588	1	0	1	0	0	0	0	0	1	0	0	0	0	1	0	4697
1	0	0	0	48	1	130	58.2	813.6	1043	1	0	1	0	0	0	0	0	0	1	0	0	0	1	0	19931
0	0	1	0	92	1	120	29	264.4	698	1	0	1	0	0	0	0	0	1	0	0	0	0	1	0	6967
0	0	1	0	29	1	120	42.7	338.9	588	1	0	1	0	0	0	0	0	1	0	0	0	0	1	0	8712
1	0	0	0	141	1	120	54.2	1258	1470	1	0	1	0	0	0	0	0	1	0	0	0	0	1	0	9889
0	1	0	0	191	1	142	44.8	756	1103	1	1	0	0	0	0	0	0	1	0	0	0	0	1	0	3918
0	0	1	0	214	1	125	56.6	705.6	1300	1	0	1	0	0	0	0	0	1	0	0	0	0	1	0	6260
0	1	0	0	28	2	130	46	664.9	1877	2	0	1	0	0	0	0	0	1	0	0	0	0	0	1	0
0	0	1	0	290	1	134	38.3	360	588	1	0	1	0	0	0	0	0	0	1	0	0	0	1	0	3109
0	0	1	0	246	1	120	60	940.5	1471	1	0	0	1	0	0	0	0	1	0	0	0	0	1	0	4030
1	0	0	0	46	1	130	67	1493	1470	1	0	1	0	0	0	0	0	0	1	0	0	0	1	0	8610
1	0	0	0	47	1	130	67	1493	1470	1	0	1	0	0	0	0	0	0	1	0	0	0	1	0	13131
1	0	0	0	126	1	130	38.8	310.3	882	1	0	1	0	0	0	0	0	1	0	0	0	0	1	0	4105
0	0	1	0	264	1	120	60	940.5	1471	1	0	0	1	0	0	0	0	1	0	0	0	0	1	0	2230
1	0	0	0	188	1	120	47	465.9	1065	1	0	1	0	0	0	0	0	1	0	0	0	0	1	0	2812
0	0	1	0	56	1	120	64.8	970.2	1341	1	0	1	0	0	0	0	0	1	0	0	0	0	1	0	8950
0	1	0	0	141	2	120	42	471	808	2	0	1	0	0	0	0	0	1	0	0	0	0	0	1	0
0	1	0	0	120	2	125	43.1	494.5	845	2	0	1	0	0	0	0	1	0	0	0	0	0	0	1	0
1	0	0	0	273	1	120	67.2	1089	1078	1	0	1	0	0	0	0	0	0	1	0	0	0	1	0	3101
0	1	0	0	127	1	120	43	358.1	588	1	0	1	0	0	0	0	0	0	1	0	0	0	1	0	3556
0	0	1	0	150	2	120	46	664.9	1877	1	0	1	0	0	0	0	0	1	0	0	0	0	0	1	13422
1	0	0	0	220	1	120	45	539.6	882	1	0	1	0	0	0	0	0	1	0	0	0	0	1	0	3039
0	1	0	0	197	1	142	44.8	756	1103	1	1	0	0	0	0	0	0	1	0	0	0	0	1	0	2921
1	0	0	0	236	1	140	37.7	415.7	882	1	0	1	0	0	0	0	0	1	0	0	0	0	1	0	6064
1	0	0	0	101	1	130	58.2	813.6	1043	1	0	1	0	0	0	0	0	1	0	0	0	0	1	0	9897
1	0	0	0	24	1	120	42.7	338.9	588	1	0	1	0	0	0	0	0	0	1	0	0	0	1	0	5393
1	0	0	0	45	1	125	63.5	1075	1189	1	0	1	0	0	0	0	0	0	1	0	0	0	1	0	15200
1	0	0	0	200	1	140	37.7	415.7	882	1	0	1	0	0	0	0	0	1	0	0	0	0	1	0	1638
0	0	1	0	271	1	140	52.8	491.4	1212	1	0	1	0	0	0	0	0	1	0	0	0	0	1	0	5882
0	0	1	0	153	2	120	42	471	808	1	0	1	0	0	0	0	0	1	0	0	0	0	0	1	3975
0	1	0	0	168	1	140	60.3	896.7	883	1	0	0	1	1	0	0	0	0	0	1	0	0	0	0	2245
0	0	1	0	259	1	130	65	1162	1433	1	0	1	0	0	0	0	0	1	0	0	0	0	1	0	10136
1	0	0	0	54	1	120	42.7	338.9	588	1	0	1	0	0	0	0	0	0	1	0	0	0	1	0	5070
0	1	0	0	96	1	130	65	1162	1433	1	0	1	0	0	0	0	0	1	0	0	0	0	1	0	3120
1	0	0	0	144	1	120	47	465.9	1065	1	0	1	0	0	0	0	0	0	1	0	0	0	1	0	4781
0	0	1	0	190	1	130	80.3	1598	2207	1	0	0	1	0	0	0	0	1	0	0	0	0	1	0	12250
0	1	0	0	306	1	110	29	252.3	588	1	0	0	1	1	0	0	0	0	0	0	1	0	0	0	3200
1	0	0	0	28	1	120	64.8	970.2	1341	1	0	1	0	0	0	0	0	1	0	0	0	0	1	0	7555
1	0	0	0	13	1	130	60	993.4	1433	1	0	1	0	0	0	0	0	0	1	0	0	0	1	0	5845
1	0	0	0	91	1	130	64.8	970.2	1341	1	0	1	0	0	0	0	0	0	1	0	0	0	1	0	1900
0	1	0	0	133	2	125	43.1	494.5	845	1	0	1	0	0	0	0	1	0	0	0	0	0	0	1	21400
0	0	1	0	275	1	120	60	940.5	1471	1	0	0	1	0	0	0	0	1	0	0	0	0	1	0	4760
0	1	0	0	128	2	120	42	471	808	2	0	1	0	0	0	0	0	1	0	0	0	0	0	1	0
0	0	1	0	292	1	140	52.8	491.4	1212	1	0	1	0	0	0	0	0	1	0	0	0	0	1	0	4090
1	0	0	0	159	1	120	64.8	996	1470	1	0	1	0	0	0	0	0	1	0	0	0	0	1	0	5466
1	0	0	0	77	1	130	67	1493	1470	1	0	1	0	0	0	0	0	0	1	0	0	0	1	0	6480
0	0	1	0	279	1	120	38.3	360	588	1	0	1	0	0	0	0	0	1	0	0	0	0	1	0	2473
0	1	0	0	69	2	120	46	664.9	1877	1	0	1	0	0	0	0	0	1	0	0	0	0	0	1	2020
0	0	1	0	304	1	120	84.9	2382	2648	1	0	0	1	0	0	0	0	1	0	0	0	0	1	0	13100
0	1	0	0	78	1	130	45	742.6	1176	1	0	1	0	0	0	0	0	1	0	0	0	0	1	0	4160
0	1	0	0	340	1	120	60	940.5	1471	1	0	0	1	0	0	0	0	1	0	0	0	0	1	0	15160
1	0	0	0	143	1	120	45	539.6	882	1	0	1	0	0	0	0	0	1	0	0	0	0	1	0	3080
1	0	0	0	36	1	130	60	993.4	1433	1	0	1	0	0	0	0	0	0	1	0	0	0	1	0	3083
0	0	1	0	302	1	120	60	940.5	1471	1	0	0	1	0	0	0	0	1	0	0	0	0	1	0	1350
0	1	0	0	115	1	120	54.2	1258	1470	1	0	1	0	0	0	0	0	1	0	0	0	0	1	0	5720
0	1	0	0	86	1	120	47.1	538.7	1300	1	0	1	0	0	0	0	0	0	1	0	0	0	1	0	6160
0	0	1	0	294	1	120	84.9	2382	2648	2	0	0	1	0	0	0	0	1	0	0	0	0	1	0	0
0	1	0	0	125	1	140	61.2	916.3	478	1	0	0	1	1	0	0	0	0	0	1	0	0	0	0	1350
1	0	0	0	138	1	120	37.2	388.2	588	1	0	1	0	0	0	0	0	0	1	0	0	0	1	0	7825
0	1	0	0	66	1	120	64.8	970.2	1341	2	0	1	0	0	0	0	0	1	0	0	0	0	1	0	5255
0	0	0	1	107	1	130	53.6	924.3	919	1	0	0	1	0	0	0	0	1	0	0	0	0	1	0	8840
1	0	0	0	27	1	130	64.8	996	1470	1	0	1	0	0	0	0	0	1	0	0	0	0	1	0	4434
1	0	0	0	292	1	140	37.7	415.7	882	1	0	1	0	0	0	0	0	1	0	0	0	0	1	0	2771
1	0	0	0	30	1	120	37.2	388.2	588	1	0	1	0	0	0	0	0	0	1	0	0	0	1	0	4200
0	0	1	0	289	2	130	42	434.5	882	1	0	1	0	0	0	1	0	0	0	0	0	0	0	1	1400
0	0	1	0	152	2	120	46	614	918	9	0	1	0	0	0	0	0	1	0	0	0	0	0	1	0
1	0	0	0	75	1	120	50	620.1	1164	1	0	1	0	0	0	0	0	1	0	0	0	0	1	0	7884
1	0	0	0	80	1	120	64.8	970.2	1341	1	0	1	0	0	0	0	0	1	0	0	0	0	1	0	6095
0	0	1	0	251	1	120	58.2	813.6	1043	1	0	1	0	0	0	0	0	1	0	0	0	0	1	0	19240
0	0	1	0	325	1	120	39.5	372.5	735	1	0	1	0	0	0	0	0	1	0	0	0	0	1	0	3818
1	0	0	0	212	1	120	38.8	310.3	882	1	0	1	0	0	0	0	0	1	0	0	0	0	1	0	3490
0	1	0	0	62	1	130	64.8	996	1470	1	0	1	0	0	0	0	0	1	0	0	0	0	1	0	5338
1	0	0	0	360	1	120	47	465.9	1065	1	0	1	0	0	0	0	0	1	0	0	0	0	1	0	3120
1	0	0	0	60	1	130	42	376.9	588	1	0	1	0	0	0	0	0	0	1	0	0	0	1	0	5070
0	0	1	0	286	2	130	42	434.5	882	2	0	1	0	0	0	1	0	0	0	0	0	0	0	1	0
1	0	0	0	86	1	130	64.8	996	1470	1	0	1	0	0	0	0	0	1	0	0	0	0	1	0	4503
0	0	1	0	289	1	134	29	264.4	698	1	0	1	0	0	0	0	0	0	1	0	0	0	1	0	3468
0	1	0	0	194	1	120	45	539.6	882	1	0	1	0	0	0	0	0	1	0	0	0	0	1	0	2909
0	0	0	1	72	1	120	42.7	338.9	588	1	0	1	0	0	0	0	0	1	0	0	0	0	1	0	3850
1	0	0	0	320	1	120	50	620.1	1164	1	0	1	0	0	0	0	0	1	0	0	0	0	1	0	3380
0	1	0	0	38	2	125	46	664.9	1877	1	0	1	0	0	0	0	0	1	0	0	0	0	0	1	900
0	0	1	0	225	1	130	64.8	970.2	1341	1	0	1	0	0	0	0	0	1	0	0	0	0	1	0	10490
0	1	0	0	286	1	140	61.2	916.3	478	1	0	0	1	1	0	0	0	0	0	1	0	0	0	0	855
0	1	0	0	54	1	130	29	264.4	698	1	0	1	0	0	0	0	0	0	1	0	0	0	1	0	3925
1	0	0	0	88	1	130	64.8	970.2	1341	1	0	1	0	0	0	0	0	0	1	0	0	0	1	0	1940
0	1	0	0	212	1	130	80.3	1513	2207	1	0	0	1	0	0	0	0	1	0	0	0	0	1	0	18000
0	0	1	0	223	1	120	39.1	320.4	771	1	0	1	0	0	0	0	0	1	0	0	0	0	1	0	3540
0	0	1	0	320	1	120	39.5	372.5	735	1	0	1	0	0	0	0	0	1	0	0	0	0	1	0	1968
0	1	0	0	133	1	125	56.6	705.6	1300	1	0	1	0	0	0	0	0	0	1	0	0	0	1	0	6329
1	0	0	0	283	1	138	38.8	310.3	882	1	0	1	0	0	0	0	0	0	1	0	0	0	1	0	2300
0	1	0	0	239	1	130	80.3	1598	2207	1	0	0	1	0	0	0	0	1	0	0	0	0	1	0	7250
0	1	0	0	167	2	120	46	664.9	1877	1	0	1	0	0	0	0	0	1	0	0	0	0	0	1	1900
1	0	0	0	109	1	120	37.2	388.2	588	1	0	1	0	0	0	0	0	0	1	0	0	0	1	0	6450
0	1	0	0	291	1	140	61.2	916.3	478	1	0	0	1	1	0	0	0	0	0	1	0	0	0	0	725
0	1	0	0	25	1	120	47	465.9	1065	1	0	1	0	0	0	0	0	1	0	0	0	0	1	0	4400
1	0	0	0	84	1	130	38.8	310.3	882	1	0	1	0	0	0	0	0	1	0	0	0	0	1	0	5100
1	0	0	0	109	2	120	45	742.6	1176	1	0	1	0	0	0	0	0	0	1	0	0	0	0	1	1312
0	0	1	0	221	1	125	56.6	705.6	1300	1	0	1	0	0	0	0	0	1	0	0	0	0	1	0	4356
0	0	1	0	33	1	130	67	1493	1470	1	0	1	0	0	0	0	0	0	1	0	0	0	1	0	13095
0	0	1	0	80	1	130	65	1162	1433	1	0	1	0	0	0	0	0	1	0	0	0	0	1	0	5699
1	0	0	0	134	1	130	40.5	438.6	882	1	0	1	0	0	0	0	0	1	0	0	0	0	1	0	3440
1	0	0	0	87	1	120	29	264.4	698	1	0	1	0	0	0	0	0	1	0	0	0	0	1	0	6375
0	1	0	0	122	1	140	61.2	916.3	478	1	0	0	1	1	0	0	0	0	0	1	0	0	0	0	4690
1	0	0	0	101	1	120	38.3	360	588	1	0	1	0	0	0	0	0	1	0	0	0	0	1	0	1757
1	0	0	0	93	1	120	64.8	996	1470	1	0	1	0	0	0	0	0	1	0	0	0	0	1	0	3460
0	0	1	0	6	1	130	65	1162	1433	1	0	1	0	0	0	0	0	1	0	0	0	0	1	0	6709
0	1	0	0	34	1	120	47	465.9	1065	1	0	1	0	0	0	0	0	1	0	0	0	0	1	0	3150
0	1	0	0	97	1	120	50	620.1	1164	1	0	1	0	0	0	0	0	1	0	0	0	0	1	0	1677
1	0	0	0	36	1	140	40.5	438.6	882	1	0	1	0	0	0	0	0	1	0	0	0	0	1	0	3003
1	0	0	0	185	1	120	47	465.9	1065	1	0	1	0	0	0	0	0	1	0	0	0	0	1	0	2731
0	0	1	0	233	1	120	60	940.5	1471	1	0	0	1	0	0	0	0	1	0	0	0	0	1	0	3660
0	1	0	0	163	1	140	61.2	916.3	478	1	0	0	1	1	0	0	0	0	0	1	0	0	0	0	2820
1	0	0	0	50	1	130	64.8	1106	1470	1	0	1	0	0	0	0	0	0	1	0	0	0	1	0	16599
0	1	0	0	73	1	130	64.8	996	1470	1	0	1	0	0	0	0	0	1	0	0	0	0	1	0	699
1	0	0	0	119	1	130	58.2	813.6	1043	1	0	1	0	0	0	0	0	1	0	0	0	0	1	0	5128
0	1	0	0	24	1	130	42	376.9	588	1	0	1	0	0	0	0	0	1	0	0	0	0	1	0	1120
0	0	1	0	202	1	120	43	358.1	588	1	0	1	0	0	0	0	0	1	0	0	0	0	1	0	5446
0	0	1	0	266	1	130	80.3	1598	2207	1	0	0	1	0	0	0	0	1	0	0	0	0	1	0	2850
0	0	1	0	328	1	134	38.3	360	588	1	0	1	0	0	0	0	0	0	1	0	0	0	1	0	3337
1	0	0	0	135	2	120	46	664.7	1877	3	0	1	0	0	0	1	0	0	0	0	0	0	1	0	2594
0	1	0	0	254	1	120	84.9	2382	2648	1	0	0	1	0	0	0	0	1	0	0	0	0	1	0	10200
1	0	0	0	73	1	120	29	264.4	698	1	0	1	0	0	0	0	0	1	0	0	0	0	1	0	4200
0	0	1	0	239	1	132	64.8	970.2	1341	1	0	1	0	0	0	0	0	0	1	0	0	0	1	0	9980
0	0	1	0	88	1	120	64.8	970.2	1341	1	0	1	0	0	0	0	0	1	0	0	0	0	1	0	7865
0	1	0	0	175	2	120	46	664.9	1877	1	0	1	0	0	0	0	0	1	0	0	0	0	0	1	1824
0	1	0	0	54	2	125	46	664.9	1877	1	0	1	0	0	0	0	0	1	0	0	0	0	0	1	1000
0	1	0	0	53	1	120	42.7	338.9	588	1	0	1	0	0	0	0	0	0	1	0	0	0	1	0	3594
1	0	0	0	220	1	120	47	465.9	1065	1	0	1	0	0	0	0	0	1	0	0	0	0	1	0	4378
1	0	0	0	61	1	130	64.8	1106	1470	1	0	1	0	0	0	0	0	0	1	0	0	0	1	0	13152
1	0	0	0	98	1	130	58.2	813.6	1043	1	0	1	0	0	0	0	0	1	0	0	0	0	1	0	4832
1	0	0	0	315	1	120	50	620.1	1164	1	0	1	0	0	0	0	0	1	0	0	0	0	1	0	3391
1	0	0	0	92	2	125	46	664.9	1877	1	0	1	0	0	0	0	0	1	0	0	0	0	0	1	1800
1	0	0	0	62	1	125	63.5	1075	1189	1	0	1	0	0	0	0	0	0	1	0	0	0	1	0	16000
1	0	0	0	135	2	150	46	664.9	1877	1	0	1	0	0	0	0	0	0	1	0	0	0	0	1	1756
0	1	0	0	147	1	140	61.2	916.3	478	1	0	0	1	1	0	0	0	0	0	1	0	0	0	0	570
0	1	0	0	39	2	125	46	664.9	1877	3	0	1	0	0	0	0	0	1	0	0	0	0	0	1	0
0	1	0	0	65	1	140	40.5	438.6	882	1	0	1	0	0	0	0	0	1	0	0	0	0	1	0	2662
0	0	0	1	173	1	120	45	539.6	882	1	0	1	0	0	0	0	0	1	0	0	0	0	1	0	4264
0	0	1	0	267	1	120	58.2	813.6	1043	1	0	1	0	0	0	0	0	1	0	0	0	0	1	0	6020
1	0	0	0	132	2	120	45	742.6	1176	1	0	1	0	0	0	0	0	0	1	0	0	0	0	1	2526
1	0	0	0	125	1	130	38.8	310.3	882	1	0	1	0	0	0	0	0	1	0	0	0	0	1	0	5431
1	0	0	0	77	1	140	40.5	438.6	882	1	0	1	0	0	0	0	0	1	0	0	0	0	1	0	3638
0	0	0	1	76	1	136	39.5	372.5	735	1	0	1	0	0	0	0	0	1	0	0	0	0	1	0	3462
1	0	0	0	37	1	130	67	1493	1470	1	0	1	0	0	0	0	0	0	1	0	0	0	1	0	16825
0	0	1	0	12	1	120	37.2	388.2	588	1	0	1	0	0	0	1	0	0	0	0	0	0	1	0	100
0	1	0	0	117	1	120	54.2	1258	1470	1	0	1	0	0	0	0	0	1	0	0	0	0	1	0	6468
0	1	0	0	98	2	125	46	664.9	1877	1	0	1	0	0	0	0	0	1	0	0	0	0	0	1	2460
0	0	1	0	219	1	120	64.8	1106	1470	7	0	1	0	0	0	0	0	1	0	0	0	0	1	0	0
0	0	1	0	57	1	120	64.8	970.2	1341	1	0	1	0	0	0	0	0	1	0	0	0	0	1	0	8560
0	0	1	0	286	1	140	52.8	491.4	1212	1	0	1	0	0	0	0	0	1	0	0	0	0	1	0	3000
0	1	0	0	158	1	140	61.2	916.3	478	1	0	0	1	1	0	0	0	0	0	1	0	0	0	0	3590
0	0	1	0	274	1	120	60	940.5	1471	1	0	0	1	0	0	0	0	1	0	0	0	0	1	0	5870
0	1	0	0	82	2	129	53	929.4	1470	1	0	1	0	0	0	0	0	0	1	0	0	0	0	1	8875
0	1	0	0	91	1	130	53.6	924.3	919	1	0	0	1	0	0	0	0	0	1	0	0	0	1	0	3600
0	0	1	0	247	1	120	58.2	813.6	1043	1	0	1	0	0	0	0	0	1	0	0	0	0	1	0	2021
0	0	0	1	113	2	120	53	929.4	1470	1	0	1	0	0	0	0	0	0	1	0	0	0	0	1	1136
0	0	1	0	222	1	140	37.7	415.7	882	1	0	1	0	0	0	0	0	1	0	0	0	0	1	0	2906
0	0	1	0	35	1	130	67	1493	1470	1	0	1	0	0	0	0	0	0	1	0	0	0	1	0	16148
0	1	0	0	22	1	130	42	376.9	588	1	0	1	0	0	0	0	0	1	0	0	0	0	1	0	1600
0	0	1	0	266	1	140	52.8	491.4	1212	1	0	1	0	0	0	0	0	1	0	0	0	0	1	0	5981
0	0	1	0	261	1	120	39.5	372.5	735	1	0	1	0	0	0	0	0	1	0	0	0	0	1	0	2420
0	0	1	0	157	2	120	43.1	494.5	845	1	0	1	0	0	0	0	0	1	0	0	0	0	0	1	540
0	1	0	0	116	1	120	64.8	996	1470	1	0	1	0	0	0	0	0	1	0	0	0	0	1	0	4195
0	1	0	0	5	1	130	60	993.4	1433	1	0	1	0	0	0	0	0	0	1	0	0	0	1	0	5813
0	0	1	0	76	1	120	64.8	970.2	1341	1	0	1	0	0	0	0	0	1	0	0	0	0	1	0	7025
1	0	0	0	168	1	120	45	539.6	882	1	0	1	0	0	0	0	0	1	0	0	0	0	1	0	1128
0	0	1	0	273	1	134	29	264.4	698	1	0	1	0	0	0	0	0	0	1	0	0	0	1	0	3000
0	0	1	0	156	2	120	46	664.9	1877	1	0	1	0	0	0	0	0	1	0	0	0	0	0	1	9033
1	0	0	0	110	1	120	29	264.4	698	1	0	1	0	0	0	0	0	1	0	0	0	0	1	0	2480
1	0	0	0	308	1	120	50	620.1	1164	1	0	1	0	0	0	0	0	1	0	0	0	0	1	0	3466
1	0	0	0	128	2	120	46	664.7	1877	1	0	1	0	0	0	1	0	0	0	0	0	0	1	0	1138
1	0	0	0	49	1	120	42.7	338.9	588	1	0	1	0	0	0	0	0	0	1	0	0	0	1	0	3449
0	1	0	0	236	2	130	42	434.5	882	1	0	1	0	0	0	1	0	0	0	0	0	0	0	1	1000
1	0	0	0	4	1	120	47	465.9	1065	1	0	1	0	0	0	0	0	1	0	0	0	0	1	0	5600
1	0	0	0	295	1	120	50	620.1	1164	2	0	1	0	0	0	0	0	1	0	0	0	0	1	0	4046
0	1	0	0	124	2	120	46	614	918	1	0	1	0	0	0	1	0	0	0	0	0	0	0	1	300
0	1	0	0	62	1	130	29	264.4	698	1	0	1	0	0	0	0	0	0	1	0	0	0	1	0	3150
0	0	1	0	85	1	120	64.8	970.2	1341	1	0	1	0	0	0	0	0	1	0	0	0	0	1	0	7550
0	0	0	1	157	2	120	46	664.7	1877	1	0	1	0	0	0	1	0	0	0	0	0	0	1	0	5150
0	1	0	0	264	1	120	43.5	365.3	735	1	0	1	0	0	0	0	0	1	0	0	0	0	1	0	1848
0	0	1	0	52	1	130	38.8	310.3	882	1	0	1	0	0	0	0	0	1	0	0	0	0	1	0	5405
0	0	1	0	7	1	130	65	1162	1433	1	0	1	0	0	0	0	0	1	0	0	0	0	1	0	4831
0	0	1	0	203	1	120	64.8	1106	1470	1	0	1	0	0	0	0	0	1	0	0	0	0	1	0	3026
1	0	0	0	78	1	120	50	620.1	1164	1	0	1	0	0	0	0	0	1	0	0	0	0	1	0	2391
0	0	1	0	179	1	120	29	264.4	698	1	0	1	0	0	0	0	0	1	0	0	0	0	1	0	4707
1	0	0	0	132	1	120	64.8	970.2	1341	1	0	1	0	0	0	0	0	0	1	0	0	0	1	0	9900
0	1	0	0	60	1	130	45	742.6	1176	1	0	1	0	0	0	0	0	1	0	0	0	0	1	0	2350
0	0	0	1	78	1	120	84.9	2382	2648	1	0	0	1	0	0	0	0	1	0	0	0	0	1	0	23700
0	0	1	0	91	1	120	64.8	970.2	1341	1	0	1	0	0	0	0	0	1	0	0	0	0	1	0	13735
0	1	0	0	116	1	140	61.2	916.3	478	2	0	0	1	1	0	0	0	0	0	1	0	0	0	0	0
1	0	0	0	95	1	130	38.8	310.3	882	1	0	1	0	0	0	0	0	1	0	0	0	0	1	0	3366
0	0	1	0	253	2	130	42	434.5	882	3	0	1	0	0	0	1	0	0	0	0	0	0	0	1	0
1	0	0	0	20	1	120	42.7	338.9	588	1	0	1	0	0	0	0	0	1	0	0	0	0	1	0	2664
1	0	0	0	230	1	138	38.8	310.3	882	1	0	1	0	0	0	0	0	0	1	0	0	0	1	0	2175
1	0	0	0	329	1	138	38.8	310.3	882	1	0	1	0	0	0	0	0	0	1	0	0	0	1	0	650
0	1	0	0	247	1	130	64.6	811.5	1471	1	0	0	1	0	0	0	0	1	0	0	0	0	1	0	9840
1	0	0	0	123	1	120	64.8	970.2	1341	1	0	1	0	0	0	0	0	0	1	0	0	0	1	0	7800
0	1	0	0	140	2	125	43.1	494.5	845	1	0	1	0	0	0	0	1	0	0	0	0	0	0	1	20940
1	0	1	0	202	1	130	33	299.1	1037	1	0	1	0	0	0	0	0	1	0	0	0	0	1	0	5137
0	0	1	0	154	1	120	64.8	970.2	1341	1	0	1	0	0	0	0	0	0	1	0	0	0	1	0	5900
1	0	0	0	268	1	120	43.5	365.3	735	1	0	1	0	0	0	0	0	1	0	0	0	0	1	0	1404
0	1	0	0	83	2	125	46	664.9	1877	1	0	1	0	0	0	0	0	1	0	0	0	0	0	1	9000
0	0	1	0	155	2	120	46	666.5	1139	1	0	1	0	0	0	0	0	1	0	0	0	0	0	1	6000
0	1	0	0	54	2	129	53	929.4	1470	3	0	1	0	0	0	0	0	0	1	0	0	0	0	1	0
0	0	1	0	312	1	120	39.5	372.5	735	1	0	1	0	0	0	0	0	1	0	0	0	0	1	0	3180
1	0	0	0	45	1	130	58.2	813.6	1043	1	0	1	0	0	0	0	0	0	1	0	0	0	1	0	25840
1	0	0	0	90	1	140	52.8	491.4	1212	1	0	1	0	0	0	0	0	1	0	0	0	0	1	0	4914
0	1	0	0	113	2	120	45	742.6	1176	1	0	1	0	0	0	0	0	0	1	0	0	0	0	1	3596
0	0	1	0	178	2	120	46	664.9	1877	4	0	1	0	0	0	0	0	1	0	0	0	0	0	1	0
0	1	0	0	125	2	125	43.1	494.5	845	1	0	1	0	0	0	0	1	0	0	0	0	0	0	1	400
1	0	0	0	109	1	120	64.8	970.2	1341	1	0	1	0	0	0	0	0	0	1	0	0	0	1	0	6860
0	0	1	0	47	1	130	42	376.9	588	2	0	1	0	0	0	0	0	1	0	0	0	0	1	0	0
0	1	0	0	230	1	130	53.6	924.3	919	2	0	0	1	0	0	0	0	0	1	0	0	0	1	0	0
1	0	0	0	97	1	125	63.5	1075	1189	1	0	1	0	0	0	0	0	0	1	0	0	0	1	0	9180
1	0	0	0	56	1	130	64.8	1106	1470	1	0	1	0	0	0	0	0	0	1	0	0	0	1	0	10950
0	1	0	0	104	1	120	50	620.1	1164	1	0	1	0	0	0	0	0	1	0	0	0	0	1	0	2820
1	0	0	0	49	1	120	50	620.1	1164	1	0	1	0	0	0	0	0	1	0	0	0	0	1	0	3100
0	0	1	0	300	1	134	38.3	360	588	1	0	1	0	0	0	0	0	0	1	0	0	0	1	0	2231
0	0	1	0	269	1	120	58.2	813.6	1043	1	0	1	0	0	0	0	0	1	0	0	0	0	1	0	7172
0	0	1	0	272	1	120	39.5	372.5	735	8	0	1	0	0	0	0	0	1	0	0	0	0	1	0	0
0	0	1	0	251	1	130	64.6	811.5	1471	1	0	0	1	0	0	0	0	1	0	0	0	0	1	0	10680
0	1	0	0	140	1	120	45	539.6	882	1	0	1	0	0	0	0	0	1	0	0	0	0	1	0	321
0	1	0	0	164	1	120	50	620.1	1164	1	0	1	0	0	0	0	0	1	0	0	0	0	1	0	2952
0	0	1	0	178	1	120	43	358.1	588	1	0	1	0	0	0	0	0	1	0	0	0	0	1	0	4002
1	0	0	0	49	1	130	42	376.9	588	1	0	1	0	0	0	0	0	0	1	0	0	0	1	0	6240
1	0	0	0	243	1	120	45	539.6	882	1	0	1	0	0	0	0	0	1	0	0	0	0	1	0	964
0	0	1	0	154	1	120	42	376.9	588	1	0	1	0	0	1	0	0	0	0	0	0	0	1	0	4744
0	0	1	0	130	1	120	38.3	360	588	1	0	1	0	0	0	0	0	1	0	0	0	0	1	0	7183
0	1	0	0	63	2	120	46	664.9	1877	1	0	1	0	0	0	0	0	1	0	0	0	0	0	1	2038
1	0	0	0	1	1	130	64.8	996	1470	1	0	1	0	0	0	0	0	1	0	0	0	0	1	0	4671
0	1	0	0	51	1	120	84.9	2382	2648	1	0	0	1	0	0	0	0	1	0	0	0	0	1	0	40200
1	0	0	0	42	1	120	65	1162	1433	1	0	1	0	0	0	0	0	1	0	0	0	0	1	0	13612
0	0	1	0	139	1	135	80.3	1598	2207	1	0	0	1	0	0	0	0	1	0	0	0	0	1	0	9550
1	0	0	0	7	1	130	60	993.4	1433	1	0	1	0	0	0	0	0	0	1	0	0	0	1	0	8312
1	0	0	0	29	1	130	42	376.9	588	1	0	1	0	0	0	0	0	0	1	0	0	0	1	0	3400
0	1	0	0	59	2	120	46	664.7	1877	1	0	1	0	0	0	0	0	1	0	0	0	0	0	1	4148
0	0	1	0	200	1	120	38.3	360	588	1	0	1	0	0	0	0	0	1	0	0	0	0	1	0	2401
0	1	0	0	69	1	150	29	252.3	588	1	0	0	1	1	0	0	0	0	0	0	1	0	0	0	2100
0	0	1	0	36	1	130	84.9	2382	2648	1	0	0	1	0	0	0	0	0	1	0	0	0	1	0	36100
1	0	0	0	84	1	120	29	264.4	698	1	0	1	0	0	0	0	0	1	0	0	0	0	1	0	3582
0	0	1	0	153	1	120	29	264.4	698	1	0	1	0	0	0	0	0	1	0	0	0	0	1	0	4077
1	0	0	0	39	1	120	37.2	388.2	588	1	0	1	0	0	0	0	0	0	1	0	0	0	1	0	4975
0	0	1	0	264	1	140	52.8	491.4	1212	1	0	1	0	0	0	0	0	1	0	0	0	0	1	0	3585
0	1	0	0	295	1	130	64.6	811.5	1471	1	0	0	1	0	0	0	0	1	0	0	0	0	1	0	28630
0	0	1	0	136	1	130	63.5	1075	1189	1	0	1	0	0	0	0	0	1	0	0	0	0	1	0	6040
1	0	0	0	68	1	120	38.3	360	588	1	0	1	0	0	0	0	0	1	0	0	0	0	1	0	1690
0	1	0	0	297	1	140	29	252.3	588	1	0	0	1	1	0	0	0	0	0	1	0	0	0	0	5520
0	1	0	0	171	2	120	46	664.9	1877	1	0	1	0	0	0	0	0	1	0	0	0	0	0	1	4375
1	0	0	0	52	1	130	64.8	996	1470	1	0	1	0	0	0	0	0	1	0	0	0	0	1	0	4898
1	0	0	0	2	1	120	47	465.9	1065	1	0	1	0	0	0	0	0	1	0	0	0	0	1	0	4600
1	0	0	0	173	1	120	54.2	1258	1470	1	0	1	0	0	0	0	0	1	0	0	0	0	1	0	5819
0	0	1	0	148	2	120	43.1	494.5	845	1	0	1	0	0	0	0	0	1	0	0	0	0	0	1	1800
0	1	0	0	59	1	120	42.7	338.9	588	1	0	1	0	0	0	0	0	0	1	0	0	0	1	0	4531
1	0	0	0	322	1	120	50	620.1	1164	1	0	1	0	0	0	0	0	1	0	0	0	0	1	0	1667
0	1	0	0	118	2	125	43.1	494.5	845	1	0	1	0	0	0	0	1	0	0	0	0	0	0	1	360
1	0	0	0	121	1	120	64.8	970.2	1341	1	0	1	0	0	0	0	0	0	1	0	0	0	1	0	6340
0	0	1	0	218	1	125	56.6	705.6	1300	1	0	1	0	0	0	0	0	1	0	0	0	0	1	0	7550
0	0	1	0	45	1	120	64.8	970.2	1341	1	0	1	0	0	0	0	0	1	0	0	0	0	1	0	5880
0	0	1	0	95	1	120	39.1	320.4	771	1	0	1	0	0	0	0	0	0	1	0	0	0	1	0	1206
0	1	0	0	154	1	140	60.3	896.7	883	1	0	0	1	1	0	0	0	0	0	1	0	0	0	0	3550
1	0	0	0	128	1	130	40.5	438.6	882	1	0	1	0	0	0	0	0	1	0	0	0	0	1	0	3770
1	0	0	0	132	2	130	46	664.9	1877	1	0	1	0	0	0	0	0	0	1	0	0	0	0	1	3650
0	0	1	0	273	1	120	60	940.5	1471	1	0	0	1	0	0	0	0	1	0	0	0	0	1	0	7500
1	0	0	0	287	1	138	38.8	310.3	882	1	0	1	0	0	0	0	0	0	1	0	0	0	1	0	2150
0	0	1	0	284	1	120	39.5	372.5	735	1	0	1	0	0	0	0	0	1	0	0	0	0	1	0	5018
0	1	0	0	283	1	140	61.2	916.3	478	1	0	0	1	1	0	0	0	0	0	1	0	0	0	0	720
0	0	1	0	264	1	132	64.8	970.2	1341	1	0	1	0	0	0	0	0	0	1	0	0	0	1	0	3700
1	0	0	0	95	1	120	37.2	388.2	588	1	0	1	0	0	0	0	0	0	1	0	0	0	1	0	5850
1	0	0	0	269	1	140	37.7	415.7	882	1	0	1	0	0	0	0	0	1	0	0	0	0	1	0	5525
1	0	0	0	279	1	138	38.8	310.3	882	1	0	1	0	0	0	0	0	0	1	0	0	0	1	0	2125
0	1	0	0	169	1	120	33	299.1	1037	1	0	1	0	0	0	0	0	1	0	0	0	0	1	0	1249
0	1	0	0	53	1	120	47	465.9	1065	1	0	1	0	0	0	0	0	1	0	0	0	0	1	0	6750
0	1	0	0	194	1	142	44.8	756	1103	1	1	0	0	0	0	0	0	1	0	0	0	0	1	0	2490
0	0	1	0	137	1	120	29	264.4	698	2	0	1	0	0	0	0	0	1	0	0	0	0	1	0	4482
0	0	1	0	61	1	130	42	376.9	588	1	0	1	0	0	0	0	0	1	0	0	0	0	1	0	4030
1	0	0	0	82	1	120	38.3	360	588	1	0	1	0	0	0	0	0	1	0	0	0	0	1	0	2466
[truncated: 4,807 more rows]
